# Supplementary material for: Adaptation to High Ethanol Reveals Complex Evolutionary Pathways
Source: PLoS Genet. 2015 Nov 6;11(11):e1005635. doi: 10.1371/journal.pgen.1005635 (PMC4636377; doi:10.1371/journal.pgen.1005635)
Supplement: S6 File — (XLS) [file pgen.1005635.s023.xls]

## Sheet: PheNetic_reactor 1
File created with BiNGO (c) on Jan 22, 2015 at 10:26:28 AM
ontology: namespace
curator: bingo
Selected ontology file : jar:file:/home/driesdm/.cytoscape/2.8/plugins/BiNGO-2.44/BiNGO.jar!/GO_Biological_Process
Selected annotation file : /home/driesdm/gene_ontologies/gene_association.sgd
Discarded evidence codes :
Overrepresentation
Selected statistical test : Hypergeometric test
Selected correction : Benjamini & Hochberg False Discovery Rate (FDR) correction
Selected significance level : 0.1
Testing option : Use whole annotation as reference set
The selected cluster :
YBL084C	YLR116W	YIL106W	YHR119W	YDR047W	YER062C	YER025W	YMR276W	YNL281W	YDR191W	YJL052W	YDL065C	YLR421C	YOR353C	YDL017W	YKL189W	YCR082W	YMR190C	YLR131C	YGR059W	YMR318C	YNL102W	YLR328W	YER095W	YDL155W	YJL005W	YMR065W	YJR066W	YOL006C	YPR052C	YDL159W	YPL180W	YGR086C	YOR269W	YBR234C	YML058W	YDR419W	YMR284W	YLR332W	YKR069W	YCR030C	YBR233W	YNL129W	YKL010C	YIL033C	YGR040W	YLR238W	YEL061C	YKL203C	YJR007W
No annotations were retrieved for the following entities:
GO-ID	p-value	corr p-value	x	n	X	N	Description	Genes in test set
7049	9.0506e-11	7.1137e-08	27	589	73	6353	cell cycle	YBL084C|YIL106W|YOR269W|YMR276W|YML058W|YCR030C|YGR040W|YOR353C|YDL017W|YLR238W|YEL061C|YKL203C|YMR190C|YLR337C|YLR131C|YGR059W|YNL102W|YKR042W|YLR079W|YKL129C|YER095W|YPR120C|YDL155W|YDR013W|YBL023C|YJR066W|YOL006C
50789	1.1713e-06	0.00029203	35	1422	73	6353	regulation of biological process	YIL106W|YPL180W|YGR086C|YHR119W|YBR234C|YER025W|YNL281W|YML058W|YMR284W|YDR191W|YDL065C|YGR040W|YIL033C|YOR353C|YDL017W|YLR238W|YKL189W|YKL203C|YMR190C|YCR033W|YLR131C|YNL102W|YKR042W|YGR083C|YLR079W|YPR120C|YIL130W|YPL001W|YDL155W|YJL005W|YJR066W|YOL006C
19222	1.4167e-06	0.00029203	29	1041	73	6353	regulation of metabolic process	YGR086C|YHR119W|YER025W|YNL281W|YML058W|YMR284W|YDR191W|YDL065C|YIL033C|YGR040W|YDL017W|YKL189W|YKL203C|YMR190C|YLR131C|YCR033W|YNL102W|YKR042W|YGR083C|YLR079W|YPR120C|YIL130W|YPL001W|YDL155W|YJR066W|YOL006C|YPR052C|YDL159W|YKL125W
65007	1.4862e-06	0.00029203	38	1647	73	6353	biological regulation	YIL106W|YPL180W|YGR086C|YHR119W|YBR234C|YER025W|YNL281W|YML058W|YMR284W|YDR191W|YDL065C|YBR233W|YGR040W|YIL033C|YOR353C|YDL017W|YLR238W|YKL189W|YKL203C|YMR190C|YCR033W|YLR131C|YGL016W|YNL102W|YKR042W|YGR083C|YLR079W|YPR120C|YER095W|YIL130W|YPL001W|YDL155W
22402	2.0966e-06	0.00032958	19	499	73	6353	cell cycle process	YBL084C|YLR131C|YOR269W|YMR276W|YNL102W|YLR079W|YKL129C|YPR120C|YER095W|YDL155W|YBL023C|YDL017W|YJR066W|YLR238W|YOL006C|YKL203C|YEL061C|YLR337C|YMR190C
31323	3.2865e-06	0.00043053	28	1021	73	6353	regulation of cellular metabolic process	YGR086C|YHR119W|YER025W|YNL281W|YML058W|YMR284W|YDR191W|YIL033C|YGR040W|YDL017W|YKL189W|YKL203C|YMR190C|YLR131C|YCR033W|YNL102W|YKR042W|YGR083C|YLR079W|YPR120C|YIL130W|YPL001W|YDL155W|YJR066W|YOL006C|YPR052C|YDL159W|YKL125W
278	4.5583e-06	0.00051184	14	293	73	6353	mitotic cell cycle	YBL084C|YLR131C|YOR269W|YNL102W|YLR079W|YPR120C|YDL155W|YBL023C|YDL017W|YJR066W|YOL006C|YEL061C|YKL203C|YMR190C
50794	5.2583e-06	0.00051663	33	1373	73	6353	regulation of cellular process	YIL106W|YPL180W|YGR086C|YHR119W|YBR234C|YER025W|YNL281W|YML058W|YMR284W|YDR191W|YIL033C|YGR040W|YOR353C|YDL017W|YKL189W|YKL203C|YMR190C|YCR033W|YLR131C|YNL102W|YKR042W|YGR083C|YLR079W|YPR120C|YIL130W|YPL001W|YDL155W|YJL005W|YJR066W|YOL006C|YPR052C|YDL159W
6950	1.1171e-05	0.00079606	22	723	73	6353	response to stress	YPL180W|YGR086C|YHR119W|YER062C|YNL102W|YDR419W|YNL281W|YML058W|YKR042W|YMR284W|YLR332W|YBL047C|YKL129C|YER095W|YIL130W|YPL001W|YDR013W|YBL023C|YDL017W|YJR066W|YPR052C|YMR190C
51329	1.1243e-05	0.00079606	8	95	73	6353	interphase of mitotic cell cycle	YLR131C|YDL155W|YNL102W|YBL023C|YJR066W|YLR079W|YKL203C|YPR120C
48523	1.1387e-05	0.00079606	16	409	73	6353	negative regulation of cellular process	YCR033W|YHR119W|YNL102W|YML058W|YKR042W|YMR284W|YGR083C|YLR079W|YDR191W|YPL001W|YIL033C|YDL017W|YJR066W|YOL006C|YKL203C|YMR190C
51325	1.2154e-05	0.00079606	8	96	73	6353	interphase	YLR131C|YDL155W|YNL102W|YBL023C|YJR066W|YLR079W|YKL203C|YPR120C
48519	1.4986e-05	0.00090608	16	418	73	6353	negative regulation of biological process	YCR033W|YHR119W|YNL102W|YML058W|YKR042W|YMR284W|YGR083C|YLR079W|YDR191W|YPL001W|YIL033C|YDL017W|YJR066W|YOL006C|YKL203C|YMR190C
50896	2.4583e-05	0.0013802	25	940	73	6353	response to stimulus	YGR086C|YPL180W|YHR119W|YER062C|YNL281W|YML058W|YDR419W|YMR284W|YLR332W|YGR040W|YDL017W|YLR238W|YMR190C|YNL102W|YKR042W|YBL047C|YER095W|YKL129C|YIL130W|YPL001W|YDR013W|YBL023C|YJR066W|YDL159W|YPR052C
9987	3.0087e-05	0.0015766	71	5142	73	6353	cellular process	YBL084C|YLR116W|YIL106W|YHR119W|YDR047W|YER062C|YER025W|YMR276W|YNL281W|YDR191W|YJL052W|YDL065C|YLR421C|YOR353C|YDL017W|YCR082W|YKL189W|YMR190C|YLR131C|YGR059W|YNL102W|YMR318C|YLR328W|YER095W|YDL155W|YJL005W|YMR065W|YJR066W|YOL006C|YPR052C|YDL159W|YPL180W
22403	4.4094e-05	0.0021661	15	406	73	6353	cell cycle phase	YBL084C|YLR131C|YOR269W|YNL102W|YLR079W|YPR120C|YER095W|YDL155W|YBL023C|YDL017W|YJR066W|YOL006C|YEL061C|YKL203C|YMR190C
10507	4.9299e-05	0.0022794	3	7	73	6353	negative regulation of autophagy	YJR066W|YLR079W|YKL203C
51726	9.5299e-05	0.0040751	10	203	73	6353	regulation of cell cycle	YCR033W|YIL106W|YDL155W|YNL102W|YDL017W|YJR066W|YLR079W|YKL203C|YPR120C|YMR190C
42325	9.8508e-05	0.0040751	6	66	73	6353	regulation of phosphorylation	YGR086C|YDL155W|YIL033C|YLR079W|YDL159W|YPR120C
51301	0.00011193	0.0041577	12	294	73	6353	cell division	YBL084C|YOR269W|YIL106W|YDL155W|YOR353C|YKR042W|YDL017W|YKL189W|YEL061C|YKL129C|YPR120C|YLR337C
9895	0.00011637	0.0041577	3	9	73	6353	negative regulation of catabolic process	YJR066W|YLR079W|YKL203C
31330	0.00011637	0.0041577	3	9	73	6353	negative regulation of cellular catabolic process	YJR066W|YLR079W|YKL203C
23052	0.00015863	0.0054201	12	305	73	6353	signaling	YPL180W|YGR040W|YIL033C|YJL005W|YOR353C|YNL102W|YLR332W|YJR066W|YBL047C|YKL203C|YDL159W|YMR190C
6260	0.0001655	0.0054201	8	138	73	6353	DNA replication	YNL102W|YDR013W|YDR419W|YBL023C|YDL017W|YOL006C|YPR120C|YMR190C
6261	0.00018341	0.0057665	7	105	73	6353	DNA-dependent DNA replication	YNL102W|YDR013W|YDR419W|YBL023C|YDL017W|YOL006C|YMR190C
727	0.00019812	0.0059893	4	26	73	6353	double-strand break repair via break-induced replication	YDR013W|YMR284W|YBL023C|YDL017W
6974	0.00022118	0.0060938	12	316	73	6353	response to DNA damage stimulus	YPL001W|YNL102W|YDR013W|YDR419W|YML058W|YMR284W|YBL023C|YDL017W|YJR066W|YPR052C|YER095W|YMR190C
724	0.00022445	0.0060938	5	49	73	6353	double-strand break repair via homologous recombination	YDR013W|YMR284W|YBL023C|YDL017W|YMR190C
1558	0.00022484	0.0060938	3	11	73	6353	regulation of cell growth	YPL180W|YJR066W|YKL203C
3	0.00030375	0.0079583	12	327	73	6353	reproduction	YHR119W|YGR040W|YGR059W|YOR353C|YNL102W|YMR065W|YLR238W|YKL189W|YDL159W|YKL129C|YLR337C|YMR190C
23034	0.00031791	0.0080606	9	192	73	6353	intracellular signaling pathway	YPL180W|YGR040W|YJL005W|YLR332W|YJR066W|YBL047C|YKL203C|YDL159W|YMR190C
60255	0.00037573	0.0087178	22	910	73	6353	regulation of macromolecule metabolic process	YCR033W|YLR131C|YHR119W|YER025W|YNL102W|YML058W|YKR042W|YMR284W|YGR083C|YDR191W|YDL065C|YPR120C|YIL130W|YPL001W|YGR040W|YIL033C|YDL017W|YKL189W|YOL006C|YPR052C|YKL125W|YMR190C
9435	0.00038332	0.0087178	3	13	73	6353	NAD biosynthetic process	YGR010W|YNL129W|YLR328W
45859	0.00038815	0.0087178	5	55	73	6353	regulation of protein kinase activity	YGR086C|YDL155W|YLR079W|YDL159W|YPR120C
51174	0.00039929	0.0087178	6	85	73	6353	regulation of phosphorus metabolic process	YGR086C|YDL155W|YIL033C|YLR079W|YDL159W|YPR120C
19220	0.00039929	0.0087178	6	85	73	6353	regulation of phosphate metabolic process	YGR086C|YDL155W|YIL033C|YLR079W|YDL159W|YPR120C
51716	0.00045996	0.0095076	18	674	73	6353	cellular response to stimulus	YHR119W|YNL102W|YML058W|YDR419W|YMR284W|YLR332W|YBL047C|YER095W|YPL001W|YGR040W|YDR013W|YBL023C|YDL017W|YLR238W|YJR066W|YPR052C|YDL159W|YMR190C
6996	0.00047954	0.0095076	27	1262	73	6353	organelle organization	YBL084C|YOR269W|YHR119W|YBR234C|YMR276W|YML058W|YMR284W|YLR332W|YDR191W|YDL065C|YCR030C|YBR233W|YDL017W|YCR082W|YEL061C|YKL203C|YMR190C|YLR337C|YCR033W|YKR042W|YPR120C|YER095W|YPL001W|YDL155W|YMR065W|YOL006C|YPR052C
84	0.00048385	0.0095076	3	14	73	6353	S phase of mitotic cell cycle	YDL155W|YNL102W|YBL023C
10506	0.00048385	0.0095076	3	14	73	6353	regulation of autophagy	YJR066W|YLR079W|YKL203C
43549	0.00049778	0.0095429	5	58	73	6353	regulation of kinase activity	YGR086C|YDL155W|YLR079W|YDL159W|YPR120C
725	0.00058285	0.010031	5	60	73	6353	recombinational repair	YDR013W|YMR284W|YBL023C|YDL017W|YMR190C
51338	0.00058285	0.010031	5	60	73	6353	regulation of transferase activity	YGR086C|YDL155W|YLR079W|YDL159W|YPR120C
33014	0.00059983	0.010031	3	15	73	6353	tetrapyrrole biosynthetic process	YDR047W|YDR044W|YKR069W
6779	0.00059983	0.010031	3	15	73	6353	porphyrin biosynthetic process	YDR047W|YDR044W|YKR069W
6783	0.00059983	0.010031	3	15	73	6353	heme biosynthetic process	YDR047W|YDR044W|YKR069W
51320	0.00059983	0.010031	3	15	73	6353	S phase	YDL155W|YNL102W|YBL023C
723	0.0006784	0.010277	5	62	73	6353	telomere maintenance	YBR233W|YHR119W|YMR284W|YER095W|YMR190C
60249	0.0006784	0.010277	5	62	73	6353	anatomical structure homeostasis	YBR233W|YHR119W|YMR284W|YER095W|YMR190C
22616	0.00071575	0.010277	4	36	73	6353	DNA strand elongation	YNL102W|YBL023C|YOL006C|YMR190C
31324	0.00071795	0.010277	11	309	73	6353	negative regulation of cellular metabolic process	YPL001W|YHR119W|YNL102W|YML058W|YMR284W|YGR083C|YJR066W|YLR079W|YOL006C|YDR191W|YKL203C
32200	0.00073036	0.010277	5	63	73	6353	telomere organization	YBR233W|YHR119W|YMR284W|YER095W|YMR190C
33013	0.00073219	0.010277	3	16	73	6353	tetrapyrrole metabolic process	YDR047W|YDR044W|YKR069W
6778	0.00073219	0.010277	3	16	73	6353	porphyrin metabolic process	YDR047W|YDR044W|YKR069W
42168	0.00073219	0.010277	3	16	73	6353	heme metabolic process	YDR047W|YDR044W|YKR069W
19359	0.00073219	0.010277	3	16	73	6353	nicotinamide nucleotide biosynthetic process	YGR010W|YNL129W|YLR328W
9892	0.00082054	0.011001	11	314	73	6353	negative regulation of metabolic process	YPL001W|YHR119W|YNL102W|YML058W|YMR284W|YGR083C|YJR066W|YLR079W|YOL006C|YDR191W|YKL203C
23033	0.00085791	0.011001	9	220	73	6353	signaling pathway	YPL180W|YGR040W|YJL005W|YLR332W|YJR066W|YBL047C|YKL203C|YDL159W|YMR190C
6259	0.00085916	0.011001	14	475	73	6353	DNA metabolic process	YHR119W|YNL102W|YDR419W|YMR284W|YER095W|YPR120C|YBR233W|YPL001W|YDR013W|YBL023C|YDL017W|YOL006C|YPR052C|YMR190C
31929	0.00088177	0.011001	3	17	73	6353	TOR signaling cascade	YPL180W|YJR066W|YKL203C
42790	0.00088177	0.011001	3	17	73	6353	transcription of nuclear rRNA large RNA polymerase I transcript	YOR341W|YJR066W|YJL148W
40008	0.00088177	0.011001	3	17	73	6353	regulation of growth	YPL180W|YJR066W|YKL203C
19363	0.00088177	0.011001	3	17	73	6353	pyridine nucleotide biosynthetic process	YGR010W|YNL129W|YLR328W
16043	0.0010034	0.012063	33	1763	73	6353	cellular component organization	YBL084C|YPL180W|YGR086C|YOR269W|YHR119W|YBR234C|YMR276W|YML058W|YMR284W|YLR332W|YDR191W|YDL065C|YCR030C|YBR233W|YDL017W|YCR082W|YKL203C|YEL061C|YLR337C|YMR190C|YCR033W|YKR042W|YBL047C|YKL129C|YPR120C|YER095W|YPL001W|YDL155W|YMR065W|YBL023C|YJR066W|YOL006C
33554	0.0010112	0.012063	15	540	73	6353	cellular response to stress	YHR119W|YNL102W|YML058W|YDR419W|YMR284W|YLR332W|YBL047C|YER095W|YPL001W|YDR013W|YBL023C|YDL017W|YJR066W|YPR052C|YMR190C
80090	0.0010147	0.012063	22	977	73	6353	regulation of primary metabolic process	YCR033W|YLR131C|YHR119W|YER025W|YNL102W|YNL281W|YML058W|YKR042W|YMR284W|YGR083C|YDR191W|YPR120C|YIL130W|YPL001W|YGR040W|YIL033C|YDL017W|YKL189W|YOL006C|YPR052C|YKL125W|YMR190C
6281	0.0010283	0.012063	10	273	73	6353	DNA repair	YPL001W|YNL102W|YDR013W|YDR419W|YMR284W|YBL023C|YDL017W|YPR052C|YER095W|YMR190C
51276	0.0010673	0.012337	13	430	73	6353	chromosome organization	YBR233W|YCR033W|YPL001W|YHR119W|YKR042W|YMR284W|YCR082W|YOL006C|YDR191W|YEL061C|YPR052C|YER095W|YMR190C
7165	0.0011491	0.01309	10	277	73	6353	signal transduction	YPL180W|YGR040W|YIL033C|YJL005W|YOR353C|YNL102W|YJR066W|YKL203C|YDL159W|YMR190C
23060	0.0011811	0.013262	10	278	73	6353	signal transmission	YPL180W|YGR040W|YIL033C|YJL005W|YOR353C|YNL102W|YJR066W|YKL203C|YDL159W|YMR190C
23046	0.0013521	0.014834	10	283	73	6353	signaling process	YPL180W|YGR040W|YIL033C|YJL005W|YOR353C|YNL102W|YJR066W|YKL203C|YDL159W|YMR190C
32505	0.0013588	0.014834	8	189	73	6353	reproduction of a single-celled organism	YHR119W|YGR059W|YOR353C|YNL102W|YKL189W|YKL129C|YLR337C|YMR190C
10564	0.0014194	0.015283	6	108	73	6353	regulation of cell cycle process	YCR033W|YIL106W|YDL155W|YDL017W|YPR120C|YMR190C
19219	0.001451	0.015412	19	806	73	6353	regulation of nucleobase, nucleoside, nucleotide and nucleic acid metabolic process	YCR033W|YLR131C|YHR119W|YNL102W|YNL281W|YML058W|YKR042W|YMR284W|YDR191W|YPR120C|YIL130W|YPL001W|YGR040W|YDL017W|YKL189W|YOL006C|YPR052C|YKL125W|YMR190C
51171	0.001517	0.015899	19	809	73	6353	regulation of nitrogen compound metabolic process	YCR033W|YLR131C|YHR119W|YNL102W|YNL281W|YML058W|YKR042W|YMR284W|YDR191W|YPR120C|YIL130W|YPL001W|YGR040W|YDL017W|YKL189W|YOL006C|YPR052C|YKL125W|YMR190C
6279	0.0018962	0.01961	2	6	73	6353	premeiotic DNA synthesis	YNL102W|YPR120C
6325	0.0020431	0.020856	9	249	73	6353	chromatin organization	YCR033W|YPL001W|YHR119W|YKR042W|YMR284W|YCR082W|YOL006C|YDR191W|YPR052C
10556	0.002175	0.021917	19	834	73	6353	regulation of macromolecule biosynthetic process	YCR033W|YLR131C|YHR119W|YER025W|YNL102W|YML058W|YKR042W|YMR284W|YGR083C|YDR191W|YPR120C|YIL130W|YPL001W|YGR040W|YDL017W|YKL189W|YOL006C|YPR052C|YKL125W
48610	0.0023457	0.023338	8	206	73	6353	reproductive cellular process	YHR119W|YGR040W|YGR059W|YNL102W|YMR065W|YLR238W|YDL159W|YMR190C
51188	0.0024317	0.023891	6	120	73	6353	cofactor biosynthetic process	YGR010W|YNL129W|YDR047W|YLR328W|YDR044W|YKR069W
10696	0.0026349	0.024911	2	7	73	6353	positive regulation of spindle pole body separation	YDL155W|YPR120C
6782	0.0026349	0.024911	2	7	73	6353	protoporphyrinogen IX biosynthetic process	YDR047W|YDR044W
46501	0.0026349	0.024911	2	7	73	6353	protoporphyrinogen IX metabolic process	YDR047W|YDR044W
32506	0.0026622	0.024911	5	84	73	6353	cytokinetic process	YOR353C|YKR042W|YKL189W|YKL129C|YLR337C
40029	0.0028675	0.026516	6	124	73	6353	regulation of gene expression, epigenetic	YPL001W|YHR119W|YKR042W|YMR284W|YOL006C|YDR191W
31326	0.0029028	0.02653	19	855	73	6353	regulation of cellular biosynthetic process	YCR033W|YLR131C|YHR119W|YER025W|YNL102W|YML058W|YKR042W|YMR284W|YGR083C|YDR191W|YPR120C|YIL130W|YPL001W|YGR040W|YDL017W|YKL189W|YOL006C|YPR052C|YKL125W
9889	0.002942	0.02658	19	856	73	6353	regulation of biosynthetic process	YCR033W|YLR131C|YHR119W|YER025W|YNL102W|YML058W|YKR042W|YMR284W|YGR083C|YDR191W|YPR120C|YIL130W|YPL001W|YGR040W|YDL017W|YKL189W|YOL006C|YPR052C|YKL125W
51052	0.0031028	0.027648	5	87	73	6353	regulation of DNA metabolic process	YNL102W|YML058W|YOL006C|YPR120C|YMR190C
46148	0.0031306	0.027648	3	26	73	6353	pigment biosynthetic process	YDR047W|YDR044W|YKR069W
65009	0.0034182	0.029843	7	172	73	6353	regulation of molecular function	YGR086C|YDL155W|YGR040W|YNL281W|YLR079W|YDL159W|YPR120C
79	0.0034931	0.029843	3	27	73	6353	regulation of cyclin-dependent protein kinase activity	YDL155W|YLR079W|YPR120C
42440	0.0034931	0.029843	3	27	73	6353	pigment metabolic process	YDR047W|YDR044W|YKR069W
19674	0.0038803	0.032795	3	28	73	6353	NAD metabolic process	YGR010W|YNL129W|YLR328W
6413	0.0040034	0.033475	4	57	73	6353	translational initiation	YER025W|YGR083C|YJR007W|YOR361C
279	0.0042658	0.034429	10	331	73	6353	M phase	YBL084C|YOR269W|YDL155W|YDL017W|YJR066W|YOL006C|YEL061C|YPR120C|YER095W|YMR190C
80	0.0042926	0.034429	3	29	73	6353	G1 phase of mitotic cell cycle	YLR131C|YJR066W|YKL203C
51318	0.0042926	0.034429	3	29	73	6353	G1 phase	YLR131C|YJR066W|YKL203C
9303	0.0042926	0.034429	3	29	73	6353	rRNA transcription	YOR341W|YJR066W|YJL148W
10695	0.0044502	0.035332	2	9	73	6353	regulation of spindle pole body separation	YDL155W|YPR120C
7067	0.0045292	0.0356	7	181	73	6353	mitosis	YBL084C|YOR269W|YDL155W|YDL017W|YOL006C|YEL061C|YMR190C
280	0.0048096	0.037429	7	183	73	6353	nuclear division	YBL084C|YOR269W|YDL155W|YDL017W|YOL006C|YEL061C|YMR190C
19954	0.00511	0.038364	4	61	73	6353	asexual reproduction	YOR353C|YKL189W|YKL129C|YLR337C
7114	0.00511	0.038364	4	61	73	6353	cell budding	YOR353C|YKL189W|YKL129C|YLR337C
6897	0.0051737	0.038364	5	98	73	6353	endocytosis	YGR086C|YBL047C|YCR030C|YKL129C|YLR337C
16570	0.0051737	0.038364	5	98	73	6353	histone modification	YCR033W|YPL001W|YHR119W|YCR082W|YDR191W
16569	0.0051737	0.038364	5	98	73	6353	covalent chromatin modification	YCR033W|YPL001W|YHR119W|YCR082W|YDR191W
87	0.0054095	0.039737	7	187	73	6353	M phase of mitotic cell cycle	YBL084C|YOR269W|YDL155W|YDL017W|YOL006C|YEL061C|YMR190C
1402	0.0055216	0.040185	2	10	73	6353	signal transduction involved in filamentous growth	YGR040W|YDL159W
6270	0.0062028	0.044728	3	33	73	6353	DNA-dependent DNA replication initiation	YNL102W|YBL023C|YDL017W
6302	0.006381	0.045411	5	103	73	6353	double-strand break repair	YDR013W|YMR284W|YBL023C|YDL017W|YMR190C
48285	0.006413	0.045411	7	193	73	6353	organelle fission	YBL084C|YOR269W|YDL155W|YDL017W|YOL006C|YEL061C|YMR190C
45814	0.0066444	0.045413	5	104	73	6353	negative regulation of gene expression, epigenetic	YPL001W|YHR119W|YMR284W|YOL006C|YDR191W
6342	0.0066444	0.045413	5	104	73	6353	chromatin silencing	YPL001W|YHR119W|YMR284W|YOL006C|YDR191W
746	0.0066444	0.045413	5	104	73	6353	conjugation	YGR040W|YMR065W|YLR332W|YLR238W|YDL159W
910	0.0066444	0.045413	5	104	73	6353	cytokinesis	YOR353C|YKR042W|YKL189W|YKL129C|YLR337C
6271	0.0067476	0.045415	3	34	73	6353	DNA strand elongation involved in DNA replication	YNL102W|YBL023C|YOL006C
6970	0.0067603	0.045415	4	66	73	6353	response to osmotic stress	YPL180W|YER062C|YLR332W|YKL129C
6360	0.00732	0.048759	3	35	73	6353	transcription from RNA polymerase I promoter	YOR341W|YJR066W|YJL148W
22414	0.0075641	0.049961	8	250	73	6353	reproductive process	YHR119W|YGR040W|YGR059W|YNL102W|YMR065W|YLR238W|YDL159W|YMR190C
35556	0.0077388	0.050501	6	152	73	6353	intracellular signal transduction	YPL180W|YGR040W|YJL005W|YJR066W|YKL203C|YDL159W
16458	0.0077743	0.050501	5	108	73	6353	gene silencing	YPL001W|YHR119W|YMR284W|YOL006C|YDR191W
6312	0.0079204	0.050987	3	36	73	6353	mitotic recombination	YNL102W|YER095W|YMR190C
7534	0.0079789	0.050987	2	12	73	6353	gene conversion at mating-type locus	YNL102W|YMR190C
65008	0.0085038	0.053689	11	424	73	6353	regulation of biological quality	YBR233W|YHR119W|YGL016W|YBR234C|YER025W|YMR284W|YKL189W|YDL159W|YDL065C|YER095W|YMR190C
7186	0.008549	0.053689	3	37	73	6353	G-protein coupled receptor protein signaling pathway	YGR040W|YJL005W|YDL159W
16568	0.0086066	0.053689	7	204	73	6353	chromatin modification	YCR033W|YPL001W|YHR119W|YKR042W|YCR082W|YDR191W|YPR052C
7010	0.0090585	0.056063	7	206	73	6353	cytoskeleton organization	YBR234C|YMR276W|YKL203C|YEL061C|YCR030C|YPR120C|YLR337C
7166	0.0092063	0.056175	3	38	73	6353	cell surface receptor linked signaling pathway	YGR040W|YJL005W|YDL159W
50790	0.0092864	0.056175	6	158	73	6353	regulation of catalytic activity	YGR086C|YDL155W|YNL281W|YLR079W|YDL159W|YPR120C
6310	0.009291	0.056175	7	207	73	6353	DNA recombination	YNL102W|YDR013W|YMR284W|YBL023C|YDL017W|YER095W|YMR190C
9628	0.0093674	0.056204	5	113	73	6353	response to abiotic stimulus	YGR086C|YPL180W|YER062C|YLR332W|YKL129C
10558	0.0099157	0.059043	8	262	73	6353	negative regulation of macromolecule biosynthetic process	YPL001W|YHR119W|YNL102W|YML058W|YMR284W|YGR083C|YOL006C|YDR191W
10468	0.010467	0.061857	17	823	73	6353	regulation of gene expression	YLR131C|YCR033W|YHR119W|YER025W|YKR042W|YMR284W|YGR083C|YDR191W|YDL065C|YIL130W|YPL001W|YGR040W|YDL017W|YKL189W|YOL006C|YPR052C|YKL125W
10947	0.011491	0.064976	1	1	73	6353	negative regulation of meiotic joint molecule formation	YMR190C
10946	0.011491	0.064976	1	1	73	6353	regulation of meiotic joint molecule formation	YMR190C
10834	0.011491	0.064976	1	1	73	6353	telomere maintenance via telomere shortening	YBR233W
9190	0.011491	0.064976	1	1	73	6353	cyclic nucleotide biosynthetic process	YJL005W
6171	0.011491	0.064976	1	1	73	6353	cAMP biosynthetic process	YJL005W
71508	0.011491	0.064976	1	1	73	6353	activation of MAPK activity involved in conjugation with cellular fusion	YDL159W
34641	0.012087	0.067863	33	2034	73	6353	cellular nitrogen compound metabolic process	YLR116W|YHR119W|YDR047W|YER025W|YDR419W|YMR284W|YLR332W|YDR191W|YKR069W|YBR233W|YNL129W|YDL017W|YJL148W|YMR190C|YLR131C|YKR025W|YNL102W|YLR328W|YER095W|YPR120C|YOR341W|YIL130W|YPL001W|YGR010W|YHR019C|YJL005W|YDR013W|YBL023C|YJR066W|YDR044W|YOL006C|YPR052C
51666	0.012415	0.068237	2	15	73	6353	actin cortical patch localization	YKL129C|YLR337C
6071	0.012415	0.068237	2	15	73	6353	glycerol metabolic process	YPL180W|YER062C
19400	0.012415	0.068237	2	15	73	6353	alditol metabolic process	YPL180W|YER062C
6139	0.012711	0.069383	30	1802	73	6353	nucleobase, nucleoside, nucleotide and nucleic acid metabolic process	YLR116W|YHR119W|YER025W|YDR419W|YMR284W|YLR332W|YDR191W|YBR233W|YNL129W|YDL017W|YJL148W|YMR190C|YLR131C|YKR025W|YNL102W|YLR328W|YER095W|YPR120C|YIL130W|YOR341W|YPL001W|YGR010W|YHR019C|YJL005W|YDR013W|YBL023C|YJR066W|YOL006C|YPR052C|YKL125W
51704	0.014083	0.07557	5	125	73	6353	multi-organism process	YGR040W|YMR065W|YLR332W|YLR238W|YDL159W
9890	0.014133	0.07557	8	279	73	6353	negative regulation of biosynthetic process	YPL001W|YHR119W|YNL102W|YML058W|YMR284W|YGR083C|YOL006C|YDR191W
31327	0.014133	0.07557	8	279	73	6353	negative regulation of cellular biosynthetic process	YPL001W|YHR119W|YNL102W|YML058W|YMR284W|YGR083C|YOL006C|YDR191W
6807	0.015662	0.080343	33	2068	73	6353	nitrogen compound metabolic process	YLR116W|YHR119W|YDR047W|YER025W|YDR419W|YMR284W|YLR332W|YDR191W|YKR069W|YBR233W|YNL129W|YDL017W|YJL148W|YMR190C|YLR131C|YKR025W|YNL102W|YLR328W|YER095W|YPR120C|YOR341W|YIL130W|YPL001W|YGR010W|YHR019C|YJL005W|YDR013W|YBL023C|YJR066W|YDR044W|YOL006C|YPR052C
34976	0.015844	0.080343	2	17	73	6353	response to endoplasmic reticulum stress	YLR332W|YBL047C
7118	0.015844	0.080343	2	17	73	6353	budding cell apical bud growth	YOR353C|YKL189W
7121	0.015844	0.080343	2	17	73	6353	bipolar cellular bud site selection	YKL129C|YLR337C
6984	0.015844	0.080343	2	17	73	6353	ER-nucleus signaling pathway	YLR332W|YBL047C
920	0.015844	0.080343	2	17	73	6353	cytokinetic cell separation	YOR353C|YKL189W
34620	0.015844	0.080343	2	17	73	6353	cellular response to unfolded protein	YLR332W|YBL047C
30968	0.015844	0.080343	2	17	73	6353	endoplasmic reticulum unfolded protein response	YLR332W|YBL047C
10605	0.01652	0.083236	8	287	73	6353	negative regulation of macromolecule metabolic process	YPL001W|YHR119W|YNL102W|YML058W|YMR284W|YGR083C|YOL006C|YDR191W
90068	0.017693	0.088176	2	18	73	6353	positive regulation of cell cycle process	YDL155W|YPR120C
70882	0.017725	0.088176	6	182	73	6353	cellular cell wall organization or biogenesis	YPL180W|YKR042W|YLR332W|YJR066W|YDL159W|YKL129C
71554	0.018608	0.091986	6	184	73	6353	cell wall organization or biogenesis	YPL180W|YKR042W|YLR332W|YJR066W|YDL159W|YKL129C
46496	0.019397	0.094653	3	50	73	6353	nicotinamide nucleotide metabolic process	YGR010W|YNL129W|YLR328W
31505	0.019517	0.094653	4	90	73	6353	fungal-type cell wall organization	YPL180W|YLR332W|YJR066W|YKL129C
32508	0.019629	0.094653	2	19	73	6353	DNA duplex unwinding	YBL023C|YMR190C
722	0.019629	0.094653	2	19	73	6353	telomere maintenance via recombination	YER095W|YMR190C
43687	0.019894	0.095347	11	479	73	6353	post-translational protein modification	YBL084C|YCR033W|YPL001W|YIL106W|YHR119W|YGR040W|YKL010C|YDL017W|YCR082W|YDR191W|YDL159W
6275	0.020443	0.096048	3	51	73	6353	regulation of DNA replication	YNL102W|YML058W|YPR120C
51493	0.020443	0.096048	3	51	73	6353	regulation of cytoskeleton organization	YDL155W|YBR234C|YPR120C
10324	0.020764	0.096048	5	138	73	6353	membrane invagination	YGR086C|YBL047C|YCR030C|YKL129C|YLR337C
44249	0.021479	0.096048	31	1950	73	6353	cellular biosynthetic process	YDR047W|YER025W|YER062C|YDR419W|YJL052W|YDR191W|YKR069W|YNL129W|YDL017W|YJR007W|YJL148W|YMR190C|YLR131C|YKR025W|YNL102W|YLR328W|YGR083C|YPR120C|YOR361C|YOR341W|YIL130W|YGR010W|YHR019C|YJL005W|YDR013W|YBL023C|YJR066W|YDR044W|YOL006C|YPR052C|YKL125W
10948	0.021519	0.096048	3	52	73	6353	negative regulation of cell cycle process	YCR033W|YDL017W|YMR190C
7015	0.021519	0.096048	3	52	73	6353	actin filament organization	YBR234C|YKL203C|YLR337C
19362	0.021519	0.096048	3	52	73	6353	pyridine nucleotide metabolic process	YGR010W|YNL129W|YLR328W
32392	0.02165	0.096048	2	20	73	6353	DNA geometric change	YBL023C|YMR190C
8156	0.02165	0.096048	2	20	73	6353	negative regulation of DNA replication	YNL102W|YML058W
10646	0.021738	0.096048	4	93	73	6353	regulation of cell communication	YCR033W|YIL033C|YLR079W|YDL159W
31329	0.022512	0.096048	4	94	73	6353	regulation of cellular catabolic process	YNL281W|YJR066W|YLR079W|YKL203C
187	0.022851	0.096048	1	2	73	6353	activation of MAPK activity	YDL159W
6421	0.022851	0.096048	1	2	73	6353	asparaginyl-tRNA aminoacylation	YHR019C
46058	0.022851	0.096048	1	2	73	6353	cAMP metabolic process	YJL005W
43406	0.022851	0.096048	1	2	73	6353	positive regulation of MAP kinase activity	YDL159W
734	0.022851	0.096048	1	2	73	6353	gene conversion at mating-type locus, DNA repair synthesis	YNL102W
31860	0.022851	0.096048	1	2	73	6353	telomeric 3' overhang formation	YMR190C
45046	0.022851	0.096048	1	2	73	6353	protein import into peroxisome membrane	YDL065C
33859	0.022851	0.096048	1	2	73	6353	furaldehyde metabolic process	YMR318C
46156	0.022851	0.096048	1	2	73	6353	siroheme metabolic process	YKR069W
46459	0.022851	0.096048	1	2	73	6353	short-chain fatty acid metabolic process	YDR191W
42148	0.022851	0.096048	1	2	73	6353	strand invasion	YER095W
19354	0.022851	0.096048	1	2	73	6353	siroheme biosynthetic process	YKR069W
45449	0.023615	0.098731	14	690	73	6353	regulation of transcription	YIL130W|YCR033W|YLR131C|YPL001W|YHR119W|YGR040W|YKR042W|YMR284W|YDL017W|YKL189W|YOL006C|YDR191W|YPR052C|YKL125W
16575	0.023753	0.098783	2	21	73	6353	histone deacetylation	YCR033W|YDR191W
30036	0.024109	0.099214	4	96	73	6353	actin cytoskeleton organization	YBR234C|YKL203C|YCR030C|YLR337C
35466	0.024109	0.099214	4	96	73	6353	regulation of signaling pathway	YCR033W|YIL033C|YLR238W|YDL159W
[truncated: 23 more columns]

## Sheet: PheNetic_reactor2_large
File created with BiNGO (c) on Jan 22, 2015 at 11:27:05 AM
ontology: namespace
curator: bingo
Selected ontology file : jar:file:/home/driesdm/.cytoscape/2.8/plugins/BiNGO-2.44/BiNGO.jar!/GO_Biological_Process
Selected annotation file : /home/driesdm/gene_ontologies/gene_association.sgd
Discarded evidence codes :
Overrepresentation
Selected statistical test : Hypergeometric test
Selected correction : Benjamini & Hochberg False Discovery Rate (FDR) correction
Selected significance level : 0.2
Testing option : Use whole annotation as reference set
The selected cluster :
YDR473C	YIL127C	YER051W	YMR120C	YPL164C	YJL052W	YJL153C	YAR071W	YBR030W	YER081W	YAL021C	YGR260W	YDR396W	YOR249C	YDR406W	YNL161W	YMR035W	YHR154W	YDR026C	YKL068W	YDR532C	YEL056W	YDL043C	YMR304W	YML038C	YMR314W	YHR165C	YNR052C	YDR151C	YIL099W	YMR183C	YBR016W	YDL102W	YER022W	YKL194C	YHR123W	YPL019C	YNR015W	YDR365C	YBR157C	YDR207C	YBR081C	YDL168W	YMR006C	YLR226W	YGR245C	YBR295W	YHL048W	YBR233W-A	YGR287C
YIR012W	YOL094C	YCR048W	YMR075W	YKR046C	YLR447C	YJL012C	YCL052C	YBL030C	YDR528W	YCR088W	YPL063W	YKR089C	YBR115C	YER169W	YLR022C	YDL164C	YPR115W	YOL052C	YFL018C	YMR062C	YPL026C	YHR037W	YDL175C	YAL062W	YMR150C	YDR507C	YBL016W	YJL106W	YBR250W	YBL047C	YDR164C	YER180C-A	YNL128W	YCR038C	YHR083W	YML086C	YNL309W	YBR127C	YNL292W	YDR482C	YOR261C	YDR398W	YEL060C	YAL029C	YMR012W
No annotations were retrieved for the following entities:
YDR396W	YOR318C	YMR075C-A
GO-ID	p-value	corr p-value	x	n	X	N	Description	Genes in test set
9987	2.0788e-06	0.0031494	270	5142	298	6353	cellular process	YDR473C|YIL127C|YER051W|YMR120C|YPL164C|YJL052W|YJL153C|YAR071W|YBR030W|YER081W|YAL021C|YGR260W|YOR249C|YDR406W|YNL161W|YHR154W|YMR035W|YDR026C|YKL068W|YEL056W|YDL043C|YMR304W|YHR165C|YMR314W|YNR052C|YDR151C|YIL099W|YMR183C|YDL102W|YER022W|YKL194C|YHR123W
16043	0.00016454	0.10455	111	1763	298	6353	cellular component organization	YIL084C|YML032C|YER051W|YPL190C|YMR211W|YNL182C|YML102W|YJL020C|YGL200C|YJR063W|YOR249C|YDR171W|YNL161W|YLR368W|YIL034C|YMR035W|YGL058W|YKL068W|YDR359C|YEL056W|YMR127C|YDL043C|YGL201C|YBR112C|YNL131W|YHR165C|YLR102C|YMR183C|YNL206C|YNL084C|YER008C|YER022W
6904	0.00020703	0.10455	5	13	298	6353	vesicle docking involved in exocytosis	YBR102C|YER008C|YPR055W|YJL085W|YDR164C
51601	0.00039463	0.10545	3	4	298	6353	exocyst localization	YBR102C|YER008C|YJL085W
1927	0.00039463	0.10545	3	4	298	6353	exocyst assembly	YBR102C|YER008C|YJL085W
6996	0.00041761	0.10545	83	1262	298	6353	organelle organization	YNL172W|YIL084C|YML032C|YPL055C|YER051W|YMR276W|YMR203W|YNL021W|YMR211W|YPR055W|YNL182C|YML102W|YJL020C|YGL200C|YEL059C-A|YOL068C|YLR268W|YDL217C|YOR249C|YDR171W|YPL181W|YOR239W|YNL161W|YLR368W|YIL034C|YMR035W|YGL058W|YKL068W|YKR083C|YDR359C|YMR127C|YEL05
6260	0.00068147	0.12583	16	138	298	6353	DNA replication	YOL094C|YIR008C|YDL102W|YKL108W|YPL055C|YJL194W|YLR233C|YGL058W|YGR180C|YNL290W|YNL182C|YGL201C|YDL164C|YAL021C|YOR144C|YER070W
51052	0.00068203	0.12583	12	87	298	6353	regulation of DNA metabolic process	YOL068C|YMR075W|YNL182C|YOL090W|YKL108W|YPL181W|YJL194W|YKL117W|YAL021C|YML058W|YOR144C|YLR182W
6563	0.00079581	0.12583	4	10	298	6353	L-serine metabolic process	YBR263W|YGR208W|YER081W|YFL018C
43687	0.00083055	0.12583	38	479	298	6353	post-translational protein modification	YNL172W|YHR082C|YIL084C|YMR075W|YPL055C|YER051W|YOR231W|YDR247W|YNL021W|YNL154C|YER169W|YBR030W|YCL024W|YIL148W|YBR081C|YLR226W|YPL026C|YOL068C|YOR249C|YIL038C|YBL016W|YDR507C|YNL161W|YLR368W|YJL106W|YPL203W|YGL058W|YEL056W|YMR127C|YNL128W|YOR339C|YBR125C
6564	0.00095228	0.12709	3	5	298	6353	L-serine biosynthetic process	YGR208W|YER081W|YFL018C
6893	0.0010067	0.12709	7	35	298	6353	Golgi to plasma membrane transport	YBR102C|YER008C|YPR055W|YPL051W|YJL085W|YJL004C|YMR183C
50789	0.0012821	0.13698	89	1422	298	6353	regulation of biological process	YDR214W|YJL087C|YIL084C|YIL127C|YPL055C|YER051W|YKL117W|YMR042W|YCR027C|YNL021W|YLR182W|YOL081W|YNL182C|YAL021C|YOR198C|YOL068C|YJL083W|YKL108W|YIL038C|YPL181W|YNL161W|YLR368W|YDR516C|YIL034C|YHR154W|YKL190W|YGL058W|YDR026C|YOR230W|YKL068W|YKR083C|YDR359C
30174	0.0012993	0.13698	6	27	298	6353	regulation of DNA-dependent DNA replication initiation	YMR075W|YNL182C|YKL108W|YPL181W|YJL194W|YAL021C
6796	0.0015895	0.13698	30	363	298	6353	phosphate metabolic process	YJL087C|YHR082C|YGL253W|YJL012C|YOR231W|YDR247W|YNL154C|YPL019C|YAR071W|YDR454C|YGR208W|YCL024W|YEL024W|YJR105W|YLR226W|YPL026C|YBR092C|YBL016W|YDR507C|YNL161W|YDR516C|YJL106W|YPL203W|YNL128W|YOR109W|YBR125C|YPL042C|YGR205W|YNL106C|YPL258C
6793	0.0015895	0.13698	30	363	298	6353	phosphorus metabolic process	YJL087C|YHR082C|YGL253W|YJL012C|YOR231W|YDR247W|YNL154C|YPL019C|YAR071W|YDR454C|YGR208W|YCL024W|YEL024W|YJR105W|YLR226W|YPL026C|YBR092C|YBL016W|YDR507C|YNL161W|YDR516C|YJL106W|YPL203W|YNL128W|YOR109W|YBR125C|YPL042C|YGR205W|YNL106C|YPL258C
16485	0.0016745	0.13698	7	38	298	6353	protein processing	YMR150C|YBL091C|YFR021W|YMR035W|YCL052C|YLR244C|YGR101W
6464	0.0018946	0.13698	45	622	298	6353	protein modification process	YNL172W|YHR082C|YIL084C|YMR075W|YPL055C|YER051W|YOR231W|YCL052C|YDR247W|YNL021W|YLR244C|YNL154C|YDL040C|YER169W|YBR030W|YCL024W|YIL148W|YBR081C|YLR226W|YPL026C|YOL068C|YOR249C|YLR172C|YIL038C|YBL091C|YBL016W|YDR507C|YNL161W|YLR368W|YJL106W|YPL203W|YGL058W
16570	0.0019707	0.13698	12	98	298	6353	histone modification	YOL068C|YIL084C|YMR075W|YER169W|YPL055C|YER051W|YAR003W|YBR081C|YGL058W|YNL021W|YMR127C|YEL056W
16569	0.0019707	0.13698	12	98	298	6353	covalent chromatin modification	YOL068C|YIL084C|YMR075W|YER169W|YPL055C|YER051W|YAR003W|YBR081C|YGL058W|YNL021W|YMR127C|YEL056W
48519	0.002004	0.13698	33	418	298	6353	negative regulation of biological process	YHR082C|YIL084C|YMR075W|YML058W|YNL021W|YLR244C|YOL081W|YER169W|YDR207C|YAL021C|YLR452C|YOL068C|YKL108W|YPL181W|YBL016W|YIL034C|YHR154W|YDR026C|YOR230W|YGL058W|YEL056W|YMR127C|YPL042C|YOL090W|YPR154W|YBR112C|YHR071W|YPR149W|YDR293C|YAR003W|YJR090C|YOR144C
70084	0.0021932	0.13698	2	2	298	6353	protein initiator methionine removal	YBL091C|YLR244C
35551	0.0021932	0.13698	2	2	298	6353	protein initiator methionine removal involved in protein maturation	YBL091C|YLR244C
42938	0.0021932	0.13698	2	2	298	6353	dipeptide transport	YKR093W|YJR152W
6275	0.0023308	0.13698	8	51	298	6353	regulation of DNA replication	YMR075W|YNL182C|YKL108W|YPL181W|YJL194W|YKL117W|YAL021C|YML058W
50794	0.0024123	0.13698	85	1373	298	6353	regulation of cellular process	YDR214W|YJL087C|YIL084C|YIL127C|YPL055C|YER051W|YKL117W|YMR042W|YCR027C|YNL021W|YLR182W|YOL081W|YNL182C|YAL021C|YOR198C|YOL068C|YJL083W|YKL108W|YIL038C|YPL181W|YNL161W|YLR368W|YDR516C|YIL034C|YHR154W|YGL058W|YDR026C|YOR230W|YKL068W|YKR083C|YDR359C|YMR127C
65007	0.0024413	0.13698	99	1647	298	6353	biological regulation	YJL087C|YIL084C|YIL127C|YML032C|YER051W|YCR027C|YLR182W|YOL081W|YNL182C|YGL200C|YAL021C|YOR198C|YNL161W|YLR368W|YIL034C|YHR154W|YDR026C|YGL058W|YKL068W|YDR359C|YEL056W|YMR127C|YPL042C|YER176W|YHR071W|YBR112C|YPL051W|YNR052C|YDR151C|YNL206C|YGL215W|YDL102W
19318	0.0026835	0.14115	13	115	298	6353	hexose metabolic process	YLR134W|YGR248W|YDR516C|YHR183W|YGL253W|YJL052W|YGL156W|YDL189W|YKL035W|YHR047C|YJR090C|YBR221C|YIL099W
48523	0.0027019	0.14115	32	409	298	6353	negative regulation of cellular process	YHR082C|YIL084C|YMR075W|YML058W|YNL021W|YOL081W|YER169W|YDR207C|YAL021C|YLR452C|YOL068C|YKL108W|YPL181W|YBL016W|YIL034C|YHR154W|YDR026C|YOR230W|YGL058W|YEL056W|YMR127C|YPL042C|YOL090W|YPR154W|YBR112C|YHR071W|YPR149W|YDR293C|YAR003W|YJR090C|YOR144C|YNL206C
48278	0.0029899	0.14893	5	22	298	6353	vesicle docking	YBR102C|YER008C|YPR055W|YJL085W|YDR164C
289	0.0031061	0.14893	3	7	298	6353	nuclear-transcribed mRNA poly(A) tail shortening	YIL038C|YAL021C|YNR052C
9892	0.0031588	0.14893	26	314	298	6353	negative regulation of metabolic process	YOL068C|YIL084C|YHR082C|YMR075W|YKL108W|YML058W|YGL058W|YDR026C|YOR230W|YLR244C|YNL021W|YMR127C|YEL056W|YOL081W|YPL042C|YOL090W|YER169W|YBR112C|YHR071W|YPR149W|YAL021C|YDR207C|YAR003W|YDR293C|YOR144C|YNL206C
90329	0.003265	0.14893	6	32	298	6353	regulation of DNA-dependent DNA replication	YMR075W|YNL182C|YKL108W|YPL181W|YJL194W|YAL021C
15031	0.0034962	0.14893	39	536	298	6353	protein transport	YER008C|YPR079W|YLL006W|YJL004C|YMR203W|YPL063W|YPR055W|YKR093W|YGL200C|YFR021W|YGR218W|YJL207C|YGR245C|YBL075C|YDL217C|YLR268W|YMR150C|YER122C|YHR103W|YMR035W|YOR230W|YKL068W|YJL085W|YDR164C|YER180C-A|YHR083W|YBR102C|YOR109W|YJL034W|YOL111C|YPR149W|YNL13
6261	0.0035345	0.14893	12	105	298	6353	DNA-dependent DNA replication	YNL290W|YOL094C|YIR008C|YNL182C|YGL201C|YKL108W|YDL102W|YJL194W|YDL164C|YAL021C|YGL058W|YOR144C
7049	0.003539	0.14893	42	589	298	6353	cell cycle	YNL172W|YOL094C|YDL102W|YML032C|YMR276W|YML058W|YPL164C|YDR247W|YBR135W|YDL164C|YCL024W|YAL021C|YPR115W|YOR198C|YLR226W|YGR245C|YBR233W-A|YOR249C|YKL108W|YBL016W|YJL194W|YJL106W|YBR250W|YOR230W|YGL058W|YKR083C|YCR038C|YNL290W|YPL042C|YNL309W|YOL090W|YNL24
22406	0.0036762	0.15053	5	23	298	6353	membrane docking	YBR102C|YER008C|YPR055W|YJL085W|YDR164C
6271	0.004479	0.16009	6	34	298	6353	DNA strand elongation involved in DNA replication	YNL290W|YOL094C|YIR008C|YGL201C|YDL102W|YDL164C
51053	0.004479	0.16009	6	34	298	6353	negative regulation of DNA metabolic process	YOL068C|YOL090W|YKL108W|YAL021C|YML058W|YOR144C
6007	0.0045483	0.16009	7	45	298	6353	glucose catabolic process	YLR134W|YGR248W|YDR516C|YHR183W|YGL253W|YJL052W|YBR221C
6006	0.0046509	0.16009	11	95	298	6353	glucose metabolic process	YLR134W|YHR047C|YKL035W|YGR248W|YDR516C|YHR183W|YGL253W|YJR090C|YJL052W|YBR221C|YIL099W
10526	0.0047981	0.16009	3	8	298	6353	negative regulation of transposition, RNA-mediated	YBL016W|YHR154W|YOR144C
10529	0.0047981	0.16009	3	8	298	6353	negative regulation of transposition	YBL016W|YHR154W|YOR144C
45184	0.0049566	0.16009	39	547	298	6353	establishment of protein localization	YER008C|YPR079W|YLL006W|YJL004C|YMR203W|YPL063W|YPR055W|YKR093W|YGL200C|YFR021W|YGR218W|YJL207C|YGR245C|YBL075C|YDL217C|YLR268W|YMR150C|YER122C|YHR103W|YMR035W|YOR230W|YKL068W|YJL085W|YDR164C|YER180C-A|YHR083W|YBR102C|YOR109W|YJL034W|YOL111C|YPR149W|YNL13
55114	0.005009	0.16009	26	325	298	6353	oxidation reduction	YEL071W|YAL062W|YER051W|YHR183W|YHL021C|YNR073C|YJL052W|YGR180C|YML086C|YER073W|YBR115C|YNR015W|YJR070C|YKL086W|YER081W|YDR453C|YBL064C|YDL168W|YFL018C|YOR323C|YEL024W|YGL125W|YER070W|YBR256C|YBR221C|YHR037W
31324	0.0050991	0.16009	25	309	298	6353	negative regulation of cellular metabolic process	YOL068C|YIL084C|YHR082C|YMR075W|YKL108W|YML058W|YGL058W|YDR026C|YOR230W|YNL021W|YMR127C|YEL056W|YOL081W|YPL042C|YOL090W|YER169W|YBR112C|YHR071W|YPR149W|YAL021C|YDR207C|YAR003W|YDR293C|YOR144C|YNL206C
51604	0.0051546	0.16009	7	46	298	6353	protein maturation	YMR150C|YBL091C|YFR021W|YMR035W|YCL052C|YLR244C|YGR101W
33365	0.0052598	0.16009	16	168	298	6353	protein localization in organelle	YHR083W|YBL075C|YDL217C|YMR150C|YPL063W|YJL034W|YOL111C|YPL051W|YNL131W|YGL200C|YMR035W|YOR230W|YLL006W|YKL068W|YJL004C|YMR203W
6626	0.0052834	0.16009	8	58	298	6353	protein targeting to mitochondrion	YHR083W|YDL217C|YMR150C|YPL063W|YNL131W|YMR035W|YLL006W|YMR203W
70585	0.0052834	0.16009	8	58	298	6353	protein localization in mitochondrion	YHR083W|YDL217C|YMR150C|YPL063W|YNL131W|YMR035W|YLL006W|YMR203W
16567	0.0058939	0.17328	11	98	298	6353	protein ubiquitination	YOR339C|YNL172W|YOR249C|YIL038C|YPL055C|YLR368W|YLR102C|YIL148W|YGL058W|YJR090C|YGR133W
22616	0.0059969	0.17328	6	36	298	6353	DNA strand elongation	YNL290W|YOL094C|YIR008C|YGL201C|YDL102W|YDL164C
16310	0.0061985	0.17328	23	281	298	6353	phosphorylation	YJL087C|YHR082C|YBL016W|YDR507C|YNL161W|YDR516C|YJL106W|YPL203W|YGL253W|YOR231W|YDR247W|YOR109W|YNL154C|YPL042C|YDR454C|YGR205W|YNL106C|YCL024W|YJR105W|YEL024W|YPL258C|YLR226W|YPL026C
6325	0.0062728	0.17328	21	249	298	6353	chromatin organization	YOL068C|YIL084C|YMR075W|YOR249C|YPL181W|YPL055C|YER051W|YGL058W|YDR359C|YNL021W|YBR135W|YMR127C|YEL056W|YER169W|YBR112C|YML102W|YLR102C|YDR207C|YAR003W|YBR081C|YNL206C
10570	0.0063752	0.17328	2	3	298	6353	regulation of filamentous growth	YPL042C|YHR082C
10648	0.0064049	0.17328	5	26	298	6353	negative regulation of cell communication	YOL081W|YHR082C|YBL016W|YHR071W|YLR452C
44283	0.0067249	0.17857	29	383	298	6353	small molecule biosynthetic process	YLR134W|YBR263W|YNL141W|YMR120C|YJL052W|YLR180W|YHR123W|YJL153C|YER073W|YBR115C|YGR208W|YJL196C|YER081W|YOL052C|YDL168W|YMR062C|YFL018C|YJR105W|YJR103W|YHR037W|YAL062W|YGR180C|YDL045C|YOL140W|YGL125W|YPL258C|YOR323C|YBR256C|YER070W
6544	0.0069494	0.17857	3	9	298	6353	glycine metabolic process	YBR263W|YFL018C|YDR019C
16568	0.0070328	0.17857	18	204	298	6353	chromatin modification	YOL068C|YIL084C|YMR075W|YPL181W|YPL055C|YER051W|YGL058W|YNL021W|YDR359C|YBR135W|YMR127C|YEL056W|YER169W|YBR112C|YDR207C|YAR003W|YBR081C|YNL206C
9056	0.0070721	0.17857	52	795	298	6353	catabolic process	YNL172W|YHR183W|YMR276W|YPL190C|YCR027C|YGL156W|YJL052W|YOL157C|YAL021C|YHR168W|YOR249C|YJL083W|YDR406W|YIL038C|YLR368W|YDR516C|YGL058W|YPL042C|YMR304W|YDR358W|YMR314W|YNR052C|YJR090C|YDR151C|YBR221C|YIL099W|YLR134W|YNL141W|YDL102W|YGR248W|YGL253W|YOR231W
45934	0.0074978	0.18193	21	253	298	6353	negative regulation of nucleobase, nucleoside, nucleotide and nucleic acid metabolic process	YOL068C|YIL084C|YMR075W|YKL108W|YML058W|YGL058W|YDR026C|YOR230W|YNL021W|YMR127C|YEL056W|YOL081W|YPL042C|YOL090W|YER169W|YBR112C|YAL021C|YDR207C|YAR003W|YOR144C|YNL206C
51172	0.0074978	0.18193	21	253	298	6353	negative regulation of nitrogen compound metabolic process	YOL068C|YIL084C|YMR075W|YKL108W|YML058W|YGL058W|YDR026C|YOR230W|YNL021W|YMR127C|YEL056W|YOL081W|YPL042C|YOL090W|YER169W|YBR112C|YAL021C|YDR207C|YAR003W|YOR144C|YNL206C
31938	0.0075653	0.18193	5	27	298	6353	regulation of chromatin silencing at telomere	YIL084C|YPL181W|YJL194W|YOR230W|YNL021W
10605	0.0079561	0.18809	23	287	298	6353	negative regulation of macromolecule metabolic process	YOL068C|YIL084C|YMR075W|YKL108W|YML058W|YGL058W|YDR026C|YOR230W|YLR244C|YNL021W|YMR127C|YEL056W|YPL042C|YOL090W|YER169W|YBR112C|YPR149W|YAL021C|YDR207C|YAR003W|YDR293C|YOR144C|YNL206C
44281	0.0080698	0.18809	62	988	298	6353	small molecule metabolic process	YBR263W|YPL055C|YER051W|YMR120C|YHR183W|YMR042W|YCR027C|YGL156W|YJL052W|YJL153C|YDL189W|YKL035W|YJL196C|YBR030W|YER081W|YJR105W|YEL071W|YHR168W|YBR092C|YLR172C|YDR406W|YOR239W|YDR516C|YGR180C|YJR070C|YOL140W|YJR090C|YOR323C|YPL258C|YBR221C|YIL099W|YLR134W
8104	0.0084662	0.19434	42	619	298	6353	protein localization	YER008C|YHR082C|YPR079W|YLL006W|YJL004C|YMR203W|YNL021W|YCR088W|YPL063W|YPR055W|YKR093W|YGL200C|YFR021W|YGR218W|YJL207C|YGR245C|YBL075C|YDL217C|YLR268W|YMR150C|YER122C|YHR103W|YMR035W|YOR230W|YKL068W|YJL085W|YDR164C|YER180C-A|YHR083W|YBR102C|YOR109W|YJL03
6513	0.0086121	0.19474	4	18	298	6353	protein monoubiquitination	YOR339C|YPL055C|YGL058W|YGR133W
9309	0.0087858	0.19574	14	147	298	6353	amine biosynthetic process	YAL062W|YBR263W|YLR180W|YHR123W|YBR115C|YGR208W|YER081W|YOL140W|YOL052C|YGL125W|YOR323C|YFL018C|YMR062C|YHR037W
19320	0.009135	0.19895	7	51	298	6353	hexose catabolic process	YLR134W|YGR248W|YDR516C|YHR183W|YGL253W|YJL052W|YBR221C
5996	0.0092362	0.19895	13	133	298	6353	monosaccharide metabolic process	YLR134W|YGR248W|YDR516C|YHR183W|YGL253W|YJL052W|YGL156W|YDL189W|YKL035W|YHR047C|YJR090C|YBR221C|YIL099W
6839	0.009494	0.19895	9	77	298	6353	mitochondrial transport	YHR083W|YBL030C|YDL217C|YMR150C|YPL063W|YNL131W|YMR035W|YLL006W|YMR203W
6892	0.009494	0.19895	9	77	298	6353	post-Golgi vesicle-mediated transport	YBR102C|YER008C|YPR055W|YDR358W|YPL051W|YJL085W|YJL004C|YKL135C|YMR183C
45040	0.0095866	0.19895	3	10	298	6353	protein import into mitochondrial outer membrane	YHR083W|YNL131W|YLL006W
[truncated: 205 more columns]

## Sheet: PheNetic_reactor2_small
File created with BiNGO (c) on Jan 22, 2015 at 11:32:21 AM
ontology: namespace
curator: bingo
Selected ontology file : jar:file:/home/driesdm/.cytoscape/2.8/plugins/BiNGO-2.44/BiNGO.jar!/GO_Biological_Process
Selected annotation file : /home/driesdm/gene_ontologies/gene_association.sgd
Discarded evidence codes :
Overrepresentation
Selected statistical test : Hypergeometric test
Selected correction : Benjamini & Hochberg False Discovery Rate (FDR) correction
Selected significance level : 0.2
Testing option : Use whole annotation as reference set
The selected cluster :
YJL087C	YIL084C	YPL190C	YOL081W	YJL153C	YAR071W	YNL182C	YML102W	YOR198C	YJL207C	YGR260W	YDR171W	YKL068W	YDR359C	YGR180C	YMR127C	YBR125C	YPL042C	YER176W	YGL201C	YDL043C	YDR025W	YBR112C	YLR102C	YJR014W	YNR052C	YIL099W	YMR183C	YER008C	YLR134W	YMR284W	YOL001W	YLR352W	YLR310C	YDR365C	YDR454C	YJR022W	YLR121C	YDL168W	YLR226W	YJR103W	YBR295W	YHR103W	YLR233C	YML059C	YCR020C-A	YOL090W	YNL243W	YHR047C	YJL034W
No annotations were retrieved for the following entities:
GO-ID	p-value	corr p-value	x	n	X	N	Description	Genes in test set
6904	4.3262e-05	0.041921	4	13	104	6353	vesicle docking involved in exocytosis	YBR102C|YER008C|YDR164C|YLR148W
48278	0.00039511	0.13053	4	22	104	6353	vesicle docking	YBR102C|YER008C|YDR164C|YLR148W
22406	0.00047231	0.13053	4	23	104	6353	membrane docking	YBR102C|YER008C|YDR164C|YLR148W
9057	0.00055015	0.13053	15	352	104	6353	macromolecule catabolic process	YDL175C|YIL038C|YMR276W|YPL190C|YCL052C|YPL042C|YOL090W|YJL034W|YNR052C|YIL075C|YJR090C|YDR378C|YEL060C|YIL099W|YGL011C
10570	0.00078782	0.13053	2	3	104	6353	regulation of filamentous growth	YHR082C|YPL042C
9987	0.00094676	0.13053	96	5142	104	6353	cellular process	YJL087C|YIL084C|YKR092C|YMR276W|YPL190C|YGL156W|YJL153C|YAR071W|YNL182C|YKL035W|YML102W|YOR198C|YEL059C-A|YHL002W|YJL207C|YOL068C|YGR260W|YBR092C|YJL083W|YDR171W|YIL038C|YOR230W|YKL068W|YDR359C|YMR127C|YGR180C|YBR102C|YBR125C|YPL042C|YDL043C|YGL201C|YJR07
44265	0.0010328	0.13053	14	335	104	6353	cellular macromolecule catabolic process	YDL175C|YIL038C|YMR276W|YPL190C|YCL052C|YPL042C|YOL090W|YJL034W|YNR052C|YIL075C|YJR090C|YDR378C|YEL060C|YGL011C
6887	0.001149	0.13053	5	49	104	6353	exocytosis	YBR102C|YER008C|YNL243W|YDR164C|YLR148W
55129	0.0015588	0.13053	2	4	104	6353	L-proline biosynthetic process	YDR300C|YOR323C
51601	0.0015588	0.13053	2	4	104	6353	exocyst localization	YBR102C|YER008C
1927	0.0015588	0.13053	2	4	104	6353	exocyst assembly	YBR102C|YER008C
51050	0.0020439	0.13053	3	16	104	6353	positive regulation of transport	YPR115W|YDR164C|YIL118W
32940	0.0021028	0.13053	5	56	104	6353	secretion by cell	YBR102C|YER008C|YNL243W|YDR164C|YLR148W
46903	0.0021028	0.13053	5	56	104	6353	secretion	YBR102C|YER008C|YNL243W|YDR164C|YLR148W
32105	0.0025702	0.13053	2	5	104	6353	negative regulation of response to extracellular stimulus	YHR082C|YOL001W
32108	0.0025702	0.13053	2	5	104	6353	negative regulation of response to nutrient levels	YHR082C|YOL001W
32102	0.0025702	0.13053	2	5	104	6353	negative regulation of response to external stimulus	YHR082C|YOL001W
16242	0.0025702	0.13053	2	5	104	6353	negative regulation of macroautophagy	YHR082C|YOL001W
45934	0.0026942	0.13053	11	253	104	6353	negative regulation of nucleobase, nucleoside, nucleotide and nucleic acid metabolic process	YOL068C|YOL081W|YPL042C|YIL084C|YOL090W|YER169W|YBR112C|YOR230W|YMR284W|YOL001W|YMR127C
51172	0.0026942	0.13053	11	253	104	6353	negative regulation of nitrogen compound metabolic process	YOL068C|YOL081W|YPL042C|YIL084C|YOL090W|YER169W|YBR112C|YOR230W|YMR284W|YOL001W|YMR127C
956	0.0028795	0.13287	6	87	104	6353	nuclear-transcribed mRNA catabolic process	YDL175C|YPL042C|YIL038C|YPL190C|YNR052C|YDR378C
6402	0.0030499	0.13433	6	88	104	6353	mRNA catabolic process	YDL175C|YPL042C|YIL038C|YPL190C|YNR052C|YDR378C
45892	0.0033749	0.13508	10	223	104	6353	negative regulation of transcription, DNA-dependent	YOL068C|YPL042C|YIL084C|YOL090W|YER169W|YBR112C|YOR230W|YMR284W|YOL001W|YMR127C
16481	0.0033749	0.13508	10	223	104	6353	negative regulation of transcription	YOL068C|YPL042C|YIL084C|YOL090W|YER169W|YBR112C|YOR230W|YMR284W|YOL001W|YMR127C
51253	0.003485	0.13508	10	224	104	6353	negative regulation of RNA metabolic process	YOL068C|YPL042C|YIL084C|YOL090W|YER169W|YBR112C|YOR230W|YMR284W|YOL001W|YMR127C
6561	0.0038142	0.14136	2	6	104	6353	proline biosynthetic process	YDR300C|YOR323C
10629	0.0039547	0.14136	10	228	104	6353	negative regulation of gene expression	YOL068C|YPL042C|YIL084C|YOL090W|YER169W|YBR112C|YOR230W|YMR284W|YOL001W|YMR127C
6073	0.0043109	0.14136	4	41	104	6353	cellular glucan metabolic process	YKL035W|YHR047C|YMR306W|YIL099W
44042	0.0043109	0.14136	4	41	104	6353	glucan metabolic process	YKL035W|YHR047C|YMR306W|YIL099W
31324	0.0043764	0.14136	12	309	104	6353	negative regulation of cellular metabolic process	YOL068C|YOL081W|YHR082C|YPL042C|YIL084C|YOL090W|YER169W|YBR112C|YOR230W|YMR284W|YOL001W|YMR127C
9892	0.0049742	0.15057	12	314	104	6353	negative regulation of metabolic process	YOL068C|YOL081W|YHR082C|YPL042C|YIL084C|YOL090W|YER169W|YBR112C|YOR230W|YMR284W|YOL001W|YMR127C
50789	0.0052411	0.15057	35	1422	104	6353	regulation of biological process	YJL087C|YHR082C|YIL084C|YMR284W|YOL001W|YIL118W|YOL081W|YLR310C|YNL182C|YER169W|YPR115W|YOR198C|YIL075C|YLR226W|YOL068C|YJL083W|YIL038C|YOR230W|YKL068W|YDR164C|YDR359C|YMR127C|YPL042C|YML059C|YER176W|YNL309W|YOL090W|YBR112C|YMR306W|YNR052C|YBL064C|YJR090C
289	0.005283	0.15057	2	7	104	6353	nuclear-transcribed mRNA poly(A) tail shortening	YIL038C|YNR052C
10507	0.005283	0.15057	2	7	104	6353	negative regulation of autophagy	YHR082C|YOL001W
9890	0.0056672	0.15254	11	279	104	6353	negative regulation of biosynthetic process	YOL068C|YOL081W|YPL042C|YIL084C|YOL090W|YER169W|YBR112C|YOR230W|YMR284W|YOL001W|YMR127C
31327	0.0056672	0.15254	11	279	104	6353	negative regulation of cellular biosynthetic process	YOL068C|YOL081W|YPL042C|YIL084C|YOL090W|YER169W|YBR112C|YOR230W|YMR284W|YOL001W|YMR127C
6066	0.0058377	0.15288	10	241	104	6353	alcohol metabolic process	YLR134W|YML059C|YJL153C|YCR048W|YKL035W|YHR047C|YJR090C|YDL168W|YGL156W|YIL099W
48585	0.0069691	0.17771	2	8	104	6353	negative regulation of response to stimulus	YHR082C|YOL001W
55	0.0075448	0.18372	3	25	104	6353	ribosomal large subunit export from nucleus	YNR053C|YGR218W|YAL059W
6401	0.0075839	0.18372	6	106	104	6353	RNA catabolic process	YDL175C|YPL042C|YIL038C|YPL190C|YNR052C|YDR378C
10648	0.0084288	0.19089	3	26	104	6353	negative regulation of cell communication	YOL081W|YHR082C|YOL001W
16071	0.0085148	0.19089	11	295	104	6353	mRNA metabolic process	YDL175C|YBR102C|YJL087C|YPL042C|YDL043C|YIL038C|YJR022W|YOR198C|YPL190C|YNR052C|YDR378C
6560	0.008865	0.19089	2	9	104	6353	proline metabolic process	YDR300C|YOR323C
9895	0.008865	0.19089	2	9	104	6353	negative regulation of catabolic process	YHR082C|YOL001W
31330	0.008865	0.19089	2	9	104	6353	negative regulation of cellular catabolic process	YHR082C|YOL001W
32879	0.0092318	0.19112	5	79	104	6353	regulation of localization	YPR115W|YOL001W|YDR164C|YIL118W|YLR148W
51276	0.009908	0.19112	14	430	104	6353	chromosome organization	YOL068C|YIL084C|YMR284W|YLR233C|YKL068W|YDR359C|YMR127C|YHL006C|YOL090W|YER169W|YML102W|YBR112C|YLR102C|YLR226W
50794	0.010102	0.19112	33	1373	104	6353	regulation of cellular process	YJL087C|YHR082C|YIL084C|YMR284W|YOL001W|YIL118W|YOL081W|YLR310C|YNL182C|YER169W|YOR198C|YLR226W|YOL068C|YJL083W|YIL038C|YOR230W|YKL068W|YDR164C|YDR359C|YMR127C|YPL042C|YML059C|YER176W|YNL309W|YOL090W|YBR112C|YMR306W|YNR052C|YBL064C|YJR090C|YDR398W|YBR260C
10558	0.010289	0.19112	10	262	104	6353	negative regulation of macromolecule biosynthetic process	YOL068C|YPL042C|YIL084C|YOL090W|YER169W|YBR112C|YOR230W|YMR284W|YOL001W|YMR127C
5977	0.010373	0.19112	3	28	104	6353	glycogen metabolic process	YKL035W|YHR047C|YIL099W
65007	0.010405	0.19112	38	1647	104	6353	biological regulation	YJL087C|YHR082C|YIL084C|YMR284W|YOL001W|YIL118W|YOL081W|YLR310C|YNL182C|YER169W|YPR115W|YOR198C|YIL075C|YLR226W|YOL068C|YBR295W|YJL083W|YIL038C|YOR230W|YLR233C|YKL068W|YDR164C|YDR359C|YMR127C|YPL042C|YML059C|YER176W|YNL309W|YOL090W|YBR112C|YMR306W|YBL064C
947	0.010964	0.19112	2	10	104	6353	amino acid catabolic process to alcohol via Ehrlich pathway	YLR134W|YDL168W
31338	0.010964	0.19112	2	10	104	6353	regulation of vesicle fusion	YDR164C|YLR148W
19318	0.011122	0.19112	6	115	104	6353	hexose metabolic process	YLR134W|YKL035W|YHR047C|YJR090C|YGL156W|YIL099W
9084	0.011434	0.19112	3	29	104	6353	glutamine family amino acid biosynthetic process	YDR300C|YMR062C|YOR323C
6112	0.012556	0.19112	3	30	104	6353	energy reserve metabolic process	YKL035W|YHR047C|YIL099W
44264	0.012975	0.19112	4	56	104	6353	cellular polysaccharide metabolic process	YKL035W|YHR047C|YMR306W|YIL099W
61186	0.013258	0.19112	2	11	104	6353	negative regulation of chromatin silencing at silent mating-type cassette	YIL084C|YOR230W
32107	0.013258	0.19112	2	11	104	6353	regulation of response to nutrient levels	YHR082C|YOL001W
32104	0.013258	0.19112	2	11	104	6353	regulation of response to extracellular stimulus	YHR082C|YOL001W
32101	0.013258	0.19112	2	11	104	6353	regulation of response to external stimulus	YHR082C|YOL001W
955	0.013258	0.19112	2	11	104	6353	amino acid catabolic process via Ehrlich pathway	YLR134W|YDL168W
16241	0.013258	0.19112	2	11	104	6353	regulation of macroautophagy	YHR082C|YOL001W
51274	0.013258	0.19112	2	11	104	6353	beta-glucan biosynthetic process	YKL035W|YMR306W
51049	0.013782	0.19112	4	57	104	6353	regulation of transport	YPR115W|YDR164C|YIL118W|YLR148W
48523	0.015491	0.19112	13	409	104	6353	negative regulation of cellular process	YOL068C|YOL081W|YHR082C|YPL042C|YIL084C|YOL090W|YER169W|YBR112C|YOR230W|YMR284W|YJR090C|YOL001W|YMR127C
40029	0.015698	0.19112	6	124	104	6353	regulation of gene expression, epigenetic	YOL068C|YIL084C|YOL090W|YOR230W|YMR284W|YMR127C
43570	0.015741	0.19112	2	12	104	6353	maintenance of DNA repeat elements	YHL006C|YOL090W
46686	0.015741	0.19112	2	12	104	6353	response to cadmium ion	YBR295W|YBL064C
71034	0.015741	0.19112	2	12	104	6353	CUT catabolic process	YDL175C|YPL190C
71043	0.015741	0.19112	2	12	104	6353	CUT metabolic process	YDL175C|YPL190C
6508	0.016055	0.19112	11	323	104	6353	proteolysis	YMR150C|YJL034W|YHR047C|YMR276W|YIL075C|YJR090C|YEL059C-A|YLR121C|YEL060C|YCL052C|YGL011C
60627	0.016288	0.19112	3	33	104	6353	regulation of vesicle-mediated transport	YDR164C|YIL118W|YLR148W
33182	0.01637	0.19112	1	1	104	6353	regulation of histone ubiquitination	YLR226W
33184	0.01637	0.19112	1	1	104	6353	positive regulation of histone ubiquitination	YLR226W
45926	0.01637	0.19112	1	1	104	6353	negative regulation of growth	YPL042C
6747	0.01637	0.19112	1	1	104	6353	FAD biosynthetic process	YDL045C
60258	0.01637	0.19112	1	1	104	6353	negative regulation of filamentous growth	YPL042C
31648	0.01637	0.19112	1	1	104	6353	protein destabilization	YPL042C
15890	0.01637	0.19112	1	1	104	6353	nicotinamide mononucleotide transport	YGR260W
34638	0.01637	0.19112	1	1	104	6353	phosphatidylcholine catabolic process	YML059C
6069	0.01637	0.19112	1	1	104	6353	ethanol oxidation	YDL168W
46443	0.01637	0.19112	1	1	104	6353	FAD metabolic process	YDL045C
48518	0.016858	0.19329	12	369	104	6353	positive regulation of biological process	YJL087C|YPL042C|YIL084C|YIL038C|YPR115W|YOR230W|YNR052C|YKL068W|YDR398W|YDR164C|YIL118W|YLR226W
6996	0.017165	0.19329	30	1262	104	6353	organelle organization	YER008C|YIL084C|YMR276W|YMR284W|YIL118W|YLR310C|YNL182C|YER169W|YML102W|YLR022C|YEL059C-A|YLR226W|YOL068C|YMR150C|YDR171W|YLR233C|YKL068W|YDR359C|YMR127C|YHL006C|YOL090W|YNL243W|YJL034W|YBR112C|YDR025W|YJR070C|YLR102C|YNL126W|YLR148W|YMR183C
48519	0.018261	0.19329	13	418	104	6353	negative regulation of biological process	YOL068C|YOL081W|YHR082C|YPL042C|YIL084C|YOL090W|YER169W|YBR112C|YOR230W|YMR284W|YJR090C|YOL001W|YMR127C
90054	0.018407	0.19329	2	13	104	6353	regulation of chromatin silencing at silent mating-type cassette	YIL084C|YOR230W
51273	0.018407	0.19329	2	13	104	6353	beta-glucan metabolic process	YKL035W|YMR306W
6067	0.018407	0.19329	2	13	104	6353	ethanol metabolic process	YLR134W|YDL168W
34308	0.018407	0.19329	2	13	104	6353	monohydric alcohol metabolic process	YLR134W|YDL168W
10605	0.018544	0.19329	10	287	104	6353	negative regulation of macromolecule metabolic process	YOL068C|YPL042C|YIL084C|YOL090W|YER169W|YBR112C|YOR230W|YMR284W|YOL001W|YMR127C
16043	0.018657	0.19329	39	1763	104	6353	cellular component organization	YER008C|YIL084C|YMR276W|YPL190C|YMR284W|YIL118W|YLR310C|YNL182C|YER169W|YML102W|YLR022C|YIL075C|YEL059C-A|YLR121C|YLR226W|YOL068C|YMR150C|YJL083W|YDR171W|YHR103W|YLR233C|YKL068W|YDR359C|YMR127C|YBR102C|YHL006C|YOL090W|YDL043C|YGL201C|YNL243W|YJL034W|YJR07
31326	0.019078	0.19329	22	855	104	6353	regulation of cellular biosynthetic process	YOL068C|YJL087C|YIL084C|YIL038C|YOR230W|YMR284W|YKL068W|YOL001W|YDR359C|YMR127C|YOL081W|YML059C|YPL042C|YER176W|YNL309W|YOL090W|YNL182C|YER169W|YBR112C|YNR052C|YDR398W|YLR226W
6893	0.019085	0.19329	3	35	104	6353	Golgi to plasma membrane transport	YBR102C|YER008C|YMR183C
9064	0.019298	0.19329	4	63	104	6353	glutamine family amino acid metabolic process	YDR300C|YMR062C|YOR323C|YJR103W
9889	0.019316	0.19329	22	856	104	6353	regulation of biosynthetic process	YOL068C|YJL087C|YIL084C|YIL038C|YOR230W|YMR284W|YKL068W|YOL001W|YDR359C|YMR127C|YOL081W|YML059C|YPL042C|YER176W|YNL309W|YOL090W|YNL182C|YER169W|YBR112C|YNR052C|YDR398W|YLR226W
6006	0.019349	0.19329	5	95	104	6353	glucose metabolic process	YLR134W|YKL035W|YHR047C|YJR090C|YIL099W
[truncated: 54 more columns]

## Sheet: PheNetic_reactor 3
File created with BiNGO (c) on Jan 22, 2015 at 10:26:53 AM
ontology: namespace
curator: bingo
Selected ontology file : jar:file:/home/driesdm/.cytoscape/2.8/plugins/BiNGO-2.44/BiNGO.jar!/GO_Biological_Process
Selected annotation file : /home/driesdm/gene_ontologies/gene_association.sgd
Discarded evidence codes :
Overrepresentation
Selected statistical test : Hypergeometric test
Selected correction : Benjamini & Hochberg False Discovery Rate (FDR) correction
Selected significance level : 0.1
Testing option : Use whole annotation as reference set
The selected cluster :
YDR283C	YLR116W	YHR119W	YBR225W	YMR276W	YNL281W	YER009W	YER139C	YMR317W	YNL154C	YLR421C	YDL054C	YLR291C	YPR137C-A	YML075C	YFL016C	YLR034C	YPL215W	YBR011C	YMR318C	YNL250W	YLR439W	YBR245C	YDL202W	YER095W	YBL045C	YOR157C	YMR024W	YDL095W	YGL197W	YBL054W	YJL098W	YDL047W	YOR317W	YMR246W	YBR082C	YPR052C	YDL159W	YDR129C	YPR125W	YBR268W	YDR405W	YJR132W	YJR042W	YHR026W	YDR206W	YOR374W	YLR310C	YOL108C	YEL030W
No annotations were retrieved for the following entities:
GO-ID	p-value	corr p-value	x	n	X	N	Description	Genes in test set
35336	0.00014125	0.057418	2	2	76	6353	long-chain fatty-acyl-CoA metabolic process	YOR317W|YMR246W
35337	0.00014125	0.057418	2	2	76	6353	fatty-acyl-CoA metabolic process	YOR317W|YMR246W
6637	0.00042046	0.068594	2	3	76	6353	acyl-CoA metabolic process	YOR317W|YMR246W
35383	0.00042046	0.068594	2	3	76	6353	thioester metabolic process	YOR317W|YMR246W
7005	0.00042185	0.068594	12	325	76	6353	mitochondrion organization	YMR024W|YPL215W|YNL185C|YEL030W|YPR125W|YBR268W|YGR174C|YLR439W|YFL016C|YDR405W|YDL202W|YMR012W
[truncated: 26 more columns]

## Sheet: PheNetic_reactor 4
File created with BiNGO (c) on Jan 22, 2015 at 10:28:26 AM
ontology: namespace
curator: bingo
Selected ontology file : jar:file:/home/driesdm/.cytoscape/2.8/plugins/BiNGO-2.44/BiNGO.jar!/GO_Biological_Process
Selected annotation file : /home/driesdm/gene_ontologies/gene_association.sgd
Discarded evidence codes :
Overrepresentation
Selected statistical test : Hypergeometric test
Selected correction : Benjamini & Hochberg False Discovery Rate (FDR) correction
Selected significance level : 0.1
Testing option : Use whole annotation as reference set
The selected cluster :
YCL050C	YBL097W	YLR373C	YAL053W	YDR047W	YMR120C	YMR276W	YNL281W	YIL094C	YHR205W	YHR004C	YCR027C	YPR029C	YJL052W	YAL019W	YJR092W	YNL236W	YKL212W	YJL153C	YGL044C	YFL033C	YJR045C	YBR045C	YDR054C	YBR193C	YAL026C	YHR013C	YLR131C	YNL251C	YGR032W	YDR078C	YPL110C	YDL190C	YJL074C	YOR303W	YJL005W	YGL137W	YKL012W	YNL088W	YGL251C	YJL124C	YIL152W	YOL078W	YDR158W	YML092C	YCL014W	YCL027W	YMR125W	YGL158W	YOR231W
No annotations were retrieved for the following entities:
GO-ID	p-value	corr p-value	x	n	X	N	Description	Genes in test set
35556	1.155e-05	0.0057836	11	152	93	6353	intracellular signal transduction	YBL105C|YJL005W|YFL033C|YCR027C|YJL164C|YLR113W|YOR185C|YOR171C|YLR150W|YOR057W|YOL078W
23034	2.0085e-05	0.0057836	12	192	93	6353	intracellular signaling pathway	YBL105C|YJL005W|YFL033C|YCR027C|YJL164C|YLR113W|YOR185C|YBL047C|YOR171C|YLR150W|YOR057W|YOL078W
9987	2.8504e-05	0.0057836	89	5142	93	6353	cellular process	YCL050C|YBL097W|YLR373C|YAL053W|YDR047W|YMR120C|YMR276W|YNL281W|YIL094C|YHR205W|YHR004C|YCR027C|YPR029C|YAL019W|YJL052W|YJL153C|YKL212W|YNL236W|YJR092W|YGL044C|YJR045C|YFL033C|YDR054C|YBR045C|YBR193C|YAL026C|YHR013C|YLR131C|YNL251C|YGR032W|YDR078C|YPL110C
23052	3.0605e-05	0.0057836	15	305	93	6353	signaling	YCR027C|YOR231W|YJL164C|YOR185C|YBL047C|YOR171C|YOR057W|YLR150W|YBL105C|YDL134C|YIL033C|YJL005W|YFL033C|YLR113W|YOL078W
7165	4.301e-05	0.0057836	14	277	93	6353	signal transduction	YCR027C|YOR231W|YJL164C|YOR185C|YOR171C|YOR057W|YLR150W|YBL105C|YDL134C|YIL033C|YJL005W|YFL033C|YLR113W|YOL078W
23060	4.4753e-05	0.0057836	14	278	93	6353	signal transmission	YCR027C|YOR231W|YJL164C|YOR185C|YOR171C|YOR057W|YLR150W|YBL105C|YDL134C|YIL033C|YJL005W|YFL033C|YLR113W|YOL078W
9056	4.554e-05	0.0057836	26	795	93	6353	catabolic process	YLR373C|YCL050C|YML092C|YMR276W|YCR027C|YMR125W|YOR231W|YGR254W|YAL019W|YJL052W|YBL105C|YKL010C|YPL281C|YFR052W|YDR054C|YOL083W|YFL009W|YMR006C|YNL251C|YKR042W|YOR185C|YDL190C|YPL110C|YML059C|YOR303W|YJL124C
23046	5.4429e-05	0.0060484	14	283	93	6353	signaling process	YCR027C|YOR231W|YJL164C|YOR185C|YOR171C|YOR057W|YLR150W|YBL105C|YDL134C|YIL033C|YJL005W|YFL033C|YLR113W|YOL078W
44248	6.6137e-05	0.0065329	23	669	93	6353	cellular catabolic process	YCL050C|YLR373C|YML092C|YNL251C|YMR276W|YKR042W|YMR125W|YCR027C|YOR231W|YOR185C|YAL019W|YPL110C|YDL190C|YBL105C|YML059C|YOR303W|YKL010C|YFR052W|YDR054C|YFL009W|YOL083W|YMR006C|YJL124C
23033	7.6933e-05	0.0068394	12	220	93	6353	signaling pathway	YBL105C|YJL005W|YFL033C|YCR027C|YJL164C|YLR113W|YOR185C|YBL047C|YOR171C|YLR150W|YOR057W|YOL078W
7049	8.8222e-05	0.0071299	21	589	93	6353	cell cycle	YLR131C|YBL097W|YCL014W|YMR276W|YKR042W|YJL164C|YCR030C|YOR057W|YBL105C|YJR092W|YJL074C|YDL134C|YGL238W|YNL088W|YDR364C|YDR439W|YDR293C|YFL033C|YGL251C|YDR054C|YFL009W
50794	0.00012187	0.0090282	36	1373	93	6353	regulation of cellular process	YCL014W|YCL027W|YNL281W|YCR027C|YHR004C|YHR205W|YGL158W|YOR231W|YGR254W|YBL076C|YAL019W|YOR057W|YLR150W|YBL105C|YNL236W|YOR140W|YDL134C|YIL033C|YFL033C|YBR193C|YBR045C|YLR131C|YNL157W|YGR032W|YKR042W|YJL164C|YOR185C|YOR051C|YOR171C|YML059C|YJL005W|YNL088W
44237	0.00021626	0.014789	72	3792	93	6353	cellular metabolic process	YCL050C|YLR373C|YAL053W|YDR047W|YMR120C|YMR276W|YNL281W|YIL094C|YHR205W|YHR004C|YCR027C|YAL019W|YJL052W|YJL153C|YKL212W|YNL236W|YGL044C|YJR045C|YFL033C|YBR193C|YDR054C|YHR013C|YLR131C|YNL251C|YGR032W|YDR078C|YPL110C|YDL190C|YJL074C|YOR303W|YJL005W|YKL012W
50789	0.00025616	0.016266	36	1422	93	6353	regulation of biological process	YCL014W|YCL027W|YNL281W|YCR027C|YHR004C|YHR205W|YGL158W|YOR231W|YGR254W|YBL076C|YAL019W|YOR057W|YLR150W|YBL105C|YNL236W|YOR140W|YDL134C|YIL033C|YFL033C|YBR193C|YBR045C|YLR131C|YNL157W|YGR032W|YKR042W|YJL164C|YOR185C|YOR051C|YOR171C|YML059C|YJL005W|YNL088W
9395	0.00033832	0.020051	3	10	93	6353	phospholipid catabolic process	YML059C|YMR006C|YPL110C
60237	0.0006072	0.033738	3	12	93	6353	regulation of fungal-type cell wall organization	YBL105C|YDR293C|YOR231W
65007	0.0010964	0.054727	38	1647	93	6353	biological regulation	YCL014W|YCL027W|YNL281W|YCR027C|YHR004C|YHR205W|YGL158W|YOR231W|YGR254W|YBL076C|YAL019W|YOR057W|YLR150W|YBL105C|YNL236W|YOR140W|YDL134C|YIL033C|YJR045C|YFL033C|YBR193C|YBR045C|YLR369W|YLR131C|YNL157W|YGR032W|YKR042W|YJL164C|YOR185C|YOR051C|YOR171C|YML059C
51301	0.0011081	0.054727	12	294	93	6353	cell division	YJL074C|YJR092W|YDL134C|YBL097W|YGL238W|YCL014W|YDR364C|YDR293C|YKR042W|YDR054C|YJL164C|YFL009W
46475	0.001248	0.058391	2	4	93	6353	glycerophospholipid catabolic process	YML059C|YPL110C
34637	0.0013591	0.060413	6	84	93	6353	cellular carbohydrate biosynthetic process	YBR126C|YJL153C|YGR032W|YGL062W|YGR254W|YJL052W
71103	0.0014453	0.061186	6	85	93	6353	DNA conformation change	YJL092W|YBL097W|YNL088W|YDR439W|YGL251C|YAL019W
44238	0.0017991	0.072698	67	3618	93	6353	primary metabolic process	YCL050C|YLR373C|YAL053W|YMR120C|YMR276W|YNL281W|YIL094C|YHR205W|YCR027C|YJL052W|YAL019W|YJL153C|YKL212W|YNL236W|YGL044C|YJR045C|YFL033C|YBR193C|YDR054C|YHR013C|YLR131C|YNL251C|YGR032W|YDR078C|YPL110C|YDL190C|YJL074C|YOR303W|YJL005W|YKL012W|YNL088W|YGL251C
8152	0.0018839	0.072817	72	3997	93	6353	metabolic process	YCL050C|YLR373C|YAL053W|YDR047W|YMR120C|YMR276W|YNL281W|YIL094C|YHR205W|YHR004C|YCR027C|YAL019W|YJL052W|YJL153C|YKL212W|YNL236W|YGL044C|YJR045C|YFL033C|YBR193C|YDR054C|YHR013C|YLR131C|YNL251C|YGR032W|YDR078C|YPL110C|YDL190C|YJL074C|YOR303W|YJL005W|YKL012W
22402	0.0021607	0.0772	16	499	93	6353	cell cycle process	YLR131C|YBL097W|YCL014W|YMR276W|YJR092W|YJL074C|YDL134C|YGL238W|YNL088W|YDR364C|YDR439W|YDR293C|YFL033C|YGL251C|YDR054C|YFL009W
82	0.002171	0.0772	4	38	93	6353	G1/S transition of mitotic cell cycle	YDL134C|YDR364C|YDR054C|YFL009W
6094	0.002483	0.0849	3	19	93	6353	gluconeogenesis	YGL062W|YGR254W|YJL052W
1323	0.0030607	0.097178	2	6	93	6353	age-dependent general metabolic decline involved in chronological cell aging	YFL033C|YHR205W
1324	0.0030607	0.097178	2	6	93	6353	age-dependent response to oxidative stress involved in chronological cell aging	YFL033C|YHR205W
[truncated: 43 more columns]

## Sheet: PheNetic_reactor 5
File created with BiNGO (c) on Jan 22, 2015 at 10:28:00 AM
ontology: namespace
curator: bingo
Selected ontology file : jar:file:/home/driesdm/.cytoscape/2.8/plugins/BiNGO-2.44/BiNGO.jar!/GO_Biological_Process
Selected annotation file : /home/driesdm/gene_ontologies/gene_association.sgd
Discarded evidence codes :
Overrepresentation
Selected statistical test : Hypergeometric test
Selected correction : Benjamini & Hochberg False Discovery Rate (FDR) correction
Selected significance level : 0.1
Testing option : Use whole annotation as reference set
The selected cluster :
YHL038C	YDR087C	YGL227W	YNL163C	YDL003W	YOL081W	YLR058C	YPL069C	YLR103C	YDL017W	YJL115W	YKL022C	YBR002C	YPL165C	YHR154W	YFL038C	YJL074C	YER006W	YBL035C	YGL197W	YDL155W	YOR272W	YDL213C	YLR371W	YKL104C	YPR052C	YGL087C	YPR175W	YMR048W	YOR278W	YDL102W	YLR432W	YPR176C	YER050C	YKR069W	YGR109C	YLR310C	YKR002W	YDL025C	YKR059W	YIL026C	YPL194W	YNR016C	YPL153C	YBR155W	YDL215C	YLR272C	YKL129C	YOR339C	YIL130W
No annotations were retrieved for the following entities:
GO-ID	p-value	corr p-value	x	n	X	N	Description	Genes in test set
7049	2.6407e-11	2.6222e-08	33	589	100	6353	cell cycle	YMR048W|YPR175W|YDL102W|YMR276W|YGR109C|YOR057W|YLR310C|YDL003W|YDL064W|YDL134C|YOL034W|YDL017W|YLR103C|YIL026C|YPL194W|YLR337C|YKL022C|YPL153C|YJL106W|YLR079W|YLR272C|YDL132W|YKL129C|YJL074C|YOR217W|YDL155W|YGL197W|YMR109W|YDR325W|YJR090C|YCL061C|YDL055C
22402	1.3055e-09	6.4816e-07	28	499	100	6353	cell cycle process	YMR048W|YDL102W|YMR276W|YGR109C|YLR310C|YDL003W|YDL064W|YDL134C|YOL034W|YDL017W|YLR103C|YIL026C|YPL194W|YLR337C|YKL022C|YJL106W|YLR079W|YLR272C|YKL129C|YDL132W|YJL074C|YDL155W|YGL197W|YMR109W|YDR325W|YJR090C|YCL061C|YJR068W
278	1.8745e-08	6.2046e-06	20	293	100	6353	mitotic cell cycle	YMR048W|YDL102W|YLR079W|YGR109C|YLR272C|YDL132W|YDL064W|YDL003W|YLR310C|YJL074C|YDL134C|YOR217W|YDL155W|YDR325W|YJR090C|YLR103C|YDL017W|YCL061C|YIL026C|YKL022C
6261	6.8956e-08	1.6394e-05	12	105	100	6353	DNA-dependent DNA replication	YDR489W|YKL045W|YPL153C|YMR048W|YPR175W|YOR217W|YBL035C|YDL102W|YDL017W|YLR103C|YCL061C|YJR068W
51726	8.2548e-08	1.6394e-05	16	203	100	6353	regulation of cell cycle	YMR048W|YPL153C|YDL102W|YJL106W|YLR079W|YGR109C|YOR057W|YLR310C|YDL134C|YDL155W|YDL017W|YJR090C|YEL019C|YCL061C|YPL194W|YJR068W
46148	9.9771e-08	1.6512e-05	7	26	100	6353	pigment biosynthetic process	YOR278W|YDR232W|YPL069C|YDL205C|YGL040C|YKR069W|YML035C
42440	1.3297e-07	1.8862e-05	7	27	100	6353	pigment metabolic process	YOR278W|YDR232W|YPL069C|YDL205C|YGL040C|YKR069W|YML035C
6281	1.8178e-07	2.1013e-05	18	273	100	6353	DNA repair	YGL087C|YKL045W|YPR175W|YMR048W|YPL153C|YDL102W|YHR154W|YDR489W|YDL003W|YOR217W|YOL034W|YLR103C|YDL017W|YEL019C|YCL061C|YPL194W|YPR052C|YJR068W
6260	1.9241e-07	2.1013e-05	13	138	100	6353	DNA replication	YDR489W|YKL045W|YPL153C|YMR048W|YPR175W|YOR217W|YBL035C|YDL102W|YDL017W|YLR103C|YCL061C|YGR109C|YJR068W
22403	2.1161e-07	2.1013e-05	22	406	100	6353	cell cycle phase	YMR048W|YDL102W|YJL106W|YLR079W|YLR272C|YGR109C|YDL132W|YDL064W|YDL003W|YLR310C|YJL074C|YDL134C|YGL197W|YDL155W|YDR325W|YJR090C|YLR103C|YDL017W|YCL061C|YPL194W|YIL026C|YKL022C
6974	3.3651e-07	3.0377e-05	19	316	100	6353	response to DNA damage stimulus	YGL087C|YKL045W|YPR175W|YMR048W|YPL153C|YDL102W|YHR154W|YDR489W|YDL003W|YOR217W|YOL034W|YJR090C|YLR103C|YDL017W|YEL019C|YCL061C|YPL194W|YPR052C|YJR068W
51301	5.51e-07	4.5596e-05	18	294	100	6353	cell division	YGR109C|YLR272C|YDL132W|YKL129C|YDL064W|YDL003W|YLR310C|YJL074C|YDL134C|YOR217W|YHR030C|YDL155W|YMR109W|YDR325W|YDL017W|YIL026C|YLR337C|YKL022C
6950	1.1124e-06	8.4969e-05	29	723	100	6353	response to stress	YGL087C|YDR214W|YMR048W|YPR175W|YDL102W|YJR031C|YOL081W|YDL003W|YHR030C|YOL034W|YDL017W|YLR103C|YEL019C|YPL194W|YJL115W|YKL045W|YPL153C|YHR154W|YFL038C|YKL129C|YDR489W|YIL130W|YOR217W|YMR109W|YJR090C|YCL061C|YLR113W|YPR052C|YJR068W
6782	1.9514e-06	0.00012106	4	7	100	6353	protoporphyrinogen IX biosynthetic process	YOR278W|YDR232W|YDL205C|YGL040C
46501	1.9514e-06	0.00012106	4	7	100	6353	protoporphyrinogen IX metabolic process	YOR278W|YDR232W|YDL205C|YGL040C
33554	2.0539e-06	0.00012106	24	540	100	6353	cellular response to stress	YGL087C|YKL045W|YPL153C|YPR175W|YMR048W|YDL102W|YJR031C|YHR154W|YFL038C|YDR489W|YDL003W|YOR217W|YHR030C|YOL034W|YJR090C|YLR103C|YDL017W|YEL019C|YCL061C|YLR113W|YPL194W|YJL115W|YPR052C|YJR068W
33014	2.3163e-06	0.00012106	5	15	100	6353	tetrapyrrole biosynthetic process	YOR278W|YDR232W|YDL205C|YGL040C|YKR069W
6779	2.3163e-06	0.00012106	5	15	100	6353	porphyrin biosynthetic process	YOR278W|YDR232W|YDL205C|YGL040C|YKR069W
6783	2.3163e-06	0.00012106	5	15	100	6353	heme biosynthetic process	YOR278W|YDR232W|YDL205C|YGL040C|YKR069W
6259	3.0763e-06	0.00014365	22	475	100	6353	DNA metabolic process	YGL087C|YKL045W|YPL153C|YPR175W|YMR048W|YDL102W|YHR154W|YLR272C|YGR109C|YDR489W|YDL003W|YJL074C|YOR217W|YBL035C|YOL034W|YLR103C|YDL017W|YEL019C|YCL061C|YPL194W|YPR052C|YJR068W
33013	3.3273e-06	0.00014365	5	16	100	6353	tetrapyrrole metabolic process	YOR278W|YDR232W|YDL205C|YGL040C|YKR069W
6778	3.3273e-06	0.00014365	5	16	100	6353	porphyrin metabolic process	YOR278W|YDR232W|YDL205C|YGL040C|YKR069W
42168	3.3273e-06	0.00014365	5	16	100	6353	heme metabolic process	YOR278W|YDR232W|YDL205C|YGL040C|YKR069W
44237	3.8188e-06	0.000158	81	3792	100	6353	cellular metabolic process	YDR214W|YHL038C|YLR116W|YDR087C|YJR031C|YMR276W|YGL227W|YNL163C|YDL064W|YDL003W|YLR421C|YLR058C|YIL051C|YOR267C|YKL035W|YOL034W|YPL069C|YGL040C|YNR043W|YLR103C|YDL017W|YMR138W|YJL115W|YKL022C|YDR232W|YBR002C|YHR154W|YFL038C|YDL132W|YER006W|YJL074C|YBL035C
51329	1.5826e-05	0.00062861	9	95	100	6353	interphase of mitotic cell cycle	YLR310C|YDL134C|YDL155W|YDL102W|YJR090C|YLR103C|YLR079W|YGR109C|YDL132W
51325	1.7238e-05	0.00065835	9	96	100	6353	interphase	YLR310C|YDL134C|YDL155W|YDL102W|YJR090C|YLR103C|YLR079W|YGR109C|YDL132W
7067	2.3407e-05	0.0008485	12	181	100	6353	mitosis	YDL064W|YLR310C|YDL003W|YMR048W|YJL074C|YDL155W|YDR325W|YDL017W|YCL061C|YIL026C|YLR272C|YKL022C
7165	2.3925e-05	0.0008485	15	277	100	6353	signal transduction	YMR048W|YPL153C|YFL038C|YOR057W|YOL081W|YLR310C|YDL134C|YHR030C|YGL197W|YML001W|YLR371W|YLR113W|YCL061C|YPL194W|YMR138W
23060	2.4965e-05	0.00085483	15	278	100	6353	signal transmission	YMR048W|YPL153C|YFL038C|YOR057W|YOL081W|YLR310C|YDL134C|YHR030C|YGL197W|YML001W|YLR371W|YLR113W|YCL061C|YPL194W|YMR138W
280	2.6129e-05	0.00086488	12	183	100	6353	nuclear division	YDL064W|YLR310C|YDL003W|YMR048W|YJL074C|YDL155W|YDR325W|YDL017W|YCL061C|YIL026C|YLR272C|YKL022C
23046	3.0785e-05	0.00098612	15	283	100	6353	signaling process	YMR048W|YPL153C|YFL038C|YOR057W|YOL081W|YLR310C|YDL134C|YHR030C|YGL197W|YML001W|YLR371W|YLR113W|YCL061C|YPL194W|YMR138W
87	3.2412e-05	0.0010058	12	187	100	6353	M phase of mitotic cell cycle	YDL064W|YLR310C|YDL003W|YMR048W|YJL074C|YDL155W|YDR325W|YDL017W|YCL061C|YIL026C|YLR272C|YKL022C
23034	4.2083e-05	0.0012663	12	192	100	6353	intracellular signaling pathway	YLR310C|YPL153C|YHR030C|YGL197W|YML001W|YLR371W|YCL061C|YLR113W|YMR138W|YPL194W|YFL038C|YOR057W
48285	4.4293e-05	0.0012936	12	193	100	6353	organelle fission	YDL064W|YLR310C|YDL003W|YMR048W|YJL074C|YDL155W|YDR325W|YDL017W|YCL061C|YIL026C|YLR272C|YKL022C
8299	5.1262e-05	0.0013758	4	14	100	6353	isoprenoid biosynthetic process	YBR003W|YBR002C|YPL069C|YNR043W
6720	5.1262e-05	0.0013758	4	14	100	6353	isoprenoid metabolic process	YBR003W|YBR002C|YPL069C|YNR043W
45005	5.1262e-05	0.0013758	4	14	100	6353	maintenance of fidelity involved in DNA-dependent DNA replication	YMR048W|YPR175W|YDL102W|YCL061C
8152	6.2116e-05	0.0016232	81	3997	100	6353	metabolic process	YDR214W|YHL038C|YLR116W|YDR087C|YJR031C|YMR276W|YGL227W|YNL163C|YDL064W|YDL003W|YLR421C|YLR058C|YIL051C|YOR267C|YKL035W|YOL034W|YPL069C|YGL040C|YNR043W|YLR103C|YDL017W|YMR138W|YJL115W|YKL022C|YDR232W|YBR002C|YHR154W|YFL038C|YDL132W|YER006W|YJL074C|YBL035C
6464	7.1125e-05	0.001811	23	622	100	6353	protein modification process	YGL087C|YPL153C|YBR002C|YDL205C|YKL210W|YJL106W|YPR176C|YOR057W|YDL132W|YDL064W|YOR339C|YDL134C|YKL019W|YHR030C|YOR267C|YJR090C|YDL017W|YDL025C|YEL019C|YLR113W|YDL055C|YJL115W|YKL022C
23052	7.3159e-05	0.0018162	15	305	100	6353	signaling	YMR048W|YPL153C|YFL038C|YOR057W|YOL081W|YLR310C|YDL134C|YHR030C|YGL197W|YML001W|YLR371W|YLR113W|YCL061C|YPL194W|YMR138W
51716	8.721e-05	0.0021122	24	674	100	6353	cellular response to stimulus	YGL087C|YKL045W|YPL153C|YPR175W|YMR048W|YDL102W|YJR031C|YHR154W|YFL038C|YDR489W|YDL003W|YOR217W|YHR030C|YOL034W|YJR090C|YLR103C|YDL017W|YEL019C|YCL061C|YLR113W|YPL194W|YJL115W|YPR052C|YJR068W
32446	0.00010856	0.0025666	9	121	100	6353	protein modification by small protein conjugation	YDL064W|YOR339C|YGL087C|YKL210W|YJR090C|YEL019C|YOR057W|YDL132W|YKL022C
7062	0.00011873	0.0027417	6	50	100	6353	sister chromatid cohesion	YDL003W|YMR048W|YJL074C|YCL061C|YIL026C|YJR068W
44238	0.00012179	0.0027487	75	3618	100	6353	primary metabolic process	YDR214W|YHL038C|YLR116W|YDR087C|YMR276W|YGL227W|YNL163C|YDL064W|YDL003W|YLR421C|YLR058C|YIL051C|YOR267C|YKL035W|YOL034W|YPL069C|YNR043W|YLR103C|YDL017W|YMR138W|YJL115W|YKL022C|YBR002C|YHR154W|YDL132W|YER006W|YJL074C|YBL035C|YDL213C|YOR272W|YJR090C|YCL061C
34641	0.00012562	0.0027719	50	2034	100	6353	cellular nitrogen compound metabolic process	YHL038C|YGL087C|YPR175W|YMR048W|YOR278W|YLR116W|YDL102W|YDR087C|YLR432W|YNL163C|YLL008W|YKR069W|YGR109C|YDL003W|YHR030C|YLR058C|YIL051C|YKL035W|YKR002W|YOL034W|YGL040C|YDL017W|YLR103C|YEL019C|YPL194W|YJL115W|YKL045W|YPL153C|YKL211C|YDR232W|YDL205C|YHR154W
43687	0.00013785	0.0029757	19	479	100	6353	post-translational protein modification	YGL087C|YPL153C|YDL205C|YKL210W|YJL106W|YOR057W|YDL132W|YOR339C|YDL064W|YDL134C|YHR030C|YOR267C|YDL017W|YDL025C|YJR090C|YEL019C|YLR113W|YJL115W|YKL022C
6270	0.0001462	0.0030456	5	33	100	6353	DNA-dependent DNA replication initiation	YKL045W|YPL153C|YBL035C|YDL017W|YLR103C
70	0.00014722	0.0030456	7	74	100	6353	mitotic sister chromatid segregation	YDL003W|YMR048W|YJL074C|YDR325W|YCL061C|YIL026C|YLR272C
23033	0.00015665	0.0031746	12	220	100	6353	signaling pathway	YLR310C|YPL153C|YHR030C|YGL197W|YML001W|YLR371W|YCL061C|YLR113W|YMR138W|YPL194W|YFL038C|YOR057W
9987	0.00016291	0.0032353	94	5142	100	6353	cellular process	YDR214W|YHL038C|YLR116W|YDR087C|YJR031C|YMR276W|YGL227W|YNL163C|YDL064W|YDL003W|YLR421C|YLR058C|YLR191W|YIL051C|YOR267C|YKL035W|YOL034W|YPL069C|YGL040C|YNR043W|YLR103C|YDL017W|YMR138W|YJL115W|YKL022C|YDR232W|YBR002C|YHR154W|YFL038C|YDL132W|YER006W|YJL074C
6271	0.00016928	0.003296	5	34	100	6353	DNA strand elongation involved in DNA replication	YKL045W|YOR217W|YBL035C|YDL102W|YJR068W
50896	0.00018087	0.0034311	29	940	100	6353	response to stimulus	YGL087C|YDR214W|YMR048W|YPR175W|YDL102W|YJR031C|YOL081W|YDL003W|YHR030C|YOL034W|YDL017W|YLR103C|YEL019C|YPL194W|YJL115W|YKL045W|YPL153C|YHR154W|YFL038C|YKL129C|YDR489W|YIL130W|YOR217W|YMR109W|YJR090C|YCL061C|YLR113W|YPR052C|YJR068W
279	0.00018313	0.0034311	15	331	100	6353	M phase	YDL064W|YLR310C|YDL003W|YMR048W|YJL074C|YDL155W|YGL197W|YDR325W|YJL106W|YDL017W|YCL061C|YPL194W|YIL026C|YLR272C|YKL022C
6807	0.00019914	0.0036238	50	2068	100	6353	nitrogen compound metabolic process	YHL038C|YGL087C|YPR175W|YMR048W|YOR278W|YLR116W|YDL102W|YDR087C|YLR432W|YNL163C|YLL008W|YKR069W|YGR109C|YDL003W|YHR030C|YLR058C|YIL051C|YKL035W|YKR002W|YOL034W|YGL040C|YDL017W|YLR103C|YEL019C|YPL194W|YJL115W|YKL045W|YPL153C|YKL211C|YDR232W|YDL205C|YHR154W
44260	0.00020072	0.0036238	62	2796	100	6353	cellular macromolecule metabolic process	YHL038C|YDR214W|YLR116W|YDR087C|YMR276W|YGL227W|YDL003W|YDL064W|YLR421C|YIL051C|YKL035W|YOR267C|YOL034W|YLR103C|YDL017W|YMR138W|YJL115W|YKL022C|YBR002C|YHR154W|YDL132W|YJL074C|YER006W|YBL035C|YDL213C|YOR272W|YJR090C|YCL061C|YKL104C|YPR052C|YGL087C|YMR048W
819	0.00022241	0.0038972	7	79	100	6353	sister chromatid segregation	YDL003W|YMR048W|YJL074C|YDR325W|YCL061C|YIL026C|YLR272C
22616	0.0002237	0.0038972	5	36	100	6353	DNA strand elongation	YKL045W|YOR217W|YBL035C|YDL102W|YJR068W
10032	0.00024533	0.0042002	2	2	100	6353	meiotic chromosome condensation	YDR325W|YLR272C
82	0.00029052	0.0048082	5	38	100	6353	G1/S transition of mitotic cell cycle	YDL134C|YJR090C|YLR079W|YGR109C|YDL132W
7064	0.00029052	0.0048082	5	38	100	6353	mitotic sister chromatid cohesion	YDL003W|YMR048W|YJL074C|YCL061C|YIL026C
725	0.00032949	0.0053637	6	60	100	6353	recombinational repair	YDR489W|YOL034W|YDL017W|YLR103C|YEL019C|YPL194W
18130	0.00040464	0.0064808	7	87	100	6353	heterocycle biosynthetic process	YOR278W|YKL211C|YDR232W|YDL205C|YGL040C|YKR069W|YML035C
32297	0.00041913	0.0066063	3	10	100	6353	negative regulation of DNA-dependent DNA replication initiation	YMR048W|YCL061C|YKL022C
43170	0.00049741	0.0077176	62	2873	100	6353	macromolecule metabolic process	YHL038C|YDR214W|YLR116W|YDR087C|YMR276W|YGL227W|YDL003W|YDL064W|YLR421C|YIL051C|YKL035W|YOR267C|YOL034W|YLR103C|YDL017W|YMR138W|YJL115W|YKL022C|YBR002C|YHR154W|YDL132W|YJL074C|YER006W|YBL035C|YDL213C|YOR272W|YJR090C|YCL061C|YKL104C|YPR052C|YGL087C|YMR048W
70647	0.00052103	0.0079597	9	149	100	6353	protein modification by small protein conjugation or removal	YDL064W|YOR339C|YGL087C|YKL210W|YJR090C|YEL019C|YOR057W|YDL132W|YKL022C
9225	0.00056973	0.0084583	3	11	100	6353	nucleotide-sugar metabolic process	YKL035W|YKL104C|YDL055C
7059	0.00057433	0.0084583	9	151	100	6353	chromosome segregation	YDL003W|YMR048W|YJL074C|YDR325W|YOL034W|YCL061C|YIL026C|YLR272C|YJR068W
48523	0.00058188	0.0084583	16	409	100	6353	negative regulation of cellular process	YPR175W|YMR048W|YGL227W|YHR154W|YLR079W|YLR272C|YOL081W|YDL134C|YGL197W|YJR090C|YDL017W|YLR371W|YCL061C|YLR113W|YJL115W|YKL022C
6996	0.00058773	0.0084583	34	1262	100	6353	organelle organization	YPR175W|YMR048W|YML097C|YMR276W|YJR031C|YNL163C|YLL008W|YER050C|YOR057W|YDL003W|YLR310C|YDL064W|YDL058W|YDL134C|YHR030C|YML001W|YIL051C|YLR191W|YDL017W|YIL026C|YJL115W|YLR337C|YKL022C|YNR016C|YFL038C|YLR272C|YJL074C|YBL035C|YDL155W|YOR272W|YDR325W|YCL061C
35556	0.00060261	0.0085485	9	152	100	6353	intracellular signal transduction	YLR310C|YHR030C|YGL197W|YML001W|YLR371W|YLR113W|YMR138W|YFL038C|YOR057W
50794	0.0006357	0.0088908	36	1373	100	6353	regulation of cellular process	YDR214W|YGL087C|YPR175W|YMR048W|YDL102W|YJR031C|YGL227W|YGR109C|YOR057W|YOL081W|YLR310C|YDL134C|YHR030C|YML001W|YDL017W|YLR103C|YEL019C|YMR138W|YPL194W|YJL115W|YKL022C|YPL153C|YJL106W|YHR154W|YLR079W|YFL038C|YLR272C|YIL130W|YDL155W|YGL197W|YJR090C|YLR371W
48211	0.00072841	0.010039	2	3	100	6353	Golgi vesicle docking	YDL058W|YFL038C
48519	0.00073804	0.010039	16	418	100	6353	negative regulation of biological process	YPR175W|YMR048W|YGL227W|YHR154W|YLR079W|YLR272C|YOL081W|YDL134C|YGL197W|YJR090C|YDL017W|YLR371W|YCL061C|YLR113W|YJL115W|YKL022C
43570	0.00075099	0.010077	3	12	100	6353	maintenance of DNA repeat elements	YMR048W|YCL061C|YLR272C
16567	0.00083215	0.011018	7	98	100	6353	protein ubiquitination	YOR339C|YGL087C|YKL210W|YJR090C|YOR057W|YDL132W|YKL022C
724	0.00096265	0.012578	5	49	100	6353	double-strand break repair via homologous recombination	YDR489W|YOL034W|YDL017W|YLR103C|YEL019C
6302	0.001118	0.014417	7	103	100	6353	double-strand break repair	YDR489W|YDL003W|YOL034W|YHR154W|YDL017W|YLR103C|YEL019C
84	0.0012144	0.01546	3	14	100	6353	S phase of mitotic cell cycle	YDL155W|YDL102W|YLR103C
50789	0.001254	0.015763	36	1422	100	6353	regulation of biological process	YDR214W|YGL087C|YPR175W|YMR048W|YDL102W|YJR031C|YGL227W|YGR109C|YOR057W|YOL081W|YLR310C|YDL134C|YHR030C|YML001W|YDL017W|YLR103C|YEL019C|YMR138W|YPL194W|YJL115W|YKL022C|YPL153C|YJL106W|YHR154W|YLR079W|YFL038C|YLR272C|YIL130W|YDL155W|YGL197W|YJR090C|YLR371W
31570	0.0013121	0.016287	4	31	100	6353	DNA integrity checkpoint	YPL153C|YMR048W|YCL061C|YPL194W
7076	0.0015007	0.017955	3	15	100	6353	mitotic chromosome condensation	YDL003W|YDR325W|YLR272C
51666	0.0015007	0.017955	3	15	100	6353	actin cortical patch localization	YMR109W|YLR337C|YKL129C
51320	0.0015007	0.017955	3	15	100	6353	S phase	YDL155W|YDL102W|YLR103C
43412	0.0016398	0.019384	23	772	100	6353	macromolecule modification	YGL087C|YPL153C|YBR002C|YDL205C|YKL210W|YJL106W|YPR176C|YOR057W|YDL132W|YDL064W|YOR339C|YDL134C|YKL019W|YHR030C|YOR267C|YJR090C|YDL017W|YDL025C|YEL019C|YLR113W|YDL055C|YJL115W|YKL022C
75	0.0019751	0.023074	6	84	100	6353	cell cycle checkpoint	YPL153C|YMR048W|YDL134C|YCL061C|YPL194W|YJR068W
7121	0.0021922	0.025312	3	17	100	6353	bipolar cellular bud site selection	YMR109W|YLR337C|YKL129C
18344	0.0023784	0.027147	2	5	100	6353	protein geranylgeranylation	YKL019W|YPR176C
6273	0.0026008	0.029018	3	18	100	6353	lagging strand elongation	YKL045W|YBL035C|YDL102W
30261	0.0026008	0.029018	3	18	100	6353	chromosome condensation	YDL003W|YDR325W|YLR272C
46165	0.0029834	0.032917	5	63	100	6353	alcohol biosynthetic process	YBR002C|YPL069C|YLR377C|YKL104C|YDL055C
18342	0.0035311	0.037921	2	6	100	6353	protein prenylation	YKL019W|YPR176C
48478	0.0035311	0.037921	2	6	100	6353	replication fork protection	YMR048W|YCL061C
8156	0.0035515	0.037921	3	20	100	6353	negative regulation of DNA replication	YMR048W|YCL061C|YKL022C
6139	0.0042006	0.044375	41	1802	100	6353	nucleobase, nucleoside, nucleotide and nucleic acid metabolic process	YHL038C|YGL087C|YPR175W|YMR048W|YLR116W|YDL102W|YDR087C|YLR432W|YNL163C|YLL008W|YGR109C|YDL003W|YHR030C|YKL035W|YKR002W|YOL034W|YDL017W|YLR103C|YEL019C|YPL194W|YJL115W|YKL045W|YPL153C|YHR154W|YLR272C|YML035C|YDR489W|YIL130W|YER006W|YJL074C|YOR217W|YBL035C
7346	0.0042879	0.044819	6	98	100	6353	regulation of mitotic cell cycle	YLR310C|YDL134C|YDL102W|YDL017W|YEL019C|YPL194W
6725	0.0045075	0.046624	6	99	100	6353	cellular aromatic compound metabolic process	YOR278W|YKL211C|YDR232W|YDL205C|YGL040C|YML035C
70058	0.0048929	0.048105	2	7	100	6353	tRNA gene clustering	YDR325W|YLR272C
16091	0.0048929	0.048105	2	7	100	6353	prenol biosynthetic process	YBR002C|YPL069C
16090	0.0048929	0.048105	2	7	100	6353	prenol metabolic process	YBR002C|YPL069C
16094	0.0048929	0.048105	2	7	100	6353	polyprenol biosynthetic process	YBR002C|YPL069C
16093	0.0048929	0.048105	2	7	100	6353	polyprenol metabolic process	YBR002C|YPL069C
65007	0.0049959	0.048636	38	1647	100	6353	biological regulation	YDR214W|YGL087C|YPR175W|YMR048W|YDL102W|YJR031C|YGL227W|YGR109C|YOR057W|YOL081W|YLR310C|YDL134C|YHR030C|YML001W|YOR267C|YDL017W|YLR103C|YEL019C|YMR138W|YPL194W|YJL115W|YKL022C|YPL153C|YJL106W|YHR154W|YLR079W|YFL038C|YLR272C|YIL130W|YBL035C|YDL155W|YGL197W
6298	0.0053321	0.051405	3	23	100	6353	mismatch repair	YOR217W|YPR052C|YJR068W
51056	0.006139	0.058615	4	47	100	6353	regulation of small GTPase mediated signal transduction	YLR310C|YOL081W|YJR031C|YLR371W
31573	0.0064571	0.061066	2	8	100	6353	intra-S DNA damage checkpoint	YCL061C|YPL194W
7264	0.0066798	0.062194	5	76	100	6353	small GTPase mediated signal transduction	YLR310C|YML001W|YLR371W|YMR138W|YFL038C
44283	0.0067016	0.062194	13	383	100	6353	small molecule biosynthetic process	YPL153C|YKL211C|YLR432W|YBR002C|YLR377C|YKR069W|YML035C|YIL051C|YKL182W|YPL069C|YKL104C|YDL055C|YNR016C
51276	0.007045	0.064775	14	430	100	6353	chromosome organization	YPR175W|YMR048W|YLR272C|YOR057W|YDL003W|YJL074C|YBL035C|YOR272W|YDR325W|YCL061C|YIL026C|YJL115W|YPR052C|YJR068W
77	0.0075657	0.067078	3	26	100	6353	DNA damage checkpoint	YPL153C|YCL061C|YPL194W
727	0.0075657	0.067078	3	26	100	6353	double-strand break repair via break-induced replication	YDR489W|YDL017W|YLR103C
10648	0.0075657	0.067078	3	26	100	6353	negative regulation of cell communication	YOL081W|YLR371W|YLR079W
42770	0.0075657	0.067078	3	26	100	6353	DNA damage response, signal transduction	YPL153C|YCL061C|YPL194W
6468	0.0079076	0.069489	7	146	100	6353	protein amino acid phosphorylation	YPL153C|YHR030C|YOR267C|YJL106W|YDL025C|YDL017W|YLR113W
76	0.0082172	0.070954	2	9	100	6353	DNA replication checkpoint	YMR048W|YCL061C
34724	0.0082172	0.070954	2	9	100	6353	DNA replication-independent nucleosome organization	YPR052C|YJL115W
79	0.0084154	0.071423	3	27	100	6353	regulation of cyclin-dependent protein kinase activity	YDL155W|YLR079W|YGR109C
30174	0.0084154	0.071423	3	27	100	6353	regulation of DNA-dependent DNA replication initiation	YMR048W|YCL061C|YKL022C
51321	0.0089687	0.075474	8	187	100	6353	meiotic cell cycle	YMR048W|YJL074C|YGL197W|YDR325W|YJL106W|YDL017W|YPL194W|YLR272C
16043	0.0092219	0.076953	39	1763	100	6353	cellular component organization	YGL087C|YPR175W|YMR048W|YML097C|YJR031C|YMR276W|YNL163C|YLL008W|YER050C|YOR057W|YDL064W|YDL003W|YLR310C|YDL058W|YDL134C|YHR030C|YML001W|YLR191W|YIL051C|YDL017W|YLR103C|YMR138W|YIL026C|YJL115W|YLR337C|YKL022C|YNR016C|YFL038C|YLR272C|YKL129C|YJL074C|YBL035C
6888	0.0096319	0.079704	5	83	100	6353	ER to Golgi vesicle-mediated transport	YDL058W|YBR002C|YJR031C|YPR176C|YFL038C
90304	0.011106	0.09114	35	1553	100	6353	nucleic acid metabolic process	YHL038C|YGL087C|YPR175W|YMR048W|YLR116W|YDL102W|YDR087C|YLL008W|YGR109C|YDL003W|YHR030C|YKR002W|YOL034W|YDL017W|YLR103C|YEL019C|YPL194W|YJL115W|YKL045W|YPL153C|YHR154W|YLR272C|YDR489W|YER006W|YJL074C|YIL130W|YBL035C|YOR217W|YDL213C|YOR272W|YCL061C|YLR113W
51188	0.011291	0.091901	6	120	100	6353	cofactor biosynthetic process	YOR278W|YBR003W|YDR232W|YDL205C|YGL040C|YKR069W
[truncated: 50 more columns]

## Sheet: PheNetic_reactor 6_large
File created with BiNGO (c) on Jan 22, 2015 at 11:25:36 AM
ontology: namespace
curator: bingo
Selected ontology file : jar:file:/home/driesdm/.cytoscape/2.8/plugins/BiNGO-2.44/BiNGO.jar!/GO_Biological_Process
Selected annotation file : /home/driesdm/gene_ontologies/gene_association.sgd
Discarded evidence codes :
Overrepresentation
Selected statistical test : Hypergeometric test
Selected correction : Benjamini & Hochberg False Discovery Rate (FDR) correction
Selected significance level : 0.2
Testing option : Use whole annotation as reference set
The selected cluster :
YFL036W	YER091C	YML062C	YLR278C	YGR117C	YOR233W	YBR059C	YER051W	YJL166W	YKL079W	YDR004W	YPL240C	YGL208W	YNL236W	YFL007W	YDR181C	YDR356W	YER081W	YPR024W	YOR025W	YJL095W	YIR029W	YPL104W	YNL226W	YKR054C	YBR019C	YKL103C	YML091C	YEL002C	YBR231C	YBR195C	YDL203C	YPL186C	YOL150C	YDR342C	YOR289W	YIL068C	YDR096W	YPL008W	YMR088C	YFR014C	YFR055W	YGL209W	YGR261C	YMR304W	YEL016C	YBR153W	YJL124C	YLL040C	YMR183C
YHR103W	YIL149C	YML072C	YJL085W	YDL191W	YIL159W	YKR098C	YJL199C	YLR120C	YER145C	YDL088C	YLR147C	YBR079C	YMR244W	YOR251C	YKR029C	YBL084C	YGL141W	YGL095C	YOR036W	YMR222C	YMR276W	YLR127C	YJR144W	YMR203W	YDL065C	YDL064W	YKL212W	YLR421C	YNR017W	YOR089C	YAL011W	YER015W	YIL019W	YML106W	YAL026C	YBR198C	YNL020C	YEL071W	YPR093C	YER017C	YNL271C	YNL251C	YOR239W	YGL130W	YDR135C	YAL012W	YCR061W	YER166W	YFL029C
No annotations were retrieved for the following entities:
YJR020W	YDR053W	YJL199C	YOL150C	YAL036C	YOR091W	YNL226W
GO-ID	p-value	corr p-value	x	n	X	N	Description	Genes in test set
16043	3.9643e-10	5.4911e-07	150	1763	351	6353	cellular component organization	YFL036W|YIL084C|YBR059C|YBL088C|YER051W|YDR004W|YPL240C|YNL236W|YFL007W|YDR181C|YKL002W|YDR356W|YJL020C|YGL200C|YOR025W|YJL095W|YPL104W|YGR002C|YDL209C|YKR054C|YML091C|YBR231C|YBR195C|YDL203C|YML043C|YDR096W|YPL008W|YNL307C|YDR359C|YDR189W|YOL082W|YNL131W
6996	6.7376e-10	5.4911e-07	117	1262	351	6353	organelle organization	YFL036W|YIL084C|YBR059C|YBL088C|YER051W|YDR004W|YPL240C|YDR181C|YKL002W|YDR356W|YJL020C|YGL200C|YOR025W|YJL095W|YPL104W|YGR002C|YKR054C|YML091C|YBR231C|YBR195C|YDR096W|YPL008W|YNL307C|YDR359C|YDR189W|YOL082W|YNL131W|YPR116W|YJL187C|YMR183C|YBR262C|YIL016W
50794	7.7021e-09	4.1848e-06	121	1373	351	6353	regulation of cellular process	YML062C|YIL084C|YLR278C|YOR233W|YBR059C|YBL088C|YER051W|YPL240C|YPL070W|YGL208W|YNL236W|YHR061C|YFL007W|YDR181C|YOR025W|YJL095W|YGR002C|YBR020W|YML091C|YBR231C|YDL203C|YML043C|YIL068C|YDR096W|YPL008W|YDR359C|YDR189W|YFR014C|YPL042C|YAL016W|YGL209W|YJL187C
50789	1.7381e-08	7.0828e-06	123	1422	351	6353	regulation of biological process	YML062C|YIL084C|YLR278C|YOR233W|YBR059C|YBL088C|YER051W|YPL240C|YPL070W|YGL208W|YNL236W|YHR061C|YFL007W|YDR181C|YOR025W|YJL095W|YGR002C|YBR020W|YML091C|YBR231C|YDL203C|YML043C|YIL068C|YDR096W|YPL008W|YDR359C|YDR189W|YFR014C|YPL042C|YAL016W|YGL209W|YJL187C
65007	7.6263e-08	2.4862e-05	135	1647	351	6353	biological regulation	YML062C|YIL084C|YLR278C|YOR233W|YBR059C|YBL088C|YER051W|YDR004W|YPL240C|YPL070W|YGL208W|YNL236W|YHR061C|YFL007W|YDR181C|YKL002W|YGL200C|YOR025W|YJL095W|YGR002C|YBR020W|YML091C|YBR231C|YDL203C|YML043C|YIL068C|YDR096W|YPL008W|YDR359C|YDR189W|YFR014C|YPL042C
7049	2.9073e-07	7.8982e-05	62	589	351	6353	cell cycle	YBL084C|YIR006C|YMR032W|YMR276W|YLR127C|YDR004W|YIL050W|YDL064W|YGL127C|YGL173C|YHR061C|YGR103W|YLR229C|YGR002C|YDL209C|YJL157C|YKR054C|YDL179W|YNL271C|YGL250W|YEL002C|YPL008W|YNL307C|YPL042C|YFL029C|YJL098W|YGL075C|YJL187C|YDR451C|YPL242C|YBR057C|YPL116W
43687	5.161e-07	0.00012018	53	479	351	6353	post-translational protein modification	YBL084C|YIL084C|YOR233W|YLR096W|YGL141W|YBR059C|YBL088C|YER051W|YHR188C|YLR127C|YNL021W|YGL208W|YDL064W|YGR274C|YOR138C|YDL013W|YOR025W|YJL095W|YGR002C|YBR198C|YNL020C|YPR093C|YDR096W|YNL307C|YIL030C|YFR014C|YPL042C|YLR240W|YMR304W|YFL029C|YJL187C|YDR331W
9987	1.3059e-06	0.00026607	316	5142	351	6353	cellular process	YFL036W|YER091C|YML062C|YLR278C|YOR233W|YBR059C|YER051W|YJL166W|YKL079W|YDR004W|YPL240C|YGL208W|YNL236W|YFL007W|YDR181C|YDR356W|YPR024W|YER081W|YOR025W|YIR029W|YJL095W|YPL104W|YKR054C|YBR019C|YKL103C|YML091C|YEL002C|YBR231C|YBR195C|YDL203C|YDR342C|YIL068C
8104	7.3785e-06	0.0013363	60	619	351	6353	protein localization	YPR079W|YGL104C|YGL095C|YOR036W|YMR203W|YNL021W|YDL065C|YPL240C|YNR017W|YOR089C|YKL002W|YGL200C|YOR266W|YAL026C|YJL157C|YHL002W|YER017C|YJL110C|YIL068C|YDR189W|YLR240W|YGR261C|YOL082W|YAL023C|YER166W|YLR166C|YNL131W|YLR148W|YLL040C|YMR183C|YGR086C|YCL027W
61024	1.6395e-05	0.0023678	34	287	351	6353	membrane organization	YBR262C|YHR016C|YGR086C|YIR006C|YDR129C|YGL095C|YGL045W|YGL206C|YNL093W|YJL054W|YAL030W|YOR089C|YKL002W|YOR266W|YFR021W|YGL180W|YDR393W|YAL026C|YNR016C|YML072C|YGR181W|YMR258C|YDR189W|YOR109W|YDR135C|YJR135W-A|YER166W|YDR388W|YNL131W|YEL013W|YOR211C|YLR14
16044	1.6395e-05	0.0023678	34	287	351	6353	cellular membrane organization	YBR262C|YHR016C|YGR086C|YIR006C|YDR129C|YGL095C|YGL045W|YGL206C|YNL093W|YJL054W|YAL030W|YOR089C|YKL002W|YOR266W|YFR021W|YGL180W|YDR393W|YAL026C|YNR016C|YML072C|YGR181W|YMR258C|YDR189W|YOR109W|YDR135C|YJR135W-A|YER166W|YDR388W|YNL131W|YEL013W|YOR211C|YLR14
6464	1.7432e-05	0.0023678	59	622	351	6353	protein modification process	YBL084C|YIL084C|YOR233W|YLR096W|YGL141W|YBR059C|YBL088C|YER051W|YHR188C|YLR127C|YNL021W|YGL208W|YDL064W|YGR274C|YOR138C|YDL013W|YOR025W|YJL095W|YGR002C|YBR198C|YNL020C|YPR093C|YEL002C|YDR096W|YNL307C|YIL030C|YFR014C|YPL042C|YLR240W|YMR304W|YAL023C|YFL029C
22402	4.0992e-05	0.0050892	49	499	351	6353	cell cycle process	YBL084C|YIR006C|YMR032W|YMR276W|YLR127C|YDR004W|YGL127C|YDL064W|YGL173C|YHR061C|YGR002C|YJL157C|YKR054C|YDL179W|YGL250W|YNL271C|YPL008W|YNL307C|YPL042C|YFL029C|YJL098W|YGL075C|YJL187C|YDR451C|YPL116W|YBR057C|YDR129C|YCL055W|YGL045W|YMR224C|YLR394W|YBL034C
34613	4.3711e-05	0.0050892	42	405	351	6353	cellular protein localization	YGL104C|YGL095C|YOR036W|YGL206C|YJL004C|YMR203W|YNL021W|YDL065C|YNL093W|YJL054W|YPL240C|YNR017W|YOR089C|YKL002W|YCL008C|YGL200C|YGL180W|YFR021W|YOR266W|YGR188C|YAL026C|YJL157C|YBL037W|YHL002W|YNR016C|YER017C|YDR180W|YJL110C|YIL149C|YGR181W|YMR258C|YJR135W
60627	5.1146e-05	0.0055579	9	33	351	6353	regulation of vesicle-mediated transport	YBR059C|YGL095C|YLR342W|YLR229C|YIL095W|YIL068C|YNL020C|YLR148W|YDR189W
278	6.1568e-05	0.0062722	33	293	351	6353	mitotic cell cycle	YBL084C|YPL116W|YCL055W|YMR032W|YLR127C|YDL064W|YGL173C|YBL034C|YDL164C|YGR188C|YGR002C|YKR054C|YIL026C|YDR118W|YDL179W|YNL271C|YJR053W|YIL131C|YDR180W|YPL008W|YNL307C|YKR088C|YNL309W|YFL029C|YJL098W|YDR364C|YJL030W|YGL075C|YBR279W|YDL088C|YJL187C|YJR017C
6892	6.6359e-05	0.0063626	14	77	351	6353	post-Golgi vesicle-mediated transport	YGL095C|YOR036W|YIL068C|YJL004C|YJL085W|YNL093W|YPL070W|YAL030W|YGR261C|YOR089C|YLR166C|YAL026C|YLR148W|YMR183C
43412	7.8397e-05	0.0068609	67	772	351	6353	macromolecule modification	YBL084C|YIL084C|YGL141W|YOR233W|YLR096W|YBR059C|YBL088C|YER051W|YLR127C|YHR188C|YNL021W|YDL064W|YGL208W|YGR274C|YOR138C|YDL013W|YOR025W|YJL095W|YGR002C|YBR198C|YNL020C|YPR093C|YBR061C|YEL002C|YOR239W|YLR401C|YDR096W|YNL307C|YIL030C|YFR014C|YPL042C|YLR240W
51128	7.9973e-05	0.0068609	27	222	351	6353	regulation of cellular component organization	YBR059C|YCL027W|YGL095C|YPL240C|YGL208W|YKR055W|YHR061C|YLR342W|YLR229C|YGR188C|YJL095W|YEL019C|YIL095W|YNL020C|YNL271C|YIL068C|YDR189W|YLR429W|YAL016W|YIL159W|YPR154W|YJL030W|YBR279W|YDL088C|YJL187C|YJR017C|YLR148W
22403	9.9312e-05	0.0080939	41	406	351	6353	cell cycle phase	YBL084C|YBR057C|YPL116W|YGL045W|YCL055W|YMR032W|YMR224C|YLR127C|YDR004W|YLR394W|YDL064W|YGL127C|YGL173C|YBL034C|YGR188C|YGR002C|YKR054C|YIL026C|YDR118W|YDL179W|YCR010C|YJR053W|YGL250W|YIL131C|YDR180W|YPL008W|YNL307C|YKR088C|YPL042C|YNL309W|YFL029C|YDR364C
45184	0.00011036	0.0083092	51	547	351	6353	establishment of protein localization	YPR079W|YGL104C|YGL095C|YOR036W|YMR203W|YDL065C|YPL240C|YNR017W|YOR089C|YKL002W|YGL200C|YAL026C|YHL002W|YER017C|YIL068C|YDR189W|YLR240W|YGR261C|YOL082W|YAL023C|YLR166C|YER166W|YNL131W|YLL040C|YMR183C|YLR148W|YGL206C|YJL004C|YNL093W|YJL054W|YKR093W|YCL008C
7165	0.00011669	0.0083092	31	277	351	6353	signal transduction	YPL242C|YOR233W|YBL088C|YGL121C|YER020W|YNL093W|YGL208W|YKR055W|YLR422W|YNL180C|YHR061C|YOR089C|YLR229C|YGR188C|YJL095W|YMR068W|YER118C|YLR452C|YJL157C|YPL153C|YJR053W|YHR182W|YJL085W|YFR014C|YAL016W|YLR240W|YJL030W|YDL088C|YBL056W|YJL187C|YOR107W
23060	0.00012478	0.0083092	31	278	351	6353	signal transmission	YPL242C|YOR233W|YBL088C|YGL121C|YER020W|YNL093W|YGL208W|YKR055W|YLR422W|YNL180C|YHR061C|YOR089C|YLR229C|YGR188C|YJL095W|YMR068W|YER118C|YLR452C|YJL157C|YPL153C|YJR053W|YHR182W|YJL085W|YFR014C|YAL016W|YLR240W|YJL030W|YDL088C|YBL056W|YJL187C|YOR107W
15031	0.00012825	0.0083092	50	536	351	6353	protein transport	YPR079W|YGL104C|YGL095C|YOR036W|YMR203W|YDL065C|YPL240C|YNR017W|YOR089C|YKL002W|YGL200C|YAL026C|YHL002W|YER017C|YIL068C|YDR189W|YLR240W|YGR261C|YOL082W|YAL023C|YLR166C|YER166W|YNL131W|YLL040C|YMR183C|YLR148W|YGL206C|YJL004C|YNL093W|YJL054W|YKR093W|YCL008C
16568	0.00013034	0.0083092	25	204	351	6353	chromatin modification	YIL084C|YMR075W|YPL116W|YIL131C|YBL088C|YBR231C|YGL150C|YER051W|YDR485C|YDR096W|YDR359C|YNL021W|YAL019W|YBR135W|YGR274C|YBL052C|YDR227W|YDR181C|YAL011W|YOR025W|YAR003W|YGR002C|YOR064C|YBR198C|YKR029C
6468	0.00013631	0.0083092	20	146	351	6353	protein amino acid phosphorylation	YDR122W|YPL153C|YOR233W|YLR096W|YBR059C|YBL088C|YNL307C|YGL208W|YPL042C|YFR014C|YLR240W|YFL029C|YKL025C|YGL180W|YJL095W|YGR188C|YIL095W|YJL187C|YNL020C|YBR028C
70727	0.00013994	0.0083092	42	426	351	6353	cellular macromolecule localization	YGL104C|YGL095C|YOR036W|YGL206C|YJL004C|YMR203W|YNL021W|YDL065C|YNL093W|YJL054W|YPL240C|YNR017W|YOR089C|YKL002W|YCL008C|YGL200C|YGL180W|YFR021W|YOR266W|YGR188C|YAL026C|YJL157C|YBL037W|YHL002W|YNR016C|YER017C|YDR180W|YJL110C|YIL149C|YGR181W|YMR258C|YJR135W
7010	0.00015252	0.0083092	25	206	351	6353	cytoskeleton organization	YPL242C|YHR016C|YDR129C|YIR006C|YJR108W|YBR059C|YMR276W|YDL064W|YCR088W|YBR108W|YBL034C|YJL020C|YDR356W|YGR188C|YMR068W|YKR054C|YIL095W|YNL020C|YNL271C|YOR239W|YIL149C|YKR088C|YLR429W|YIL159W|YGL075C
44087	0.00016199	0.0083092	12	64	351	6353	regulation of cellular component biogenesis	YGL208W|YKR055W|YGR229C|YIL159W|YNL271C|YGL095C|YCL027W|YLR229C|YIL068C|YJR017C|YLR148W|YDR189W
19676	0.00016729	0.0083092	3	3	351	6353	ammonia assimilation cycle	YAL062W|YOR375C|YDL171C
33499	0.00016729	0.0083092	3	3	351	6353	galactose catabolic process via UDP-galactose	YBR020W|YBR018C|YBR019C
6476	0.00016794	0.0083092	7	23	351	6353	protein amino acid deacetylation	YIL084C|YMR075W|YPL116W|YOR025W|YNL021W|YKR029C|YPL015C
44265	0.00017002	0.0083092	35	335	351	6353	cellular macromolecule catabolic process	YBL084C|YGL141W|YMR276W|YMR224C|YLR127C|YCL039W|YAL019W|YDL097C|YDR206W|YLR421C|YGL173C|YDR181C|YKL002W|YCL008C|YPR024W|YER146W|YDR118W|YKL103C|YOR076C|YDL111C|YNL251C|YIL030C|YOR157C|YHR204W|YIL017C|YPL042C|YKR098C|YBR173C|YMR304W|YOL082W|YAL023C|YER049W
23046	0.00017332	0.0083092	31	283	351	6353	signaling process	YPL242C|YOR233W|YBL088C|YGL121C|YER020W|YNL093W|YGL208W|YKR055W|YLR422W|YNL180C|YHR061C|YOR089C|YLR229C|YGR188C|YJL095W|YMR068W|YER118C|YLR452C|YJL157C|YPL153C|YJR053W|YHR182W|YJL085W|YFR014C|YAL016W|YLR240W|YJL030W|YDL088C|YBL056W|YJL187C|YOR107W
9057	0.00021009	0.0096549	36	352	351	6353	macromolecule catabolic process	YBL084C|YGL141W|YMR276W|YMR224C|YLR127C|YCL039W|YAL019W|YDL097C|YDR206W|YLR421C|YGL173C|YDR181C|YKL002W|YCL008C|YPR024W|YER146W|YDR118W|YKL103C|YOR076C|YER017C|YDL111C|YNL251C|YIL030C|YOR157C|YHR204W|YIL017C|YPL042C|YKR098C|YBR173C|YMR304W|YOL082W|YAL023C
33036	0.00021557	0.0096549	63	738	351	6353	macromolecule localization	YML062C|YPR079W|YGL104C|YGL095C|YOR036W|YMR203W|YNL021W|YDL065C|YPL240C|YNR017W|YOR089C|YKL002W|YGL200C|YOR266W|YAL026C|YJL157C|YHL002W|YER017C|YJL110C|YIL068C|YLR193C|YDR189W|YLR240W|YGR261C|YOL082W|YAL023C|YER166W|YLR166C|YNL131W|YMR246W|YLR148W|YLL040C
30036	0.00021916	0.0096549	15	96	351	6353	actin cytoskeleton organization	YPL242C|YHR016C|YNL271C|YIR006C|YDR129C|YBR059C|YOR239W|YCR088W|YLR429W|YBR108W|YIL159W|YJL020C|YMR068W|YIL095W|YNL020C
48523	0.00024185	0.010374	40	409	351	6353	negative regulation of cellular process	YGR231C|YIL084C|YMR075W|YGL150C|YCL055W|YCL039W|YOL001W|YNL021W|YAL019W|YDR206W|YNL236W|YDR181C|YOR025W|YGR188C|YLR452C|YJL157C|YPL015C|YNL271C|YIL131C|YJL110C|YDR096W|YIL068C|YPL008W|YAL016W|YPL042C|YIL017C|YLR429W|YIL159W|YGL209W|YBL052C|YDR227W|YPR154W
44248	0.00026627	0.010739	58	669	351	6353	cellular catabolic process	YBL084C|YLR044C|YGL141W|YMR276W|YLR127C|YCL039W|YER020W|YAL019W|YLR421C|YGL173C|YDR181C|YKL002W|YPR024W|YKL209C|YJL095W|YIR029W|YDL238C|YKR054C|YKL103C|YNL251C|YIL030C|YOR157C|YHR204W|YPL042C|YLR240W|YFR055W|YDR135C|YMR304W|YOL082W|YAL023C|YLR249W|YMR161W
6887	0.00027649	0.010739	10	49	351	6353	exocytosis	YDR122W|YAL030W|YLR096W|YGL095C|YLR166C|YKL079W|YJL085W|YIL068C|YLR148W|YDR189W
16570	0.00027671	0.010739	15	98	351	6353	histone modification	YIL084C|YMR075W|YPL116W|YBL088C|YER051W|YDR096W|YNL021W|YGR274C|YBL052C|YOR025W|YAR003W|YGR002C|YOR064C|YBR198C|YKR029C
16569	0.00027671	0.010739	15	98	351	6353	covalent chromatin modification	YIL084C|YMR075W|YPL116W|YBL088C|YER051W|YDR096W|YNL021W|YGR274C|YBL052C|YOR025W|YAR003W|YGR002C|YOR064C|YBR198C|YKR029C
16925	0.00028698	0.010878	5	12	351	6353	protein sumoylation	YDL064W|YDR390C|YDL013W|YEL019C|YLR394W
48519	0.00038088	0.01411	40	418	351	6353	negative regulation of biological process	YGR231C|YIL084C|YMR075W|YGL150C|YCL055W|YCL039W|YOL001W|YNL021W|YAL019W|YDR206W|YNL236W|YDR181C|YOR025W|YGR188C|YLR452C|YJL157C|YPL015C|YNL271C|YIL131C|YJL110C|YDR096W|YIL068C|YPL008W|YAL016W|YPL042C|YIL017C|YLR429W|YIL159W|YGL209W|YBL052C|YDR227W|YPR154W
6895	0.00039992	0.014486	6	19	351	6353	Golgi to endosome transport	YOR089C|YGL095C|YJL004C|YNL093W|YLR148W|YPL070W
30029	0.00043177	0.015012	15	102	351	6353	actin filament-based process	YPL242C|YHR016C|YNL271C|YIR006C|YDR129C|YBR059C|YOR239W|YCR088W|YLR429W|YBR108W|YIL159W|YJL020C|YMR068W|YIL095W|YNL020C
16192	0.00043287	0.015012	37	379	351	6353	vesicle-mediated transport	YHR016C|YGR086C|YIR006C|YDR129C|YLR096W|YGL095C|YGL045W|YOR036W|YGL206C|YKL079W|YJL004C|YNL093W|YPL070W|YAL030W|YOR089C|YKL002W|YCL008C|YGL200C|YFR021W|YAL026C|YBL037W|YHL002W|YDR122W|YJL085W|YIL068C|YMR258C|YDR170C|YDR189W|YKR088C|YOR109W|YGR261C|YER166W
6325	0.0005365	0.018219	27	249	351	6353	chromatin organization	YIL084C|YMR075W|YPL116W|YBL088C|YGL150C|YER051W|YDR485C|YAL019W|YNL021W|YBR135W|YGR274C|YDR181C|YAL011W|YOR025W|YGR002C|YOR064C|YBR198C|YBR231C|YIL131C|YBR195C|YDR096W|YDR359C|YBL052C|YDR227W|YAR003W|YBR279W|YKR029C
23052	0.00065012	0.021146	31	305	351	6353	signaling	YPL242C|YOR233W|YBL088C|YGL121C|YER020W|YNL093W|YGL208W|YKR055W|YLR422W|YNL180C|YHR061C|YOR089C|YLR229C|YGR188C|YJL095W|YMR068W|YER118C|YLR452C|YJL157C|YPL153C|YJR053W|YHR182W|YJL085W|YFR014C|YAL016W|YLR240W|YJL030W|YDL088C|YBL056W|YJL187C|YOR107W
147	0.00066161	0.021146	5	14	351	6353	actin cortical patch assembly	YCR088W|YBR108W|YIR006C|YIL095W|YNL020C
43486	0.00066161	0.021146	5	14	351	6353	histone exchange	YBR231C|YGL150C|YAL011W|YGR002C|YDR485C
51276	0.00067589	0.021187	40	430	351	6353	chromosome organization	YIL084C|YMR075W|YPL116W|YBL088C|YGL150C|YER051W|YDR485C|YDR004W|YLR394W|YNL021W|YAL019W|YBR135W|YGL127C|YGR274C|YDR181C|YDL013W|YAL011W|YOR025W|YGR188C|YGR002C|YOR064C|YKR054C|YBR198C|YIL026C|YIL131C|YBR231C|YBR195C|YDR180W|YIL149C|YDR096W|YDR359C|YNL307C
6886	0.00069623	0.021412	34	347	351	6353	intracellular protein transport	YGL104C|YGL095C|YGL206C|YOR036W|YJL004C|YMR203W|YDL065C|YNL093W|YJL054W|YPL240C|YNR017W|YOR089C|YCL008C|YFR021W|YGL180W|YAL026C|YBL037W|YHL002W|YNR016C|YER017C|YIL149C|YGR181W|YMR258C|YJR135W-A|YGR261C|YOL082W|YAL023C|YER166W|YNL131W|YEL013W|YIL022W|YLR14
16575	0.00072794	0.021969	6	21	351	6353	histone deacetylation	YIL084C|YMR075W|YPL116W|YOR025W|YNL021W|YKR029C
51641	0.00074127	0.021969	66	818	351	6353	cellular localization	YML062C|YPR079W|YGL104C|YLR096W|YGL095C|YOR036W|YKL079W|YMR203W|YNL021W|YDL065C|YPL240C|YPL070W|YNR017W|YAL030W|YOR089C|YKL002W|YGL200C|YOR266W|YAL026C|YJL157C|YKR054C|YHL002W|YER017C|YNL271C|YJL110C|YIL068C|YDR189W|YLR429W|YGR261C|YOL082W|YAL023C|YER166W
80	0.00080196	0.022933	7	29	351	6353	G1 phase of mitotic cell cycle	YGL173C|YIL131C|YFL029C|YCL055W|YBR279W|YJR017C|YDR451C
51318	0.00080196	0.022933	7	29	351	6353	G1 phase	YGL173C|YIL131C|YFL029C|YCL055W|YBR279W|YJR017C|YDR451C
32940	0.00084821	0.023434	10	56	351	6353	secretion by cell	YDR122W|YAL030W|YLR096W|YGL095C|YLR166C|YKL079W|YJL085W|YIL068C|YLR148W|YDR189W
46903	0.00084821	0.023434	10	56	351	6353	secretion	YDR122W|YAL030W|YLR096W|YGL095C|YLR166C|YKL079W|YJL085W|YIL068C|YLR148W|YDR189W
6897	0.00089604	0.023824	14	98	351	6353	endocytosis	YHR016C|YGR086C|YIR006C|YDR129C|YGL045W|YGL206C|YMR258C|YNL093W|YOR109W|YAL030W|YOR089C|YER166W|YDR388W|YAL026C
35542	0.00092453	0.023824	4	9	351	6353	regulation of SNARE complex assembly	YGL095C|YIL068C|YLR148W|YDR189W
30163	0.00093559	0.023824	24	219	351	6353	protein catabolic process	YBL084C|YER017C|YGL141W|YMR276W|YLR127C|YCL039W|YIL030C|YDL097C|YHR204W|YOR157C|YIL017C|YLR421C|YKR098C|YBR173C|YAL023C|YOL082W|YDR181C|YMR304W|YKL002W|YCL008C|YMR161W|YPR024W|YDR118W|YKL103C
9056	0.00095977	0.023824	64	795	351	6353	catabolic process	YBL084C|YLR044C|YGL141W|YMR276W|YLR127C|YCL039W|YER020W|YAL019W|YKL060C|YLR421C|YGL173C|YDR181C|YKL002W|YPR024W|YKL209C|YJL095W|YIR029W|YDL238C|YKR054C|YBR019C|YKL103C|YER017C|YBR020W|YNL251C|YIL030C|YOR157C|YHR204W|YPL042C|YLR240W|YFR055W|YDR135C|YMR304W
33043	0.00097262	0.023824	19	157	351	6353	regulation of organelle organization	YNL271C|YGL095C|YIL068C|YPL240C|YDR189W|YKR055W|YLR429W|YAL016W|YIL159W|YPR154W|YJL030W|YGR188C|YLR229C|YBR279W|YDL088C|YEL019C|YJL187C|YJR017C|YLR148W
7034	0.0009762	0.023824	18	145	351	6353	vacuolar transport	YPR079W|YGL104C|YGL095C|YOR036W|YMR258C|YNL093W|YPL070W|YOR089C|YGR261C|YKL002W|YOL082W|YCL008C|YGL180W|YFR021W|YEL013W|YHL002W|YLR148W|YLL040C
51049	0.00097926	0.023824	10	57	351	6353	regulation of transport	YBR059C|YGL095C|YLR342W|YPR115W|YLR229C|YIL095W|YIL068C|YNL020C|YLR148W|YDR189W
10639	0.00097926	0.023824	10	57	351	6353	negative regulation of organelle organization	YAL016W|YLR429W|YIL159W|YNL271C|YPR154W|YJL030W|YDL088C|YGR188C|YIL068C|YJR017C
51179	0.0011003	0.026376	98	1341	351	6353	localization	YPR079W|YML062C|YLR096W|YGL104C|YIR006C|YGL095C|YOR036W|YKL079W|YMR203W|YNL021W|YDL065C|YPL070W|YPL240C|YNR017W|YAL030W|YOR089C|YKL002W|YGL200C|YOR266W|YKL209C|YAL026C|YKR054C|YJL157C|YHL002W|YER017C|YNL271C|YJL110C|YDR342C|YIL068C|YMR088C|YLR193C|YDR189W
31323	0.0011863	0.028024	78	1021	351	6353	regulation of cellular metabolic process	YIL084C|YML062C|YLR278C|YER051W|YCL039W|YER020W|YNL021W|YAL019W|YIL050W|YPL070W|YPL240C|YGL127C|YNL236W|YGR274C|YFL007W|YDR181C|YDL013W|YLR291C|YAL011W|YOR025W|YGR002C|YJL157C|YBR198C|YNL054W|YDL179W|YBR020W|YML091C|YBR231C|YJL110C|YGL130W|YML043C|YDR096W
6623	0.0012225	0.028223	13	90	351	6353	protein targeting to vacuole	YGL104C|YGL095C|YMR258C|YNL093W|YOR089C|YGR261C|YOL082W|YCL008C|YFR021W|YGL180W|YEL013W|YHL002W|YLL040C
22406	0.0012327	0.028223	6	23	351	6353	membrane docking	YGL095C|YLR166C|YEL013W|YJL085W|YLR148W|YDR189W
44257	0.0012802	0.028223	23	211	351	6353	cellular protein catabolic process	YBL084C|YGL141W|YMR276W|YLR127C|YCL039W|YIL030C|YDL097C|YHR204W|YOR157C|YIL017C|YLR421C|YKR098C|YBR173C|YAL023C|YOL082W|YDR181C|YMR304W|YKL002W|YCL008C|YMR161W|YPR024W|YDR118W|YKL103C
45324	0.0012978	0.028223	8	40	351	6353	late endosome to vacuole transport	YOR089C|YKL002W|YCL008C|YFR021W|YHL002W|YLR148W|YPL070W|YLL040C
51050	0.0013169	0.028223	5	16	351	6353	positive regulation of transport	YGL095C|YLR342W|YPR115W|YLR229C|YDR189W
30866	0.0013169	0.028223	5	16	351	6353	cortical actin cytoskeleton organization	YCR088W|YBR108W|YIR006C|YIL095W|YNL020C
30865	0.0013169	0.028223	5	16	351	6353	cortical cytoskeleton organization	YCR088W|YBR108W|YIR006C|YIL095W|YNL020C
19222	0.0013332	0.028223	79	1041	351	6353	regulation of metabolic process	YIL084C|YML062C|YLR278C|YER051W|YCL039W|YER020W|YNL021W|YAL019W|YDL065C|YIL050W|YPL070W|YPL240C|YGL127C|YNL236W|YGR274C|YFL007W|YDR181C|YDL013W|YLR291C|YAL011W|YOR025W|YGR002C|YJL157C|YBR198C|YNL054W|YDL179W|YBR020W|YML091C|YBR231C|YJL110C|YGL130W|YML043C
10324	0.0014609	0.030039	17	138	351	6353	membrane invagination	YHR016C|YGR086C|YIR006C|YDR129C|YGL045W|YGL206C|YMR258C|YNL093W|YOR109W|YAL030W|YOR089C|YER166W|YDR388W|YFR021W|YGL180W|YEL013W|YAL026C
31338	0.0014741	0.030039	4	10	351	6353	regulation of vesicle fusion	YGL095C|YIL068C|YLR148W|YDR189W
31326	0.0014743	0.030039	67	855	351	6353	regulation of cellular biosynthetic process	YML062C|YIL084C|YLR278C|YER051W|YCL039W|YER020W|YNL021W|YAL019W|YIL050W|YPL240C|YGL127C|YNL236W|YGR274C|YDR181C|YDL013W|YLR291C|YAL011W|YOR025W|YGR002C|YBR198C|YNL054W|YDL179W|YBR020W|YML091C|YBR231C|YJL110C|YGL130W|YML043C|YDR096W|YDR359C|YPL042C|YAL016W
9889	0.0015202	0.03058	67	856	351	6353	regulation of biosynthetic process	YML062C|YIL084C|YLR278C|YER051W|YCL039W|YER020W|YNL021W|YAL019W|YIL050W|YPL240C|YGL127C|YNL236W|YGR274C|YDR181C|YDL013W|YLR291C|YAL011W|YOR025W|YGR002C|YBR198C|YNL054W|YDL179W|YBR020W|YML091C|YBR231C|YJL110C|YGL130W|YML043C|YDR096W|YDR359C|YPL042C|YAL016W
1676	0.0015384	0.03058	3	5	351	6353	long-chain fatty acid metabolic process	YER015W|YMR246W|YNR016C
51603	0.0016422	0.03225	22	202	351	6353	proteolysis involved in cellular protein catabolic process	YBL084C|YGL141W|YMR276W|YLR127C|YCL039W|YIL030C|YDL097C|YHR204W|YOR157C|YIL017C|YLR421C|YKR098C|YBR173C|YAL023C|YOL082W|YDR181C|YMR304W|YKL002W|YCL008C|YMR161W|YPR024W|YDR118W
51129	0.0016798	0.032597	10	61	351	6353	negative regulation of cellular component organization	YAL016W|YLR429W|YIL159W|YNL271C|YPR154W|YJL030W|YDL088C|YGR188C|YIL068C|YJR017C
6511	0.0017333	0.033238	21	190	351	6353	ubiquitin-dependent protein catabolic process	YBL084C|YGL141W|YMR276W|YLR127C|YCL039W|YIL030C|YDL097C|YOR157C|YHR204W|YIL017C|YLR421C|YKR098C|YBR173C|YAL023C|YOL082W|YDR181C|YMR304W|YKL002W|YCL008C|YMR161W|YDR118W
19941	0.0018509	0.035081	21	191	351	6353	modification-dependent protein catabolic process	YBL084C|YGL141W|YMR276W|YLR127C|YCL039W|YIL030C|YDL097C|YOR157C|YHR204W|YIL017C|YLR421C|YKR098C|YBR173C|YAL023C|YOL082W|YDR181C|YMR304W|YKL002W|YCL008C|YMR161W|YDR118W
7015	0.0019239	0.036046	9	52	351	6353	actin filament organization	YPL242C|YHR016C|YLR429W|YIL159W|YNL271C|YDR129C|YOR239W|YIL095W|YNL020C
48518	0.0020219	0.037044	34	369	351	6353	positive regulation of biological process	YIL036W|YIL084C|YPL116W|YER022W|YGL150C|YGL095C|YCL055W|YNL021W|YBR135W|YPL240C|YKR055W|YNL236W|YHR058C|YLR342W|YPR115W|YLR229C|YEL019C|YOR162C|YPL015C|YNL054W|YBR020W|YML091C|YIL131C|YDL203C|YGL130W|YDR096W|YDR189W|YIL017C|YPL042C|YLR240W|YGL209W|YDR227W
51329	0.0020227	0.037044	13	95	351	6353	interphase of mitotic cell cycle	YDL179W|YPL116W|YIL131C|YCL055W|YGL173C|YNL309W|YFL029C|YDR364C|YJL098W|YBR279W|YJL187C|YJR017C|YDR451C
80090	0.002071	0.037509	74	977	351	6353	regulation of primary metabolic process	YML062C|YIL084C|YLR278C|YER051W|YCL039W|YER020W|YNL021W|YAL019W|YIL050W|YPL240C|YPL070W|YGL127C|YNL236W|YGR274C|YFL007W|YDR181C|YDL013W|YLR291C|YAL011W|YOR025W|YGR002C|YBR198C|YNL054W|YDL179W|YBR020W|YML091C|YBR231C|YJL110C|YGL130W|YML043C|YDR096W|YDR359C
51651	0.0021171	0.037922	8	43	351	6353	maintenance of location in cell	YKL002W|YCL027W|YGL200C|YJL110C|YGR188C|YLR369W|YJL157C|YLL040C
6355	0.0022	0.038188	55	682	351	6353	regulation of transcription, DNA-dependent	YML062C|YIL084C|YLR278C|YER051W|YAL019W|YNL021W|YGL127C|YGR274C|YNL236W|YDR181C|YDL013W|YAL011W|YOR025W|YGR002C|YBR198C|YDL179W|YBR020W|YML091C|YBR231C|YJL110C|YGL130W|YML043C|YDR096W|YDR359C|YPL042C|YLR240W|YGL209W|YDR451C|YIL036W|YMR075W|YPL116W|YER022W
30100	0.0022163	0.038188	4	11	351	6353	regulation of endocytosis	YBR059C|YLR342W|YIL095W|YNL020C
51017	0.0022163	0.038188	4	11	351	6353	actin filament bundle assembly	YHR016C|YIL159W|YNL271C|YOR239W
51325	0.0022257	0.038188	13	96	351	6353	interphase	YDL179W|YPL116W|YIL131C|YCL055W|YGL173C|YNL309W|YFL029C|YDR364C|YJL098W|YBR279W|YJL187C|YJR017C|YDR451C
10468	0.0023156	0.039317	64	823	351	6353	regulation of gene expression	YML062C|YIL084C|YLR278C|YER051W|YAL019W|YNL021W|YDL065C|YIL050W|YGL127C|YNL236W|YGR274C|YDR181C|YDL013W|YLR291C|YAL011W|YOR025W|YGR002C|YBR198C|YDL179W|YBR020W|YML091C|YBR231C|YJL110C|YGL130W|YML043C|YDR096W|YDR359C|YPL042C|YAL016W|YLR240W|YGL209W|YDR451C
279	0.0024658	0.041436	31	331	351	6353	M phase	YBL084C|YBR057C|YCL055W|YGL045W|YMR032W|YMR224C|YLR127C|YLR394W|YDR004W|YDL064W|YGL127C|YBL034C|YGR188C|YGR002C|YKR054C|YIL026C|YDR118W|YCR010C|YGL250W|YJR053W|YDR180W|YPL008W|YNL307C|YKR088C|YPL042C|YFL029C|YJL030W|YGL075C|YDL088C|YJL187C|YKR029C
48522	0.0026707	0.044159	33	361	351	6353	positive regulation of cellular process	YIL036W|YIL084C|YPL116W|YER022W|YGL150C|YGL095C|YCL055W|YNL021W|YBR135W|YPL240C|YKR055W|YNL236W|YHR058C|YLR342W|YLR229C|YEL019C|YOR162C|YPL015C|YNL054W|YBR020W|YML091C|YIL131C|YDL203C|YGL130W|YDR096W|YDR189W|YIL017C|YPL042C|YLR240W|YGL209W|YDR227W|YBR279W
7346	0.0026821	0.044159	13	98	351	6353	regulation of mitotic cell cycle	YAL016W|YGR229C|YGL173C|YJR053W|YHR061C|YOR233W|YJL030W|YDL088C|YLR229C|YGR188C|YEL019C|YJL187C|YBR135W
45449	0.0028504	0.046099	55	690	351	6353	regulation of transcription	YML062C|YIL084C|YLR278C|YER051W|YAL019W|YNL021W|YGL127C|YGR274C|YNL236W|YDR181C|YDL013W|YAL011W|YOR025W|YGR002C|YBR198C|YDL179W|YBR020W|YML091C|YBR231C|YJL110C|YGL130W|YML043C|YDR096W|YDR359C|YPL042C|YLR240W|YGL209W|YDR451C|YIL036W|YMR075W|YPL116W|YER022W
43632	0.0028564	0.046099	22	211	351	6353	modification-dependent macromolecule catabolic process	YBL084C|YDL111C|YGL141W|YMR276W|YLR127C|YCL039W|YIL030C|YDL097C|YOR157C|YHR204W|YIL017C|YLR421C|YKR098C|YBR173C|YAL023C|YOL082W|YDR181C|YMR304W|YKL002W|YCL008C|YMR161W|YDR118W
60255	0.0029334	0.046557	69	910	351	6353	regulation of macromolecule metabolic process	YML062C|YIL084C|YLR278C|YER051W|YNL021W|YAL019W|YDL065C|YIL050W|YPL240C|YGL127C|YNL236W|YGR274C|YFL007W|YDR181C|YDL013W|YLR291C|YAL011W|YOR025W|YGR002C|YBR198C|YDL179W|YBR020W|YML091C|YBR231C|YJL110C|YGL130W|YML043C|YDR096W|YPL008W|YDR359C|YPL042C|YAL016W
19388	0.002951	0.046557	3	6	351	6353	galactose catabolic process	YBR020W|YBR018C|YBR019C
70649	0.0030443	0.046557	2	2	351	6353	formin-nucleated actin cable assembly	YIL159W|YNL271C
35543	0.0030443	0.046557	2	2	351	6353	positive regulation of SNARE complex assembly	YGL095C|YDR189W
33215	0.0030443	0.046557	2	2	351	6353	iron assimilation by reduction and transport	YER145C|YMR058W
31503	0.0030562	0.046557	5	19	351	6353	protein complex localization	YOL082W|YOL083W|YJL085W|YIL068C|YER107C
6537	0.003181	0.047816	4	12	351	6353	glutamate biosynthetic process	YAL062W|YOR375C|YNL037C|YDL171C
10556	0.0031975	0.047816	64	834	351	6353	regulation of macromolecule biosynthetic process	YML062C|YIL084C|YLR278C|YER051W|YNL021W|YAL019W|YIL050W|YPL240C|YGL127C|YNL236W|YGR274C|YDR181C|YDL013W|YLR291C|YAL011W|YOR025W|YGR002C|YBR198C|YDL179W|YBR020W|YML091C|YBR231C|YJL110C|YGL130W|YML043C|YDR096W|YDR359C|YPL042C|YAL016W|YLR240W|YGL209W|YDR451C
43254	0.0032971	0.048857	8	46	351	6353	regulation of protein complex assembly	YGL208W|YIL159W|YNL271C|YGL095C|YIL068C|YJR017C|YLR148W|YDR189W
32879	0.0038286	0.056181	11	79	351	6353	regulation of localization	YBR059C|YGL095C|YLR342W|YPR115W|YLR229C|YIL095W|YOL001W|YIL068C|YNL020C|YLR148W|YDR189W
51726	0.0038793	0.056181	21	203	351	6353	regulation of cell cycle	YPL153C|YDL179W|YGR229C|YJR053W|YOR233W|YBL088C|YOL001W|YBR135W|YIL050W|YAL016W|YGL173C|YHR061C|YJL030W|YDL088C|YGR188C|YLR229C|YBL056W|YJL157C|YEL019C|YJL187C|YKR029C
51252	0.0038947	0.056181	55	700	351	6353	regulation of RNA metabolic process	YML062C|YIL084C|YLR278C|YER051W|YAL019W|YNL021W|YGL127C|YGR274C|YNL236W|YDR181C|YDL013W|YAL011W|YOR025W|YGR002C|YBR198C|YDL179W|YBR020W|YML091C|YBR231C|YJL110C|YGL130W|YML043C|YDR096W|YDR359C|YPL042C|YLR240W|YGL209W|YDR451C|YIL036W|YMR075W|YPL116W|YER022W
70585	0.0041597	0.058451	9	58	351	6353	protein localization in mitochondrion	YER017C|YNR017W|YJR135W-A|YNL131W|YGR181W|YMR203W|YIL022W|YJL054W|YPL240C
48284	0.0041597	0.058451	9	58	351	6353	organelle fusion	YGL173C|YAL030W|YGL095C|YCL055W|YDR356W|YOR211C|YKR054C|YDR189W|YMR183C
6626	0.0041597	0.058451	9	58	351	6353	protein targeting to mitochondrion	YER017C|YNR017W|YJR135W-A|YNL131W|YGR181W|YMR203W|YIL022W|YJL054W|YPL240C
51235	0.0043311	0.059723	8	48	351	6353	maintenance of location	YKL002W|YCL027W|YGL200C|YJL110C|YGR188C|YLR369W|YJL157C|YLL040C
114	0.0043968	0.059723	4	13	351	6353	regulation of transcription involved in G1 phase of mitotic cell cycle	YIL131C|YBR279W|YJR017C|YDR451C
6904	0.0043968	0.059723	4	13	351	6353	vesicle docking involved in exocytosis	YGL095C|YJL085W|YLR148W|YDR189W
7266	0.0043968	0.059723	4	13	351	6353	Rho protein signal transduction	YHR061C|YNL180C|YLR229C|YJL085W
51649	0.0045313	0.061041	55	705	351	6353	establishment of localization in cell	YML062C|YPR079W|YGL104C|YLR096W|YGL095C|YOR036W|YKL079W|YMR203W|YDL065C|YPL240C|YPL070W|YNR017W|YAL030W|YOR089C|YKL002W|YGL200C|YAL026C|YKR054C|YHL002W|YER017C|YNL271C|YIL068C|YDR189W|YGR261C|YOL082W|YAL023C|YER166W|YLR166C|YNL131W|YLR148W|YLL040C|YMR183C
6605	0.0047772	0.063587	26	275	351	6353	protein targeting	YGL104C|YGL095C|YJL004C|YMR203W|YNL093W|YDL065C|YJL054W|YPL240C|YNR017W|YOR089C|YCL008C|YFR021W|YGL180W|YHL002W|YNR016C|YER017C|YIL149C|YGR181W|YMR258C|YJR135W-A|YGR261C|YOL082W|YNL131W|YEL013W|YIL022W|YLL040C
51234	0.0047983	0.063587	88	1237	351	6353	establishment of localization	YML062C|YPR079W|YIR006C|YGL104C|YLR096W|YGL095C|YOR036W|YKL079W|YMR203W|YDL065C|YPL240C|YPL070W|YNR017W|YAL030W|YOR089C|YKL002W|YGL200C|YKL209C|YAL026C|YKR054C|YHL002W|YER017C|YNL271C|YDR342C|YIL068C|YMR088C|YLR193C|YDR189W|YLR240W|YDR135C|YGR261C|YAL023C
45935	0.0052406	0.068889	25	263	351	6353	positive regulation of nucleobase, nucleoside, nucleotide and nucleic acid metabolic process	YIL036W|YIL084C|YPL116W|YER022W|YCL055W|YGL150C|YNL021W|YBR135W|YPL240C|YNL236W|YHR058C|YOR162C|YPL015C|YBR020W|YML091C|YIL131C|YGL130W|YDR096W|YIL017C|YPL042C|YLR240W|YGL209W|YDR227W|YBR279W|YJR017C
7017	0.0053344	0.069561	13	106	351	6353	microtubule-based process	YNL271C|YJR108W|YIL149C|YMR276W|YKL079W|YKR088C|YDL064W|YLR429W|YBL034C|YDR356W|YGL075C|YGR188C|YKR054C
51173	0.0055013	0.070554	25	264	351	6353	positive regulation of nitrogen compound metabolic process	YIL036W|YIL084C|YPL116W|YER022W|YCL055W|YGL150C|YNL021W|YBR135W|YPL240C|YNL236W|YHR058C|YOR162C|YPL015C|YBR020W|YML091C|YIL131C|YGL130W|YDR096W|YIL017C|YPL042C|YLR240W|YGL209W|YDR227W|YBR279W|YJR017C
19219	0.0055114	0.070554	61	806	351	6353	regulation of nucleobase, nucleoside, nucleotide and nucleic acid metabolic process	YML062C|YIL084C|YLR278C|YER051W|YER020W|YAL019W|YNL021W|YPL240C|YPL070W|YGL127C|YNL236W|YGR274C|YDR181C|YDL013W|YAL011W|YOR025W|YGR002C|YBR198C|YDL179W|YBR020W|YML091C|YBR231C|YJL110C|YGL130W|YML043C|YDR096W|YPL008W|YDR359C|YPL042C|YLR240W|YGL209W|YDR451C
16481	0.0055837	0.070554	22	223	351	6353	negative regulation of transcription	YIL084C|YMR075W|YIL131C|YGL150C|YCL055W|YJL110C|YDR096W|YOL001W|YNL021W|YAL019W|YPL042C|YNL236W|YBL052C|YGL209W|YDR227W|YDR181C|YOR025W|YAR003W|YBR279W|YJR017C|YDR451C|YPL015C
45892	0.0055837	0.070554	22	223	351	6353	negative regulation of transcription, DNA-dependent	YIL084C|YMR075W|YIL131C|YGL150C|YCL055W|YJL110C|YDR096W|YOL001W|YNL021W|YAL019W|YPL042C|YNL236W|YBL052C|YGL209W|YDR227W|YDR181C|YOR025W|YAR003W|YBR279W|YJR017C|YDR451C|YPL015C
32507	0.005676	0.071169	7	40	351	6353	maintenance of protein location in cell	YKL002W|YCL027W|YGL200C|YJL110C|YGR188C|YJL157C|YLL040C
16050	0.0058572	0.072675	9	61	351	6353	vesicle organization	YAL030W|YOL082W|YKL002W|YGL095C|YGL200C|YEL013W|YJL004C|YDR189W|YMR183C
51253	0.0058854	0.072675	22	224	351	6353	negative regulation of RNA metabolic process	YIL084C|YMR075W|YIL131C|YGL150C|YCL055W|YJL110C|YDR096W|YOL001W|YNL021W|YAL019W|YPL042C|YNL236W|YBL052C|YGL209W|YDR227W|YDR181C|YOR025W|YAR003W|YBR279W|YJR017C|YDR451C|YPL015C
51171	0.0059824	0.072897	61	809	351	6353	regulation of nitrogen compound metabolic process	YML062C|YIL084C|YLR278C|YER051W|YER020W|YAL019W|YNL021W|YPL240C|YPL070W|YGL127C|YNL236W|YGR274C|YDR181C|YDL013W|YAL011W|YOR025W|YGR002C|YBR198C|YDL179W|YBR020W|YML091C|YBR231C|YJL110C|YGL130W|YML043C|YDR096W|YPL008W|YDR359C|YPL042C|YLR240W|YGL209W|YDR451C
51301	0.006018	0.072897	27	294	351	6353	cell division	YPL242C|YBL084C|YDR129C|YIR006C|YMR032W|YLR127C|YIL050W|YBR135W|YDL064W|YHR061C|YBL034C|YDL164C|YLR229C|YER118C|YBL085W|YJL157C|YIL095W|YDR118W|YIL026C|YNL020C|YDL179W|YJR053W|YNL271C|YDR364C|YJL030W|YDL088C|YJL187C
48278	0.0060375	0.072897	5	22	351	6353	vesicle docking	YGL095C|YLR166C|YJL085W|YLR148W|YDR189W
16197	0.0061531	0.073178	11	84	351	6353	endosome transport	YOR089C|YKL002W|YGL095C|YCL008C|YFR021W|YJL004C|YHL002W|YNL093W|YLR148W|YPL070W|YLL040C
6508	0.0061534	0.073178	29	323	351	6353	proteolysis	YDR331W|YBL084C|YGL141W|YMR276W|YCL039W|YLR127C|YPR191W|YDL097C|YLR421C|YHR113W|YDR181C|YKL002W|YCL008C|YPR024W|YDR118W|YKL103C|YER017C|YIL030C|YOR157C|YHR204W|YIL017C|YKR098C|YBR173C|YMR304W|YOL082W|YAL023C|YMR161W|YLR120C|YFR044C
43161	0.0062504	0.073178	13	108	351	6353	proteasomal ubiquitin-dependent protein catabolic process	YBL084C|YIL017C|YGL141W|YAL023C|YOL082W|YMR161W|YMR276W|YLR127C|YCL039W|YDR118W|YIL030C|YHR204W|YOR157C
10498	0.0062504	0.073178	13	108	351	6353	proteasomal protein catabolic process	YBL084C|YIL017C|YGL141W|YAL023C|YOL082W|YMR161W|YMR276W|YLR127C|YCL039W|YDR118W|YIL030C|YHR204W|YOR157C
6352	0.0063289	0.073178	8	51	351	6353	transcription initiation	YGR274C|YNL236W|YHR058C|YER022W|YMR228W|YJL025W|YML043C|YBR198C
22607	0.0063301	0.073178	49	623	351	6353	cellular component assembly	YIR006C|YMR032W|YMR276W|YDR004W|YAL019W|YPL240C|YGR274C|YNL236W|YFL007W|YDL209C|YAL026C|YBR198C|YNL020C|YFL023W|YER017C|YNL271C|YPL211W|YOR239W|YBR195C|YML043C|YDR359C|YGL075C|YLL040C|YMR183C|YHR016C|YGR086C|YER022W|YGL150C|YMR213W|YJL025W|YLR394W|YDL097C
51254	0.0066482	0.076314	24	254	351	6353	positive regulation of RNA metabolic process	YIL036W|YIL084C|YBR020W|YML091C|YPL116W|YIL131C|YER022W|YGL150C|YCL055W|YGL130W|YDR096W|YNL021W|YBR135W|YPL042C|YNL236W|YIL017C|YHR058C|YLR240W|YGL209W|YDR227W|YBR279W|YOR162C|YJR017C|YPL015C
45893	0.006872	0.078332	22	227	351	6353	positive regulation of transcription, DNA-dependent	YIL036W|YIL084C|YBR020W|YML091C|YPL116W|YIL131C|YER022W|YGL150C|YCL055W|YGL130W|YDR096W|YNL021W|YBR135W|YPL042C|YNL236W|YIL017C|YHR058C|YGL209W|YDR227W|YOR162C|YJR017C|YPL015C
45941	0.0072296	0.081271	22	228	351	6353	positive regulation of transcription	YIL036W|YIL084C|YBR020W|YML091C|YPL116W|YIL131C|YER022W|YGL150C|YCL055W|YGL130W|YDR096W|YNL021W|YBR135W|YPL042C|YNL236W|YIL017C|YHR058C|YGL209W|YDR227W|YOR162C|YJR017C|YPL015C
10629	0.0072296	0.081271	22	228	351	6353	negative regulation of gene expression	YIL084C|YMR075W|YIL131C|YGL150C|YCL055W|YJL110C|YDR096W|YOL001W|YNL021W|YAL019W|YPL042C|YNL236W|YBL052C|YGL209W|YDR227W|YDR181C|YOR025W|YAR003W|YBR279W|YJR017C|YDR451C|YPL015C
97	0.0074723	0.083424	7	42	351	6353	sulfur amino acid biosynthetic process	YDR502C|YHR137W|YER091C|YFR055W|YAL012W|YLR303W|YLL058W
10628	0.0076024	0.083745	22	229	351	6353	positive regulation of gene expression	YIL036W|YIL084C|YBR020W|YML091C|YPL116W|YIL131C|YER022W|YGL150C|YCL055W|YGL130W|YDR096W|YNL021W|YBR135W|YPL042C|YNL236W|YIL017C|YHR058C|YGL209W|YDR227W|YOR162C|YJR017C|YPL015C
83	0.0076038	0.083745	3	8	351	6353	regulation of transcription involved in G1/S-phase of mitotic cell cycle	YDL179W|YNL309W|YPL116W
6536	0.0076883	0.084107	4	15	351	6353	glutamate metabolic process	YAL062W|YOR375C|YNL037C|YDL171C
6810	0.007792	0.084673	85	1209	351	6353	transport	YML062C|YPR079W|YIR006C|YGL104C|YLR096W|YGL095C|YOR036W|YKL079W|YMR203W|YDL065C|YPL240C|YPL070W|YNR017W|YAL030W|YOR089C|YKL002W|YGL200C|YKL209C|YAL026C|YKR054C|YHL002W|YER017C|YDR342C|YIL068C|YMR088C|YLR193C|YDR189W|YLR240W|YDR135C|YGR261C|YAL023C|YOL082W
45185	0.0085136	0.091234	7	43	351	6353	maintenance of protein location	YKL002W|YCL027W|YGL200C|YJL110C|YGR188C|YJL157C|YLL040C
33212	0.0087983	0.091234	2	3	351	6353	iron assimilation	YER145C|YMR058W
6311	0.0087983	0.091234	2	3	351	6353	meiotic gene conversion	YGL127C|YGL250W
6390	0.0087983	0.091234	2	3	351	6353	transcription from mitochondrial promoter	YFL036W|YMR228W
6361	0.0087983	0.091234	2	3	351	6353	transcription initiation from RNA polymerase I promoter	YJL025W|YML043C
6827	0.0087983	0.091234	2	3	351	6353	high-affinity iron ion transport	YER145C|YMR058W
31340	0.0087983	0.091234	2	3	351	6353	positive regulation of vesicle fusion	YGL095C|YDR189W
32956	0.0088995	0.091234	5	24	351	6353	regulation of actin cytoskeleton organization	YKR055W|YLR429W|YIL159W|YNL271C|YPR154W
32970	0.0088995	0.091234	5	24	351	6353	regulation of actin filament-based process	YKR055W|YLR429W|YIL159W|YNL271C|YPR154W
35556	0.0094192	0.095958	16	152	351	6353	intracellular signal transduction	YPL242C|YER020W|YJL085W|YNL093W|YKR055W|YLR240W|YLR422W|YNL180C|YHR061C|YOR089C|YJL095W|YLR229C|YBL056W|YMR068W|YLR452C|YOR107W
30433	0.0096578	0.097778	7	44	351	6353	ER-associated protein catabolic process	YGL141W|YAL023C|YOL082W|YMR161W|YMR276W|YIL030C|YHR204W
7569	0.0098172	0.098172	9	66	351	6353	cell aging	YGR231C|YGL208W|YER017C|YDR227W|YKL008C|YER020W|YDR096W|YNL021W|YPL015C
7568	0.0098172	0.098172	9	66	351	6353	aging	YGR231C|YGL208W|YER017C|YDR227W|YKL008C|YER020W|YDR096W|YNL021W|YPL015C
7007	0.010632	0.10567	5	25	351	6353	inner mitochondrial membrane organization	YBR262C|YJR135W-A|YDR393W|YGR181W|YJL054W
7067	0.010765	0.10586	18	181	351	6353	mitosis	YBL084C|YJR053W|YDR180W|YMR032W|YLR127C|YPL008W|YNL307C|YDL064W|YBL034C|YJL030W|YGL075C|YDL088C|YGR188C|YGR002C|YKR054C|YIL026C|YDR118W|YJL187C
9890	0.010892	0.10586	25	279	351	6353	negative regulation of biosynthetic process	YIL084C|YMR075W|YCL055W|YGL150C|YCL039W|YOL001W|YNL021W|YAL019W|YDR206W|YNL236W|YDR181C|YOR025W|YPL015C|YIL131C|YJL110C|YDR096W|YIL017C|YPL042C|YGL209W|YBL052C|YDR227W|YAR003W|YBR279W|YJR017C|YDR451C
31327	0.010892	0.10586	25	279	351	6353	negative regulation of cellular biosynthetic process	YIL084C|YMR075W|YCL055W|YGL150C|YCL039W|YOL001W|YNL021W|YAL019W|YDR206W|YNL236W|YDR181C|YOR025W|YPL015C|YIL131C|YJL110C|YDR096W|YIL017C|YPL042C|YGL209W|YBL052C|YDR227W|YAR003W|YBR279W|YJR017C|YDR451C
1302	0.01091	0.10586	7	45	351	6353	replicative cell aging	YGR231C|YGL208W|YER017C|YDR227W|YKL008C|YER020W|YNL021W
33365	0.01105	0.10657	17	168	351	6353	protein localization in organelle	YER017C|YJL110C|YIL149C|YJL004C|YGR181W|YMR203W|YPL240C|YJL054W|YNR017W|YJR135W-A|YKL002W|YGL200C|YNL131W|YJL157C|YIL022W|YLL040C|YNR016C
226	0.011122	0.10664	11	91	351	6353	microtubule cytoskeleton organization	YKR088C|YDL064W|YNL271C|YJR108W|YBL034C|YDR356W|YMR276W|YIL149C|YGL075C|YGR188C|YKR054C
71174	0.011329	0.10736	6	35	351	6353	mitotic cell cycle spindle checkpoint	YAL016W|YJR053W|YOR233W|YJL030W|YDL088C|YGR188C
6893	0.011329	0.10736	6	35	351	6353	Golgi to plasma membrane transport	YAL030W|YLR166C|YJL085W|YJL004C|YIL068C|YMR183C
31324	0.011417	0.10757	27	309	351	6353	negative regulation of cellular metabolic process	YGR231C|YIL084C|YMR075W|YGL150C|YCL055W|YCL039W|YOL001W|YNL021W|YAL019W|YDR206W|YNL236W|YDR181C|YOR025W|YPL015C|YIL131C|YJL110C|YDR096W|YPL008W|YIL017C|YPL042C|YGL209W|YBL052C|YDR227W|YAR003W|YBR279W|YJR017C|YDR451C
46907	0.011764	0.1102	50	660	351	6353	intracellular transport	YPR079W|YML062C|YGL104C|YGL095C|YOR036W|YMR203W|YDL065C|YPL240C|YPL070W|YNR017W|YAL030W|YOR089C|YKL002W|YGL200C|YAL026C|YKR054C|YHL002W|YER017C|YIL068C|YDR189W|YGR261C|YOL082W|YAL023C|YLR166C|YER166W|YNL131W|YLL040C|YMR183C|YLR148W|YGL206C|YJL004C|YNL093W
16310	0.011859	0.11046	25	281	351	6353	phosphorylation	YLR096W|YOR233W|YBR059C|YBL088C|YJL166W|YPR191W|YGL208W|YGL180W|YGR188C|YJL095W|YIL095W|YNL020C|YDR122W|YPL153C|YBR020W|YNL307C|YOR109W|YFR014C|YPL042C|YLR240W|YFL029C|YKL025C|YJL187C|YFR019W|YBR028C
280	0.011982	0.11097	18	183	351	6353	nuclear division	YBL084C|YJR053W|YDR180W|YMR032W|YLR127C|YPL008W|YNL307C|YDL064W|YBL034C|YJL030W|YGL075C|YDL088C|YGR188C|YGR002C|YKR054C|YIL026C|YDR118W|YJL187C
45934	0.012174	0.11123	23	253	351	6353	negative regulation of nucleobase, nucleoside, nucleotide and nucleic acid metabolic process	YIL084C|YMR075W|YIL131C|YGL150C|YCL055W|YJL110C|YDR096W|YOL001W|YPL008W|YNL021W|YAL019W|YPL042C|YNL236W|YBL052C|YGL209W|YDR227W|YDR181C|YOR025W|YAR003W|YBR279W|YJR017C|YDR451C|YPL015C
51172	0.012174	0.11123	23	253	351	6353	negative regulation of nitrogen compound metabolic process	YIL084C|YMR075W|YIL131C|YGL150C|YCL055W|YJL110C|YDR096W|YOL001W|YPL008W|YNL021W|YAL019W|YPL042C|YNL236W|YBL052C|YGL209W|YDR227W|YDR181C|YOR025W|YAR003W|YBR279W|YJR017C|YDR451C|YPL015C
7006	0.012277	0.11123	7	46	351	6353	mitochondrial membrane organization	YBR262C|YJR135W-A|YNL131W|YOR266W|YDR393W|YGR181W|YJL054W
51494	0.012283	0.11123	4	17	351	6353	negative regulation of cytoskeleton organization	YLR429W|YIL159W|YNL271C|YPR154W
46700	0.012866	0.11553	13	118	351	6353	heterocycle catabolic process	YOR076C|YER036C|YLR044C|YER020W|YDR135C|YLR249W|YKL188C|YKL209C|YLR209C|YIR029W|YOR211C|YDL238C|YKR054C
34641	0.012935	0.11553	132	2034	351	6353	cellular nitrogen compound metabolic process	YML062C|YER091C|YFL036W|YIL084C|YLR278C|YLR044C|YBL088C|YER051W|YDR037W|YDR004W|YNL236W|YGR103W|YDR181C|YMR108W|YER081W|YOR025W|YIR029W|YPL104W|YGR002C|YDL209C|YKR054C|YKL216W|YBR061C|YML091C|YGL250W|YBR231C|YML043C|YDR096W|YPL008W|YNL307C|YDR359C|YPL042C
43044	0.01298	0.11553	6	36	351	6353	ATP-dependent chromatin remodeling	YBR231C|YGL150C|YAL011W|YGR002C|YDR485C|YAL019W
9891	0.013112	0.11553	24	269	351	6353	positive regulation of biosynthetic process	YIL036W|YIL084C|YNL054W|YBR020W|YML091C|YPL116W|YIL131C|YER022W|YGL150C|YCL055W|YGL130W|YDR096W|YNL021W|YBR135W|YPL240C|YPL042C|YNL236W|YIL017C|YHR058C|YGL209W|YDR227W|YOR162C|YJR017C|YPL015C
31328	0.013112	0.11553	24	269	351	6353	positive regulation of cellular biosynthetic process	YIL036W|YIL084C|YNL054W|YBR020W|YML091C|YPL116W|YIL131C|YER022W|YGL150C|YCL055W|YGL130W|YDR096W|YNL021W|YBR135W|YPL240C|YPL042C|YNL236W|YIL017C|YHR058C|YGL209W|YDR227W|YOR162C|YJR017C|YPL015C
43549	0.013636	0.1195	8	58	351	6353	regulation of kinase activity	YDL179W|YNL054W|YGR086C|YBL056W|YJL157C|YOL001W|YJL187C|YIL050W
9892	0.013915	0.11964	27	314	351	6353	negative regulation of metabolic process	YGR231C|YIL084C|YMR075W|YGL150C|YCL055W|YCL039W|YOL001W|YNL021W|YAL019W|YDR206W|YNL236W|YDR181C|YOR025W|YPL015C|YIL131C|YJL110C|YDR096W|YPL008W|YIL017C|YPL042C|YGL209W|YBL052C|YDR227W|YAR003W|YBR279W|YJR017C|YDR451C
44270	0.014484	0.11964	12	107	351	6353	cellular nitrogen compound catabolic process	YOR076C|YER036C|YDR135C|YLR249W|YKL188C|YLR209C|YKL209C|YIR029W|YOR211C|YER020W|YDL238C|YKR054C
6350	0.014578	0.11964	43	558	351	6353	transcription	YIL036W|YIL084C|YML062C|YFL036W|YMR075W|YLR278C|YPL116W|YER022W|YGL150C|YER051W|YJL025W|YNL021W|YBR135W|YGL127C|YNL236W|YGR274C|YHR058C|YDR181C|YDL013W|YAL011W|YOR025W|YGR002C|YOR064C|YOR162C|YBR198C|YPL015C|YGR229C|YNL251C|YIL131C|YBR231C|YMR228W|YJL110C
6351	0.014578	0.11964	43	558	351	6353	transcription, DNA-dependent	YIL036W|YIL084C|YML062C|YFL036W|YMR075W|YLR278C|YPL116W|YER022W|YGL150C|YER051W|YJL025W|YNL021W|YBR135W|YGL127C|YNL236W|YGR274C|YHR058C|YDR181C|YDL013W|YAL011W|YOR025W|YGR002C|YOR064C|YOR162C|YBR198C|YPL015C|YGR229C|YNL251C|YIL131C|YBR231C|YMR228W|YJL110C
87	0.014743	0.11964	18	187	351	6353	M phase of mitotic cell cycle	YBL084C|YJR053W|YDR180W|YMR032W|YLR127C|YPL008W|YNL307C|YDL064W|YBL034C|YJL030W|YGL075C|YDL088C|YGR188C|YGR002C|YKR054C|YIL026C|YDR118W|YJL187C
79	0.01476	0.11964	5	27	351	6353	regulation of cyclin-dependent protein kinase activity	YDL179W|YBL056W|YOL001W|YJL187C|YIL050W
22	0.015002	0.11964	3	10	351	6353	mitotic spindle elongation	YKR088C|YDL064W|YKR054C
51231	0.015002	0.11964	3	10	351	6353	spindle elongation	YKR088C|YDL064W|YKR054C
31333	0.015002	0.11964	3	10	351	6353	negative regulation of protein complex assembly	YIL159W|YNL271C|YIL068C
6997	0.015041	0.11964	8	59	351	6353	nucleus organization	YGL173C|YIL016W|YCL055W|YDR356W|YDL088C|YKR054C|YER107C|YNR016C
11	0.015119	0.11964	4	18	351	6353	vacuole inheritance	YOR089C|YGL095C|YOR036W|YEL013W
22604	0.015119	0.11964	4	18	351	6353	regulation of cell morphogenesis	YHR061C|YLR342W|YCL027W|YLR229C
10605	0.01518	0.11964	25	287	351	6353	negative regulation of macromolecule metabolic process	YGR231C|YIL084C|YMR075W|YCL055W|YGL150C|YOL001W|YNL021W|YAL019W|YDR206W|YNL236W|YDR181C|YOR025W|YPL015C|YIL131C|YJL110C|YDR096W|YPL008W|YPL042C|YGL209W|YBL052C|YDR227W|YAR003W|YBR279W|YJR017C|YDR451C
96	0.015373	0.11964	7	48	351	6353	sulfur amino acid metabolic process	YDR502C|YHR137W|YER091C|YFR055W|YAL012W|YLR303W|YLL058W
7093	0.015373	0.11964	7	48	351	6353	mitotic cell cycle checkpoint	YAL016W|YJR053W|YOR233W|YJL030W|YDL088C|YGR188C|YJL187C
32774	0.015884	0.11964	43	561	351	6353	RNA biosynthetic process	YIL036W|YIL084C|YML062C|YFL036W|YMR075W|YLR278C|YPL116W|YER022W|YGL150C|YER051W|YJL025W|YNL021W|YBR135W|YGL127C|YNL236W|YGR274C|YHR058C|YDR181C|YDL013W|YAL011W|YOR025W|YGR002C|YOR064C|YOR162C|YBR198C|YPL015C|YGR229C|YNL251C|YIL131C|YBR231C|YMR228W|YJL110C
45944	0.016298	0.11964	18	189	351	6353	positive regulation of transcription from RNA polymerase II promoter	YIL036W|YIL084C|YML091C|YPL116W|YIL131C|YER022W|YGL150C|YCL055W|YGL130W|YDR096W|YNL021W|YNL236W|YIL017C|YPL042C|YHR058C|YGL209W|YOR162C|YJR017C
51338	0.016549	0.11964	8	60	351	6353	regulation of transferase activity	YDL179W|YNL054W|YGR086C|YBL056W|YJL157C|YOL001W|YJL187C|YIL050W
60968	0.016775	0.11964	6	38	351	6353	regulation of gene silencing	YIL084C|YDR227W|YIL131C|YBR279W|YNL021W|YPL015C
31935	0.016775	0.11964	6	38	351	6353	regulation of chromatin silencing	YIL084C|YDR227W|YIL131C|YBR279W|YNL021W|YPL015C
31577	0.016775	0.11964	6	38	351	6353	spindle checkpoint	YAL016W|YJR053W|YOR233W|YJL030W|YDL088C|YGR188C
65008	0.016798	0.11964	34	424	351	6353	regulation of biological quality	YBL088C|YGL095C|YCL027W|YDR065W|YER020W|YOL001W|YDR004W|YDL065C|YIL050W|YHR026W|YHR061C|YKL002W|YDL013W|YLR342W|YGL200C|YLR229C|YGR188C|YLR369W|YJL157C|YDR518W|YMR058W|YNL271C|YJL110C|YDR534C|YDR096W|YCL043C|YPL042C|YIL159W|YBR127C|YCR061W|YER145C|YAR003W
8214	0.016955	0.11964	2	4	351	6353	protein amino acid dealkylation	YER051W|YDR096W
51457	0.016955	0.11964	2	4	351	6353	maintenance of protein location in nucleus	YJL110C|YJL157C
16577	0.016955	0.11964	2	4	351	6353	histone demethylation	YER051W|YDR096W
51607	0.016955	0.11964	2	4	351	6353	defense response to virus	YGR271W|YPR189W
51601	0.016955	0.11964	2	4	351	6353	exocyst localization	YJL085W|YIL068C
51693	0.016955	0.11964	2	4	351	6353	actin filament capping	YIL159W|YNL271C
51707	0.016955	0.11964	2	4	351	6353	response to other organism	YGR271W|YPR189W
70988	0.016955	0.11964	2	4	351	6353	demethylation	YER051W|YDR096W
9615	0.016955	0.11964	2	4	351	6353	response to virus	YGR271W|YPR189W
32527	0.016955	0.11964	2	4	351	6353	protein exit from endoplasmic reticulum	YAL023C|YDL065C
2252	0.016955	0.11964	2	4	351	6353	immune effector process	YGR271W|YPR189W
6482	0.016955	0.11964	2	4	351	6353	protein amino acid demethylation	YER051W|YDR096W
2376	0.016955	0.11964	2	4	351	6353	immune system process	YGR271W|YPR189W
51125	0.016955	0.11964	2	4	351	6353	regulation of actin nucleation	YLR429W|YPR154W
51126	0.016955	0.11964	2	4	351	6353	negative regulation of actin nucleation	YLR429W|YPR154W
6955	0.016955	0.11964	2	4	351	6353	immune response	YGR271W|YPR189W
51016	0.016955	0.11964	2	4	351	6353	barbed-end actin filament capping	YIL159W|YNL271C
34755	0.016955	0.11964	2	4	351	6353	iron ion transmembrane transport	YER145C|YMR058W
15693	0.016955	0.11964	2	4	351	6353	magnesium ion transport	YFL050C|YOL130W
30834	0.016955	0.11964	2	4	351	6353	regulation of actin filament depolymerization	YIL159W|YNL271C
30835	0.016955	0.11964	2	4	351	6353	negative regulation of actin filament depolymerization	YIL159W|YNL271C
34316	0.016955	0.11964	2	4	351	6353	negative regulation of Arp2/3 complex-mediated actin nucleation	YLR429W|YPR154W
34315	0.016955	0.11964	2	4	351	6353	regulation of Arp2/3 complex-mediated actin nucleation	YLR429W|YPR154W
6807	0.017053	0.11981	133	2068	351	6353	nitrogen compound metabolic process	YML062C|YER091C|YFL036W|YIL084C|YLR278C|YLR044C|YBL088C|YER051W|YDR037W|YDR004W|YNL236W|YGR103W|YDR181C|YMR108W|YER081W|YOR025W|YIR029W|YPL104W|YGR002C|YDL209C|YKR054C|YKL216W|YBR061C|YML091C|YGL250W|YBR231C|YML043C|YDR096W|YPL008W|YNL307C|YDR359C|YPL042C
34656	0.017434	0.12144	11	97	351	6353	nucleobase, nucleoside and nucleotide catabolic process	YOR076C|YER036C|YDR135C|YLR249W|YKL188C|YLR209C|YKL209C|YOR211C|YER020W|YDL238C|YKR054C
34655	0.017434	0.12144	11	97	351	6353	nucleobase, nucleoside, nucleotide and nucleic acid catabolic process	YOR076C|YER036C|YDR135C|YLR249W|YKL188C|YLR209C|YKL209C|YOR211C|YER020W|YDL238C|YKR054C
10558	0.017879	0.12401	23	262	351	6353	negative regulation of macromolecule biosynthetic process	YIL084C|YMR075W|YIL131C|YGL150C|YCL055W|YJL110C|YDR096W|YOL001W|YNL021W|YAL019W|YDR206W|YPL042C|YNL236W|YBL052C|YGL209W|YDR227W|YDR181C|YOR025W|YAR003W|YBR279W|YJR017C|YDR451C|YPL015C
51174	0.018074	0.12431	10	85	351	6353	regulation of phosphorus metabolic process	YDL179W|YNL054W|YGR086C|YML072C|YBL056W|YJL157C|YOL001W|YJL187C|YIL050W|YJR017C
19220	0.018074	0.12431	10	85	351	6353	regulation of phosphate metabolic process	YDL179W|YNL054W|YGR086C|YML072C|YBL056W|YJL157C|YOL001W|YJL187C|YIL050W|YJR017C
43933	0.01842	0.12616	41	535	351	6353	macromolecular complex subunit organization	YGR086C|YIL016W|YER022W|YGL150C|YMR213W|YJL025W|YDR485C|YDR004W|YDL097C|YPL240C|YNL236W|YGR274C|YHR058C|YFL007W|YAL011W|YGR188C|YGR002C|YOL083W|YAL026C|YDL209C|YBR198C|YFL023W|YER017C|YAL032C|YNL251C|YIL131C|YBR231C|YPL211W|YMR228W|YBR195C|YML043C|YML049C
10557	0.018624	0.12701	23	263	351	6353	positive regulation of macromolecule biosynthetic process	YIL036W|YIL084C|YBR020W|YML091C|YPL116W|YIL131C|YER022W|YGL150C|YCL055W|YGL130W|YDR096W|YNL021W|YBR135W|YPL240C|YPL042C|YNL236W|YIL017C|YHR058C|YGL209W|YDR227W|YOR162C|YJR017C|YPL015C
23033	0.018701	0.12701	20	220	351	6353	signaling pathway	YPL242C|YPL153C|YBL088C|YER020W|YJL085W|YNL093W|YKR055W|YLR422W|YLR240W|YHR061C|YNL180C|YOR089C|YJL095W|YLR229C|YBL056W|YMR068W|YER118C|YLR452C|YJL157C|YOR107W
23034	0.018868	0.12761	18	192	351	6353	intracellular signaling pathway	YPL242C|YPL153C|YBL088C|YER020W|YJL085W|YNL093W|YKR055W|YLR422W|YLR240W|YNL180C|YHR061C|YOR089C|YJL095W|YLR229C|YBL056W|YMR068W|YLR452C|YOR107W
48285	0.019791	0.13225	18	193	351	6353	organelle fission	YBL084C|YJR053W|YDR180W|YMR032W|YLR127C|YPL008W|YNL307C|YDL064W|YBL034C|YJL030W|YGL075C|YDL088C|YGR188C|YGR002C|YKR054C|YIL026C|YDR118W|YJL187C
45039	0.019796	0.13225	3	11	351	6353	protein import into mitochondrial inner membrane	YJR135W-A|YGR181W|YJL054W
6012	0.019796	0.13225	3	11	351	6353	galactose metabolic process	YBR020W|YBR018C|YBR019C
50896	0.020202	0.13441	66	940	351	6353	response to stimulus	YBL088C|YMR032W|YJR144W|YER020W|YDR004W|YAL019W|YNL021W|YPL240C|YGL127C|YGL208W|YDL013W|YKL209C|YOR266W|YJL095W|YLR229C|YGR002C|YJL157C|YPR093C|YBR020W|YJL110C|YLR426W|YDR096W|YNL307C|YDR359C|YHR204W|YPL042C|YDR135C|YGL209W|YAL023C|YPL242C|YIL036W|YGR086C
6139	0.020635	0.13673	117	1802	351	6353	nucleobase, nucleoside, nucleotide and nucleic acid metabolic process	YML062C|YFL036W|YIL084C|YLR278C|YBL088C|YER051W|YDR037W|YDR004W|YNL236W|YGR103W|YDR181C|YOR025W|YIR029W|YPL104W|YGR002C|YDL209C|YKR054C|YKL216W|YBR061C|YML091C|YGL250W|YBR231C|YML043C|YDR096W|YPL008W|YNL307C|YDR359C|YPL042C|YGL209W|YEL016C|YJL124C|YDR451C
956	0.020977	0.13843	10	87	351	6353	nuclear-transcribed mRNA catabolic process	YOR076C|YDL111C|YPL042C|YGL173C|YNL251C|YER049W|YER146W|YDR206W|YJL124C|YPR189W
6200	0.021272	0.13981	6	40	351	6353	ATP catabolic process	YER036C|YDR135C|YLR249W|YKL188C|YKL209C|YKR054C
70481	0.021946	0.14252	4	20	351	6353	nuclear-transcribed mRNA catabolic process, non-stop decay	YOR076C|YDL111C|YPL042C|YPR189W
741	0.021946	0.14252	4	20	351	6353	karyogamy	YGL173C|YCL055W|YDR356W|YKR054C
15718	0.021946	0.14252	4	20	351	6353	monocarboxylic acid transport	YGR065C|YCR010C|YDR135C|YMR246W
6402	0.022549	0.14585	10	88	351	6353	mRNA catabolic process	YOR076C|YDL111C|YPL042C|YGL173C|YNL251C|YER049W|YER146W|YDR206W|YJL124C|YPR189W
122	0.022891	0.14748	12	114	351	6353	negative regulation of transcription from RNA polymerase II promoter	YPL042C|YNL236W|YGL209W|YIL131C|YCL055W|YJL110C|YBR279W|YOL001W|YDR096W|YNL021W|YJR017C|YDR451C
7264	0.023363	0.14993	9	76	351	6353	small GTPase mediated signal transduction	YPL242C|YKR055W|YLR422W|YHR061C|YNL180C|YOR089C|YLR229C|YJL085W|YNL093W
6839	0.025218	0.15967	9	77	351	6353	mitochondrial transport	YER017C|YNR017W|YJR135W-A|YNL131W|YGR181W|YMR203W|YIL022W|YJL054W|YPL240C
350	0.025335	0.15967	3	12	351	6353	generation of catalytic spliceosome for second transesterification step	YAL032C|YDR364C|YMR213W
31647	0.025335	0.15967	3	12	351	6353	regulation of protein stability	YPL042C|YDL065C|YIL050W
31145	0.025335	0.15967	3	12	351	6353	anaphase-promoting complex-dependent proteasomal ubiquitin-dependent protein catabolic process	YBL084C|YLR127C|YDR118W
51716	0.025386	0.15967	49	674	351	6353	cellular response to stimulus	YBL088C|YMR032W|YER020W|YJR144W|YDR004W|YAL019W|YNL021W|YGL127C|YGL208W|YDL013W|YLR229C|YJL095W|YGR002C|YJL157C|YBR020W|YJL110C|YNL307C|YDR359C|YPL042C|YGL209W|YAL023C|YIL036W|YCL055W|YGL045W|YGL150C|YMR224C|YLR394W|YDL164C|YFR021W|YGL180W|YLR452C|YER118C
9141	0.025849	0.15967	12	116	351	6353	nucleoside triphosphate metabolic process	YOR076C|YER036C|YPL153C|YBR127C|YDR135C|YLR249W|YEL016C|YKL188C|YKL209C|YOR211C|YER020W|YKR054C
184	0.025955	0.15967	5	31	351	6353	nuclear-transcribed mRNA catabolic process, nonsense-mediated decay	YOR076C|YDL111C|YGL173C|YDR206W|YPR189W
30150	0.025961	0.15967	4	21	351	6353	protein import into mitochondrial matrix	YNR017W|YNL131W|YMR203W|YIL022W
6302	0.026101	0.15967	11	103	351	6353	double-strand break repair	YJL092W|YLR383W|YDR227W|YBL088C|YDR180W|YMR224C|YJR144W|YEL019C|YDR004W|YNL307C|YAL019W
6555	0.02652	0.15967	6	42	351	6353	methionine metabolic process	YDR502C|YHR137W|YER091C|YFR055W|YLR303W|YLL058W
60491	0.027233	0.15967	2	5	351	6353	regulation of cell projection assembly	YCL027W|YLR229C
60277	0.027233	0.15967	2	5	351	6353	negative regulation of transcription involved in G1 phase of mitotic cell cycle	YIL131C|YDR451C
1304	0.027233	0.15967	2	5	351	6353	progressive alteration of chromatin involved in replicative cell aging	YDR227W|YNL021W
1308	0.027233	0.15967	2	5	351	6353	loss of chromatin silencing involved in replicative cell aging	YDR227W|YNL021W
70933	0.027233	0.15967	2	5	351	6353	histone H4 deacetylation	YPL116W|YNL021W
70932	0.027233	0.15967	2	5	351	6353	histone H3 deacetylation	YPL116W|YNL021W
6345	0.027233	0.15967	2	5	351	6353	loss of chromatin silencing	YDR227W|YNL021W
6952	0.027233	0.15967	2	5	351	6353	defense response	YGR271W|YPR189W
7535	0.027233	0.15967	2	5	351	6353	donor selection	YIL131C|YPL008W
16255	0.027233	0.15967	2	5	351	6353	attachment of GPI anchor to protein	YDR331W|YHR188C
31344	0.027233	0.15967	2	5	351	6353	regulation of cell projection organization	YCL027W|YLR229C
31383	0.027233	0.15967	2	5	351	6353	regulation of mating projection assembly	YCL027W|YLR229C
7187	0.027233	0.15967	2	5	351	6353	G-protein signaling, coupled to cyclic nucleotide second messenger	YER020W|YOR107W
7188	0.027233	0.15967	2	5	351	6353	G-protein signaling, coupled to cAMP nucleotide second messenger	YER020W|YOR107W
6281	0.027501	0.16067	23	273	351	6353	DNA repair	YPL153C|YBL088C|YGL150C|YDR180W|YOR386W|YMR224C|YJR144W|YDR004W|YLR394W|YDR359C|YNL307C|YAL019W|YJL092W|YGL127C|YLR383W|YDR227W|YDL013W|YKL025C|YDL164C|YBR279W|YDL105W|YGR002C|YEL019C
61025	0.02795	0.16098	8	66	351	6353	membrane fusion	YDR135C|YAL030W|YGL095C|YEL013W|YOR211C|YLR148W|YDR189W|YMR183C
6944	0.02795	0.16098	8	66	351	6353	cellular membrane fusion	YDR135C|YAL030W|YGL095C|YEL013W|YOR211C|YLR148W|YDR189W|YMR183C
7033	0.02795	0.16098	8	66	351	6353	vacuole organization	YDR135C|YOR089C|YGL095C|YOR036W|YGL180W|YEL013W|YLR148W|YDR170C
42325	0.02795	0.16098	8	66	351	6353	regulation of phosphorylation	YDL179W|YNL054W|YGR086C|YBL056W|YJL157C|YOL001W|YJL187C|YIL050W
31325	0.028702	0.16473	26	319	351	6353	positive regulation of cellular metabolic process	YIL036W|YIL084C|YPL116W|YER022W|YCL055W|YGL150C|YNL021W|YBR135W|YPL240C|YNL236W|YHR058C|YOR162C|YPL015C|YNL054W|YBR020W|YML091C|YIL131C|YGL130W|YDR096W|YIL017C|YPL042C|YLR240W|YGL209W|YDR227W|YBR279W|YJR017C
45786	0.029416	0.16824	5	32	351	6353	negative regulation of cell cycle	YAL016W|YJL030W|YDL088C|YGR188C|YJL157C
31667	0.029585	0.16861	11	105	351	6353	response to nutrient levels	YGL208W|YPL042C|YBR020W|YGL209W|YJL110C|YGL180W|YFR021W|YEL013W|YJL095W|YDR096W|YDR170C
22603	0.030388	0.17259	4	22	351	6353	regulation of anatomical structure morphogenesis	YHR061C|YLR342W|YCL027W|YLR229C
45859	0.030538	0.17284	7	55	351	6353	regulation of protein kinase activity	YDL179W|YGR086C|YBL056W|YJL157C|YOL001W|YJL187C|YIL050W
48193	0.031511	0.17773	17	189	351	6353	Golgi vesicle transport	YGL095C|YOR036W|YIL068C|YJL004C|YJL085W|YNL093W|YDR170C|YPL070W|YDR189W|YAL030W|YOR089C|YGR261C|YLR166C|YGL200C|YAL026C|YLR148W|YMR183C
30071	0.033154	0.18635	5	33	351	6353	regulation of mitotic metaphase/anaphase transition	YAL016W|YJL030W|YDL088C|YGR188C|YEL019C
9893	0.033931	0.19006	26	324	351	6353	positive regulation of metabolic process	YIL036W|YIL084C|YPL116W|YER022W|YCL055W|YGL150C|YNL021W|YBR135W|YPL240C|YNL236W|YHR058C|YOR162C|YPL015C|YNL054W|YBR020W|YML091C|YIL131C|YGL130W|YDR096W|YIL017C|YPL042C|YLR240W|YGL209W|YDR227W|YBR279W|YJR017C
10604	0.035261	0.19636	25	310	351	6353	positive regulation of macromolecule metabolic process	YIL036W|YIL084C|YPL116W|YER022W|YCL055W|YGL150C|YNL021W|YBR135W|YPL240C|YNL236W|YHR058C|YOR162C|YPL015C|YBR020W|YML091C|YIL131C|YGL130W|YDR096W|YIL017C|YPL042C|YLR240W|YGL209W|YDR227W|YBR279W|YJR017C
16071	0.035387	0.19636	24	295	351	6353	mRNA metabolic process	YOR076C|YDL111C|YML062C|YDR194C|YAL032C|YML091C|YNL251C|YIL131C|YDR163W|YMR213W|YGL130W|YML049C|YDR206W|YPL042C|YGL173C|YER049W|YKL025C|YDR364C|YER146W|YBR279W|YDL209C|YLR147C|YJL124C|YPR189W
16458	0.035417	0.19636	11	108	351	6353	gene silencing	YIL084C|YBL052C|YDR227W|YDR181C|YGL150C|YAR003W|YOR025W|YBR279W|YAL019W|YNL021W|YPL015C
9203	0.036079	0.19734	9	82	351	6353	ribonucleoside triphosphate catabolic process	YOR076C|YER036C|YDR135C|YLR249W|YKL188C|YKL209C|YOR211C|YER020W|YKR054C
9207	0.036079	0.19734	9	82	351	6353	purine ribonucleoside triphosphate catabolic process	YOR076C|YER036C|YDR135C|YLR249W|YKL188C|YKL209C|YOR211C|YER020W|YKR054C
9154	0.036079	0.19734	9	82	351	6353	purine ribonucleotide catabolic process	YOR076C|YER036C|YDR135C|YLR249W|YKL188C|YKL209C|YOR211C|YER020W|YKR054C
9261	0.036079	0.19734	9	82	351	6353	ribonucleotide catabolic process	YOR076C|YER036C|YDR135C|YLR249W|YKL188C|YKL209C|YOR211C|YER020W|YKR054C
[truncated: 205 more columns]

## Sheet: PheNetic_reactor 6_small
File created with BiNGO (c) on Jan 22, 2015 at 1:49:57 PM
ontology: namespace
curator: bingo
Selected ontology file : jar:file:/home/driesdm/.cytoscape/2.8/plugins/BiNGO-2.44/BiNGO.jar!/GO_Biological_Process
Selected annotation file : /home/driesdm/gene_ontologies/gene_association.sgd
Discarded evidence codes :
Overrepresentation
Selected statistical test : Hypergeometric test
Selected correction : Benjamini & Hochberg False Discovery Rate (FDR) correction
Selected significance level : 0.2
Testing option : Use whole annotation as reference set
The selected cluster :
YER091C	YFL036W	YGR117C	YLR278C	YOR233W	YGL104C	YBR059C	YBL088C	YCR027C	YJR020W	YOR138C	YNL236W	YFL007W	YGR103W	YDR181C	YMR108W	YJL020C	YER081W	YOR025W	YIR029W	YAL036C	YKL216W	YKR054C	YPR144C	YBR061C	YBR020W	YGL250W	YEL002C	YBR231C	YDL203C	YGL184C	YBR195C	YNL307C	YDR359C	YDR189W	YOR157C	YFR014C	YGR261C	YBR153W	YMR246W	YJL187C	YJL124C	YDR451C	YIL036W	YDR194C	YGR086C	YMR265C	YGL206C	YDR485C	YGR271W
No annotations were retrieved for the following entities:
YJR020W	YDR053W	YOR091W	YAL036C
GO-ID	p-value	corr p-value	x	n	X	N	Description	Genes in test set
50794	3.414e-07	0.00019729	54	1373	132	6353	regulation of cellular process	YLR278C|YOR233W|YBR059C|YBL088C|YGL095C|YCR027C|YAL019W|YNL021W|YNL236W|YGR274C|YGL173C|YFL007W|YDR181C|YDL013W|YOR025W|YDL179W|YBR020W|YNL271C|YBR231C|YDR334W|YDL203C|YDR359C|YDR189W|YFR014C|YLR240W|YJL187C|YDR451C|YLR148W|YIL036W|YPL242C|YGR086C|YDR194C
43687	3.6672e-07	0.00019729	28	479	132	6353	post-translational protein modification	YBL084C|YMR075W|YOR233W|YGL141W|YBL088C|YBR059C|YLR127C|YHR188C|YNL021W|YOR138C|YGR274C|YDL013W|YOR025W|YGR188C|YOR064C|YPL015C|YPR093C|YDR306C|YNL307C|YIL030C|YFR014C|YLR240W|YKL025C|YAR003W|YBL056W|YJL187C|YJR017C|YKR029C
50789	1.1124e-06	0.00039898	54	1422	132	6353	regulation of biological process	YLR278C|YOR233W|YBR059C|YBL088C|YGL095C|YCR027C|YAL019W|YNL021W|YNL236W|YGR274C|YGL173C|YFL007W|YDR181C|YDL013W|YOR025W|YDL179W|YBR020W|YNL271C|YBR231C|YDR334W|YDL203C|YDR359C|YDR189W|YFR014C|YLR240W|YJL187C|YDR451C|YLR148W|YIL036W|YPL242C|YGR086C|YDR194C
65007	4.4669e-06	0.0012016	58	1647	132	6353	biological regulation	YLR278C|YOR233W|YBR059C|YBL088C|YGL095C|YCR027C|YAL019W|YNL021W|YNL236W|YGR274C|YGL173C|YFL007W|YDR181C|YDL013W|YOR025W|YDL179W|YBR020W|YNL271C|YBR231C|YDR334W|YDL203C|YDR359C|YDR189W|YFR014C|YLR240W|YJL187C|YDR451C|YLR148W|YIL036W|YPL242C|YGR086C|YDR194C
6325	1.3275e-05	0.0028569	17	249	132	6353	chromatin organization	YMR075W|YDR334W|YBL088C|YBR231C|YBR195C|YDR485C|YNL021W|YDR359C|YAL019W|YGR274C|YDR227W|YDR181C|YOR025W|YAR003W|YBR279W|YOR064C|YKR029C
16568	1.8573e-05	0.0032636	15	204	132	6353	chromatin modification	YMR075W|YDR334W|YBL088C|YBR231C|YDR485C|YDR359C|YAL019W|YNL021W|YGR274C|YDR227W|YDR181C|YOR025W|YAR003W|YOR064C|YKR029C
6464	2.1232e-05	0.0032636	29	622	132	6353	protein modification process	YBL084C|YMR075W|YOR233W|YGL141W|YBL088C|YBR059C|YLR127C|YHR188C|YNL021W|YOR138C|YGR274C|YDL013W|YOR025W|YGR188C|YOR064C|YPL015C|YPR093C|YEL002C|YDR306C|YNL307C|YIL030C|YFR014C|YLR240W|YKL025C|YAR003W|YBL056W|YJL187C|YJR017C|YKR029C
44087	4.6741e-05	0.0062866	8	64	132	6353	regulation of cellular component biogenesis	YKR055W|YIL159W|YNL271C|YCL027W|YGL095C|YJR017C|YLR148W|YDR189W
51276	6.4186e-05	0.0076737	22	430	132	6353	chromosome organization	YMR075W|YDR334W|YBL088C|YBR231C|YBR195C|YIL149C|YDR485C|YNL021W|YAL019W|YNL307C|YDR359C|YGR274C|YDR227W|YDR181C|YDL013W|YAR003W|YOR025W|YBR279W|YGR188C|YOR064C|YKR054C|YKR029C
43412	7.6887e-05	0.008273	32	772	132	6353	macromolecule modification	YBL084C|YMR075W|YOR233W|YGL141W|YBL088C|YBR059C|YLR127C|YHR188C|YNL021W|YOR138C|YGR274C|YDL013W|YOR025W|YGR188C|YOR064C|YPL015C|YPR093C|YBR061C|YEL002C|YDR306C|YNL307C|YIL030C|YFR014C|YLR240W|YKL025C|YAR003W|YBL056W|YDR165W|YJL187C|YOR251C|YJR017C|YKR029C
6476	8.9398e-05	0.0087447	5	23	132	6353	protein amino acid deacetylation	YMR075W|YOR025W|YNL021W|YPL015C|YKR029C
6996	0.00016414	0.014718	44	1262	132	6353	organelle organization	YPL242C|YBL084C|YFL036W|YMR075W|YIR006C|YBL088C|YBR059C|YGL095C|YLR127C|YDR485C|YNL021W|YAL019W|YGR274C|YGL173C|YBR108W|YDR181C|YBL034C|YDL013W|YJL020C|YOR266W|YOR025W|YGR188C|YAL026C|YOR064C|YKR054C|YNR016C|YNL271C|YDR334W|YBR231C|YBR195C|YIL149C|YDR359C
43254	0.00033995	0.028137	6	46	132	6353	regulation of protein complex assembly	YIL159W|YNL271C|YGL095C|YJR017C|YLR148W|YDR189W
70649	0.0004285	0.028817	2	2	132	6353	formin-nucleated actin cable assembly	YIL159W|YNL271C
35543	0.0004285	0.028817	2	2	132	6353	positive regulation of SNARE complex assembly	YGL095C|YDR189W
71266	0.0004285	0.028817	2	2	132	6353	'de novo' L-methionine biosynthetic process	YLR303W|YGL184C
10468	0.0005795	0.034596	31	823	132	6353	regulation of gene expression	YIL036W|YDR194C|YMR075W|YLR278C|YGR271W|YDR485C|YAL019W|YNL021W|YNL236W|YGR274C|YDR181C|YDL013W|YOR025W|YOR064C|YOR162C|YPL015C|YDL179W|YGL195W|YBR020W|YBR231C|YDR334W|YIL149C|YDR359C|YLR240W|YDR227W|YAR003W|YBR279W|YJR017C|YHR064C|YDR451C|YKR029C
6355	0.0006623	0.034596	27	682	132	6353	regulation of transcription, DNA-dependent	YIL036W|YLR278C|YMR075W|YDR485C|YAL019W|YNL021W|YNL236W|YGR274C|YDR181C|YDL013W|YOR025W|YOR064C|YOR162C|YPL015C|YDL179W|YBR020W|YBR231C|YDR334W|YIL149C|YDR359C|YLR240W|YDR227W|YAR003W|YBR279W|YJR017C|YDR451C|YKR029C
31323	0.0006658	0.034596	36	1021	132	6353	regulation of cellular metabolic process	YPL242C|YIL036W|YDR194C|YGR086C|YMR075W|YLR278C|YDR485C|YGR271W|YAL019W|YNL021W|YNL236W|YGR274C|YFL007W|YDR181C|YDL013W|YOR025W|YOR064C|YOR162C|YPL015C|YDL179W|YGL195W|YBR020W|YDR334W|YBR231C|YIL149C|YDR359C|YLR240W|YDR227W|YAR003W|YBR279W|YBL056W|YJL187C
35542	0.00067208	0.034596	3	9	132	6353	regulation of SNARE complex assembly	YGL095C|YLR148W|YDR189W
16043	0.0006752	0.034596	54	1763	132	6353	cellular component organization	YBL084C|YFL036W|YIR006C|YBR059C|YBL088C|YGL095C|YLR127C|YAL019W|YNL021W|YNL236W|YGR274C|YGL173C|YFL007W|YDR181C|YJL020C|YDL013W|YOR025W|YOR266W|YAL026C|YKR054C|YNL271C|YBR231C|YDR334W|YDL203C|YBR195C|YDR359C|YNL307C|YDR189W|YLR240W|YDR135C|YER166W|YJL187C
10556	0.00072833	0.035622	31	834	132	6353	regulation of macromolecule biosynthetic process	YIL036W|YDR194C|YMR075W|YLR278C|YGR271W|YDR485C|YAL019W|YNL021W|YNL236W|YGR274C|YDR181C|YDL013W|YOR025W|YOR064C|YOR162C|YPL015C|YDL179W|YGL195W|YBR020W|YBR231C|YDR334W|YIL149C|YDR359C|YLR240W|YDR227W|YAR003W|YBR279W|YJR017C|YHR064C|YDR451C|YKR029C
45449	0.00079384	0.036311	27	690	132	6353	regulation of transcription	YIL036W|YLR278C|YMR075W|YDR485C|YAL019W|YNL021W|YNL236W|YGR274C|YDR181C|YDL013W|YOR025W|YOR064C|YOR162C|YPL015C|YDL179W|YBR020W|YBR231C|YDR334W|YIL149C|YDR359C|YLR240W|YDR227W|YAR003W|YBR279W|YJR017C|YDR451C|YKR029C
16575	0.00080991	0.036311	4	21	132	6353	histone deacetylation	YMR075W|YOR025W|YNL021W|YKR029C
16570	0.00092022	0.036739	8	98	132	6353	histone modification	YGR274C|YMR075W|YBL088C|YAR003W|YOR025W|YOR064C|YNL021W|YKR029C
16569	0.00092022	0.036739	8	98	132	6353	covalent chromatin modification	YGR274C|YMR075W|YBL088C|YAR003W|YOR025W|YOR064C|YNL021W|YKR029C
31338	0.00094557	0.036739	3	10	132	6353	regulation of vesicle fusion	YGL095C|YLR148W|YDR189W
19222	0.00096128	0.036739	36	1041	132	6353	regulation of metabolic process	YPL242C|YIL036W|YDR194C|YGR086C|YMR075W|YLR278C|YDR485C|YGR271W|YAL019W|YNL021W|YNL236W|YGR274C|YFL007W|YDR181C|YDL013W|YOR025W|YOR064C|YOR162C|YPL015C|YDL179W|YGL195W|YBR020W|YDR334W|YBR231C|YIL149C|YDR359C|YLR240W|YDR227W|YAR003W|YBR279W|YBL056W|YJL187C
51252	0.00099018	0.036739	27	700	132	6353	regulation of RNA metabolic process	YIL036W|YLR278C|YMR075W|YDR485C|YAL019W|YNL021W|YNL236W|YGR274C|YDR181C|YDL013W|YOR025W|YOR064C|YOR162C|YPL015C|YDL179W|YBR020W|YBR231C|YDR334W|YIL149C|YDR359C|YLR240W|YDR227W|YAR003W|YBR279W|YJR017C|YDR451C|YKR029C
278	0.0010338	0.037078	15	293	132	6353	mitotic cell cycle	YBL084C|YDL179W|YNL271C|YLR127C|YNL307C|YGL173C|YBL034C|YDL164C|YDR364C|YBR279W|YGR188C|YKR054C|YJL187C|YJR017C|YDR451C
31326	0.0011089	0.038019	31	855	132	6353	regulation of cellular biosynthetic process	YIL036W|YDR194C|YMR075W|YLR278C|YGR271W|YDR485C|YAL019W|YNL021W|YNL236W|YGR274C|YDR181C|YDL013W|YOR025W|YOR064C|YOR162C|YPL015C|YDL179W|YGL195W|YBR020W|YBR231C|YDR334W|YIL149C|YDR359C|YLR240W|YDR227W|YAR003W|YBR279W|YJR017C|YHR064C|YDR451C|YKR029C
9889	0.0011307	0.038019	31	856	132	6353	regulation of biosynthetic process	YIL036W|YDR194C|YMR075W|YLR278C|YGR271W|YDR485C|YAL019W|YNL021W|YNL236W|YGR274C|YDR181C|YDL013W|YOR025W|YOR064C|YOR162C|YPL015C|YDL179W|YGL195W|YBR020W|YBR231C|YDR334W|YIL149C|YDR359C|YLR240W|YDR227W|YAR003W|YBR279W|YJR017C|YHR064C|YDR451C|YKR029C
31340	0.001268	0.041344	2	3	132	6353	positive regulation of vesicle fusion	YGL095C|YDR189W
33043	0.0014986	0.046688	10	157	132	6353	regulation of organelle organization	YKR055W|YIL159W|YNL271C|YGL095C|YBR279W|YGR188C|YJL187C|YJR017C|YLR148W|YDR189W
60255	0.0015187	0.046688	32	910	132	6353	regulation of macromolecule metabolic process	YIL036W|YDR194C|YMR075W|YLR278C|YDR485C|YGR271W|YAL019W|YNL021W|YNL236W|YGR274C|YFL007W|YDR181C|YDL013W|YOR025W|YOR064C|YOR162C|YPL015C|YDL179W|YGL195W|YBR020W|YBR231C|YDR334W|YIL149C|YDR359C|YLR240W|YDR227W|YAR003W|YBR279W|YJR017C|YHR064C|YDR451C|YKR029C
16458	0.0017311	0.048936	8	108	132	6353	gene silencing	YDR227W|YDR181C|YAR003W|YOR025W|YBR279W|YNL021W|YAL019W|YPL015C
7049	0.0021149	0.048936	23	589	132	6353	cell cycle	YPL242C|YBL084C|YDL179W|YNL271C|YGL250W|YIR006C|YEL002C|YIL149C|YLR127C|YML049C|YNL307C|YGL173C|YGR103W|YBL034C|YDL164C|YDR364C|YBR279W|YGR188C|YKR054C|YJL187C|YJR017C|YDR451C|YKR029C
51128	0.0021196	0.048936	12	222	132	6353	regulation of cellular component organization	YKR055W|YIL159W|YNL271C|YBR059C|YCL027W|YGL095C|YBR279W|YGR188C|YJL187C|YJR017C|YLR148W|YDR189W
114	0.0021529	0.048936	3	13	132	6353	regulation of transcription involved in G1 phase of mitotic cell cycle	YBR279W|YJR017C|YDR451C
6904	0.0021529	0.048936	3	13	132	6353	vesicle docking involved in exocytosis	YGL095C|YLR148W|YDR189W
45892	0.002201	0.048936	12	223	132	6353	negative regulation of transcription, DNA-dependent	YNL236W|YMR075W|YDR227W|YDR181C|YAR003W|YOR025W|YBR279W|YNL021W|YAL019W|YJR017C|YPL015C|YDR451C
16481	0.002201	0.048936	12	223	132	6353	negative regulation of transcription	YNL236W|YMR075W|YDR227W|YDR181C|YAR003W|YOR025W|YBR279W|YNL021W|YAL019W|YJR017C|YPL015C|YDR451C
51253	0.0022849	0.048936	12	224	132	6353	negative regulation of RNA metabolic process	YNL236W|YMR075W|YDR227W|YDR181C|YAR003W|YOR025W|YBR279W|YNL021W|YAL019W|YJR017C|YPL015C|YDR451C
34641	0.0024688	0.048936	58	2034	132	6353	cellular nitrogen compound metabolic process	YER091C|YFL036W|YLR278C|YBL088C|YCR027C|YAL019W|YNL021W|YNL236W|YGR274C|YGL173C|YGR103W|YDR181C|YMR108W|YDL013W|YER081W|YOR025W|YKL209C|YIR029W|YKR054C|YKL216W|YPR144C|YBR061C|YGL250W|YBR231C|YDR334W|YGL184C|YDR359C|YNL307C|YDR135C|YBR153W|YDR165W|YJL124C
80090	0.0024834	0.048936	33	977	132	6353	regulation of primary metabolic process	YPL242C|YIL036W|YDR194C|YMR075W|YLR278C|YDR485C|YGR271W|YAL019W|YNL021W|YNL236W|YGR274C|YFL007W|YDR181C|YDL013W|YOR025W|YOR064C|YOR162C|YPL015C|YDL179W|YGL195W|YBR020W|YBR231C|YDR334W|YIL149C|YDR359C|YLR240W|YDR227W|YAR003W|YBR279W|YJR017C|YHR064C|YDR451C
2252	0.0025014	0.048936	2	4	132	6353	immune effector process	YGR271W|YPR189W
2376	0.0025014	0.048936	2	4	132	6353	immune system process	YGR271W|YPR189W
6955	0.0025014	0.048936	2	4	132	6353	immune response	YGR271W|YPR189W
51016	0.0025014	0.048936	2	4	132	6353	barbed-end actin filament capping	YIL159W|YNL271C
51607	0.0025014	0.048936	2	4	132	6353	defense response to virus	YGR271W|YPR189W
51693	0.0025014	0.048936	2	4	132	6353	actin filament capping	YIL159W|YNL271C
51707	0.0025014	0.048936	2	4	132	6353	response to other organism	YGR271W|YPR189W
30834	0.0025014	0.048936	2	4	132	6353	regulation of actin filament depolymerization	YIL159W|YNL271C
30835	0.0025014	0.048936	2	4	132	6353	negative regulation of actin filament depolymerization	YIL159W|YNL271C
9615	0.0025014	0.048936	2	4	132	6353	response to virus	YGR271W|YPR189W
10629	0.0026474	0.050191	12	228	132	6353	negative regulation of gene expression	YNL236W|YMR075W|YDR227W|YDR181C|YAR003W|YOR025W|YBR279W|YNL021W|YAL019W|YJR017C|YPL015C|YDR451C
43486	0.0026987	0.050191	3	14	132	6353	histone exchange	YDR334W|YBR231C|YDR485C
9987	0.0027055	0.050191	119	5142	132	6353	cellular process	YFL036W|YER091C|YLR278C|YGL104C|YOR233W|YBL088C|YBR059C|YCR027C|YNL236W|YOR138C|YGR103W|YFL007W|YDR181C|YMR108W|YJL020C|YER081W|YOR025W|YIR029W|YKL216W|YKR054C|YPR144C|YBR061C|YBR020W|YGL250W|YEL002C|YBR231C|YBR195C|YGL184C|YDL203C|YDR359C|YNL307C|YOR157C
80	0.0028264	0.050688	4	29	132	6353	G1 phase of mitotic cell cycle	YGL173C|YBR279W|YJR017C|YDR451C
51318	0.0028264	0.050688	4	29	132	6353	G1 phase	YGL173C|YBR279W|YJR017C|YDR451C
6468	0.0032157	0.056723	9	146	132	6353	protein amino acid phosphorylation	YFR014C|YLR240W|YOR233W|YBL088C|YBR059C|YKL025C|YGR188C|YJL187C|YNL307C
51329	0.0034533	0.058998	7	95	132	6353	interphase of mitotic cell cycle	YDL179W|YGL173C|YDR364C|YBR279W|YJL187C|YJR017C|YDR451C
7010	0.0035599	0.058998	11	206	132	6353	cytoskeleton organization	YPL242C|YIL159W|YBR108W|YNL271C|YIR006C|YBL034C|YBR059C|YJL020C|YIL149C|YGR188C|YKR054C
30036	0.0036617	0.058998	7	96	132	6353	actin cytoskeleton organization	YPL242C|YIL159W|YBR108W|YNL271C|YIR006C|YBR059C|YJL020C
51325	0.0036617	0.058998	7	96	132	6353	interphase	YDL179W|YGL173C|YDR364C|YBR279W|YJL187C|YJR017C|YDR451C
6807	0.0037429	0.058998	58	2068	132	6353	nitrogen compound metabolic process	YER091C|YFL036W|YLR278C|YBL088C|YCR027C|YAL019W|YNL021W|YNL236W|YGR274C|YGL173C|YGR103W|YDR181C|YMR108W|YDL013W|YER081W|YOR025W|YKL209C|YIR029W|YKR054C|YKL216W|YPR144C|YBR061C|YGL250W|YBR231C|YDR334W|YGL184C|YDR359C|YNL307C|YDR135C|YBR153W|YDR165W|YJL124C
19219	0.0038015	0.058998	28	806	132	6353	regulation of nucleobase, nucleoside, nucleotide and nucleic acid metabolic process	YIL036W|YPL242C|YLR278C|YMR075W|YDR485C|YAL019W|YNL021W|YNL236W|YGR274C|YDR181C|YDL013W|YOR025W|YOR064C|YOR162C|YPL015C|YDL179W|YBR020W|YBR231C|YDR334W|YIL149C|YDR359C|YLR240W|YDR227W|YAR003W|YBR279W|YJR017C|YDR451C|YKR029C
51171	0.0040085	0.058998	28	809	132	6353	regulation of nitrogen compound metabolic process	YIL036W|YPL242C|YLR278C|YMR075W|YDR485C|YAL019W|YNL021W|YNL236W|YGR274C|YDR181C|YDL013W|YOR025W|YOR064C|YOR162C|YPL015C|YDL179W|YBR020W|YBR231C|YDR334W|YIL149C|YDR359C|YLR240W|YDR227W|YAR003W|YBR279W|YJR017C|YDR451C|YKR029C
40029	0.0041056	0.058998	8	124	132	6353	regulation of gene expression, epigenetic	YDR227W|YDR181C|YAR003W|YOR025W|YBR279W|YNL021W|YAL019W|YPL015C
16567	0.0041073	0.058998	7	98	132	6353	protein ubiquitination	YPR093C|YBL084C|YDR306C|YGL141W|YDL013W|YLR127C|YIL030C
6345	0.0041123	0.058998	2	5	132	6353	loss of chromatin silencing	YDR227W|YNL021W
6952	0.0041123	0.058998	2	5	132	6353	defense response	YGR271W|YPR189W
1304	0.0041123	0.058998	2	5	132	6353	progressive alteration of chromatin involved in replicative cell aging	YDR227W|YNL021W
1308	0.0041123	0.058998	2	5	132	6353	loss of chromatin silencing involved in replicative cell aging	YDR227W|YNL021W
1676	0.0041123	0.058998	2	5	132	6353	long-chain fatty acid metabolic process	YMR246W|YNR016C
48523	0.0045106	0.063828	17	409	132	6353	negative regulation of cellular process	YMR075W|YNL271C|YAL019W|YNL021W|YNL236W|YIL159W|YDR227W|YDR181C|YOR025W|YAR003W|YBR279W|YGR188C|YJL187C|YJR017C|YPL015C|YDR451C|YKR029C
60627	0.0045676	0.063828	4	33	132	6353	regulation of vesicle-mediated transport	YBR059C|YGL095C|YLR148W|YDR189W
30029	0.0051207	0.069571	7	102	132	6353	actin filament-based process	YPL242C|YIL159W|YBR108W|YNL271C|YIR006C|YBR059C|YJL020C
6350	0.0051726	0.069571	21	558	132	6353	transcription	YIL036W|YFL036W|YMR075W|YLR278C|YDR334W|YBR231C|YNL021W|YDR359C|YGR274C|YNL236W|YDR227W|YDR181C|YDL013W|YOR025W|YBR279W|YOR064C|YOR162C|YJR017C|YPL015C|YDR451C|YKR029C
6351	0.0051726	0.069571	21	558	132	6353	transcription, DNA-dependent	YIL036W|YFL036W|YMR075W|YLR278C|YDR334W|YBR231C|YNL021W|YDR359C|YGR274C|YNL236W|YDR227W|YDR181C|YDL013W|YOR025W|YBR279W|YOR064C|YOR162C|YJR017C|YPL015C|YDR451C|YKR029C
32774	0.0055005	0.072923	21	561	132	6353	RNA biosynthetic process	YIL036W|YFL036W|YMR075W|YLR278C|YDR334W|YBR231C|YNL021W|YDR359C|YGR274C|YNL236W|YDR227W|YDR181C|YDL013W|YOR025W|YBR279W|YOR064C|YOR162C|YJR017C|YPL015C|YDR451C|YKR029C
48519	0.005608	0.072923	17	418	132	6353	negative regulation of biological process	YMR075W|YNL271C|YAL019W|YNL021W|YNL236W|YIL159W|YDR227W|YDR181C|YOR025W|YAR003W|YBR279W|YGR188C|YJL187C|YJR017C|YPL015C|YDR451C|YKR029C
45814	0.0056929	0.072923	7	104	132	6353	negative regulation of gene expression, epigenetic	YDR227W|YDR181C|YAR003W|YOR025W|YBR279W|YAL019W|YPL015C
6342	0.0056929	0.072923	7	104	132	6353	chromatin silencing	YDR227W|YDR181C|YAR003W|YOR025W|YBR279W|YAL019W|YPL015C
45934	0.006118	0.076547	12	253	132	6353	negative regulation of nucleobase, nucleoside, nucleotide and nucleic acid metabolic process	YNL236W|YMR075W|YDR227W|YDR181C|YAR003W|YOR025W|YBR279W|YNL021W|YAL019W|YJR017C|YPL015C|YDR451C
51172	0.006118	0.076547	12	253	132	6353	negative regulation of nitrogen compound metabolic process	YNL236W|YMR075W|YDR227W|YDR181C|YAR003W|YOR025W|YBR279W|YNL021W|YAL019W|YJR017C|YPL015C|YDR451C
43044	0.0062676	0.077517	4	36	132	6353	ATP-dependent chromatin remodeling	YDR334W|YBR231C|YDR485C|YAL019W
60968	0.0076076	0.091976	4	38	132	6353	regulation of gene silencing	YDR227W|YBR279W|YNL021W|YPL015C
31935	0.0076076	0.091976	4	38	132	6353	regulation of chromatin silencing	YDR227W|YBR279W|YNL021W|YPL015C
10558	0.008017	0.095848	12	262	132	6353	negative regulation of macromolecule biosynthetic process	YNL236W|YMR075W|YDR227W|YDR181C|YAR003W|YOR025W|YBR279W|YNL021W|YAL019W|YJR017C|YPL015C|YDR451C
46856	0.008403	0.096188	2	7	132	6353	phosphoinositide dephosphorylation	YOR109W|YKL212W
31334	0.008403	0.096188	2	7	132	6353	positive regulation of protein complex assembly	YGL095C|YDR189W
1301	0.008403	0.096188	2	7	132	6353	progressive alteration of chromatin involved in cell aging	YDR227W|YNL021W
30837	0.008403	0.096188	2	7	132	6353	negative regulation of actin filament polymerization	YIL159W|YNL271C
6200	0.0091238	0.10334	4	40	132	6353	ATP catabolic process	YDR135C|YKL188C|YKL209C|YKR054C
48278	0.010115	0.11337	3	22	132	6353	vesicle docking	YGL095C|YLR148W|YDR189W
6139	0.01066	0.11825	50	1802	132	6353	nucleobase, nucleoside, nucleotide and nucleic acid metabolic process	YFL036W|YLR278C|YBL088C|YCR027C|YAL019W|YNL021W|YNL236W|YGR274C|YGL173C|YGR103W|YDR181C|YDL013W|YOR025W|YKL209C|YIR029W|YKL216W|YKR054C|YPR144C|YBR061C|YGL250W|YBR231C|YDR334W|YDR359C|YNL307C|YDR135C|YDR165W|YJL124C|YDR451C|YIL036W|YDR194C|YMR075W|YDL148C
32272	0.011052	0.11892	2	8	132	6353	negative regulation of protein polymerization	YIL159W|YNL271C
45332	0.011052	0.11892	2	8	132	6353	phospholipid translocation	YER166W|YAL026C
46839	0.011052	0.11892	2	8	132	6353	phospholipid dephosphorylation	YOR109W|YKL212W
183	0.011458	0.12087	3	23	132	6353	chromatin silencing at rDNA	YBR279W|YAL019W|YPL015C
22406	0.011458	0.12087	3	23	132	6353	membrane docking	YGL095C|YLR148W|YDR189W
16070	0.011915	0.12447	36	1206	132	6353	RNA metabolic process	YIL036W|YFL036W|YDR194C|YMR075W|YLR278C|YDL148C|YNL021W|YNL236W|YGR274C|YGL173C|YGR103W|YDR181C|YDL013W|YOR025W|YOR064C|YOR162C|YPR144C|YPL015C|YBR061C|YDR334W|YBR231C|YDR163W|YML049C|YDR359C|YDR227W|YKL025C|YDR364C|YBR279W|YDR165W|YJL124C|YOR251C|YPR189W
70647	0.012069	0.12486	8	149	132	6353	protein modification by small protein conjugation or removal	YPR093C|YBL084C|YOR138C|YDR306C|YGL141W|YDL013W|YLR127C|YIL030C
32446	0.01267	0.12733	7	121	132	6353	protein modification by small protein conjugation	YPR093C|YBL084C|YDR306C|YGL141W|YDL013W|YLR127C|YIL030C
9890	0.012844	0.12733	12	279	132	6353	negative regulation of biosynthetic process	YNL236W|YMR075W|YDR227W|YDR181C|YAR003W|YOR025W|YBR279W|YNL021W|YAL019W|YJR017C|YPL015C|YDR451C
31327	0.012844	0.12733	12	279	132	6353	negative regulation of cellular biosynthetic process	YNL236W|YMR075W|YDR227W|YDR181C|YAR003W|YOR025W|YBR279W|YNL021W|YAL019W|YJR017C|YPL015C|YDR451C
32956	0.012899	0.12733	3	24	132	6353	regulation of actin cytoskeleton organization	YKR055W|YIL159W|YNL271C
32970	0.012899	0.12733	3	24	132	6353	regulation of actin filament-based process	YKR055W|YIL159W|YNL271C
16310	0.013534	0.13239	12	281	132	6353	phosphorylation	YOR109W|YFR014C|YLR240W|YBR020W|YOR233W|YBL088C|YBR059C|YKL025C|YGR188C|YPR191W|YJL187C|YNL307C
34204	0.014018	0.13589	2	9	132	6353	lipid translocation	YER166W|YAL026C
22402	0.014496	0.13926	18	499	132	6353	cell cycle process	YBL084C|YDL179W|YNL271C|YGL250W|YIR006C|YIL149C|YLR127C|YNL307C|YGL173C|YBL034C|YDR364C|YBR279W|YGR188C|YKR054C|YJL187C|YJR017C|YDR451C|YKR029C
61024	0.015775	0.14539	12	287	132	6353	membrane organization	YOR109W|YGR086C|YDR135C|YIR006C|YER166W|YGL095C|YGL206C|YOR266W|YAL026C|YLR148W|YNR016C|YDR189W
10605	0.015775	0.14539	12	287	132	6353	negative regulation of macromolecule metabolic process	YNL236W|YMR075W|YDR227W|YDR181C|YAR003W|YOR025W|YBR279W|YNL021W|YAL019W|YJR017C|YPL015C|YDR451C
16044	0.015775	0.14539	12	287	132	6353	cellular membrane organization	YOR109W|YGR086C|YDR135C|YIR006C|YER166W|YGL095C|YGL206C|YOR266W|YAL026C|YLR148W|YNR016C|YDR189W
6897	0.015905	0.14539	6	98	132	6353	endocytosis	YOR109W|YGR086C|YIR006C|YER166W|YGL206C|YAL026C
45815	0.016079	0.14539	3	26	132	6353	positive regulation of gene expression, epigenetic	YDR227W|YNL021W|YPL015C
60969	0.016079	0.14539	3	26	132	6353	negative regulation of gene silencing	YDR227W|YNL021W|YPL015C
31936	0.016079	0.14539	3	26	132	6353	negative regulation of chromatin silencing	YDR227W|YNL021W|YPL015C
48522	0.017235	0.15246	14	361	132	6353	positive regulation of cellular process	YIL036W|YBR020W|YGL095C|YDL203C|YNL021W|YDR189W|YNL236W|YKR055W|YLR240W|YDR227W|YBR279W|YOR162C|YJR017C|YPL015C
43242	0.017286	0.15246	2	10	132	6353	negative regulation of protein complex disassembly	YIL159W|YNL271C
31333	0.017286	0.15246	2	10	132	6353	negative regulation of protein complex assembly	YIL159W|YNL271C
79	0.017819	0.15372	3	27	132	6353	regulation of cyclin-dependent protein kinase activity	YDL179W|YBL056W|YJL187C
31938	0.017819	0.15372	3	27	132	6353	regulation of chromatin silencing at telomere	YBR279W|YNL021W|YPL015C
6796	0.018001	0.15372	14	363	132	6353	phosphate metabolic process	YOR109W|YKL212W|YFR014C|YLR240W|YBR020W|YOR233W|YBL088C|YBR059C|YKL025C|YGR188C|YBL056W|YPR191W|YJL187C|YNL307C
6793	0.018001	0.15372	14	363	132	6353	phosphorus metabolic process	YOR109W|YKL212W|YFR014C|YLR240W|YBR020W|YOR233W|YBL088C|YBR059C|YKL025C|YGR188C|YBL056W|YPR191W|YJL187C|YNL307C
44248	0.019191	0.15445	22	669	132	6353	cellular catabolic process	YBL084C|YDR306C|YGL141W|YLR127C|YCR027C|YAL019W|YIL030C|YDR170C|YOR157C|YLR240W|YGL173C|YDR135C|YDR181C|YKL188C|YFR052W|YKL209C|YIR029W|YDL168W|YKR054C|YJL124C|YPR189W|YFR044C
90304	0.020356	0.15445	43	1553	132	6353	nucleic acid metabolic process	YIL036W|YFL036W|YDR194C|YMR075W|YLR278C|YBL088C|YDL148C|YNL021W|YAL019W|YGR274C|YNL236W|YGL173C|YGR103W|YDR181C|YDL013W|YDL164C|YOR025W|YOR064C|YOR162C|YPR144C|YPL015C|YBR061C|YGL250W|YDR334W|YBR231C|YDR163W|YML049C|YNL307C|YDR359C|YDR227W|YKL025C|YDR364C
48518	0.020455	0.15445	14	369	132	6353	positive regulation of biological process	YIL036W|YBR020W|YGL095C|YDL203C|YNL021W|YDR189W|YNL236W|YKR055W|YLR240W|YDR227W|YBR279W|YOR162C|YJR017C|YPL015C
22403	0.020658	0.15445	15	406	132	6353	cell cycle phase	YBL084C|YDL179W|YGL250W|YLR127C|YNL307C|YGL173C|YBL034C|YDR364C|YBR279W|YGR188C|YKR054C|YJL187C|YJR017C|YDR451C|YKR029C
35307	0.020778	0.15445	1	1	132	6353	positive regulation of protein amino acid dephosphorylation	YJR017C
35306	0.020778	0.15445	1	1	132	6353	positive regulation of dephosphorylation	YJR017C
373	0.020778	0.15445	1	1	132	6353	Group II intron splicing	YDR194C
770	0.020778	0.15445	1	1	132	6353	peptide pheromone export	YKL209C
10621	0.020778	0.15445	1	1	132	6353	negative regulation of transcription by transcription factor localization	YNL021W
71519	0.020778	0.15445	1	1	132	6353	actin filament bundle assembly involved in actomyosin contractile ring formation	YNL271C
90311	0.020778	0.15445	1	1	132	6353	regulation of protein amino acid deacetylation	YJR017C
42759	0.020778	0.15445	1	1	132	6353	long-chain fatty acid biosynthetic process	YNR016C
10212	0.020778	0.15445	1	1	132	6353	response to ionizing radiation	YBL088C
31063	0.020778	0.15445	1	1	132	6353	regulation of histone deacetylation	YJR017C
31064	0.020778	0.15445	1	1	132	6353	negative regulation of histone deacetylation	YJR017C
6069	0.020778	0.15445	1	1	132	6353	ethanol oxidation	YDL168W
48210	0.020778	0.15445	1	1	132	6353	Golgi vesicle fusion to target membrane	YGL095C
34337	0.020778	0.15445	1	1	132	6353	RNA folding	YDR194C
51017	0.020843	0.15445	2	11	132	6353	actin filament bundle assembly	YIL159W|YNL271C
51493	0.020957	0.15445	4	51	132	6353	regulation of cytoskeleton organization	YKR055W|YIL159W|YNL271C|YJL187C
44238	0.021263	0.15564	87	3618	132	6353	primary metabolic process	YBL084C|YER091C|YFL036W|YLR278C|YGL141W|YOR233W|YBR059C|YBL088C|YHR188C|YLR127C|YCR027C|YNL021W|YAL019W|YKL212W|YGR274C|YOR138C|YNL236W|YGL173C|YGR103W|YDR181C|YMR108W|YDL013W|YER081W|YKL209C|YOR025W|YIR029W|YKR054C|YKL216W|YPR144C|YPR093C|YBR061C|YBR020W
44270	0.023503	0.17087	6	107	132	6353	cellular nitrogen compound catabolic process	YDR135C|YKL188C|YKL209C|YIR029W|YCR027C|YKR054C
43161	0.024475	0.1713	6	108	132	6353	proteasomal ubiquitin-dependent protein catabolic process	YBL084C|YDR306C|YGL141W|YLR127C|YIL030C|YOR157C
10498	0.024475	0.1713	6	108	132	6353	proteasomal protein catabolic process	YBL084C|YDR306C|YGL141W|YLR127C|YIL030C|YOR157C
132	0.024676	0.1713	2	12	132	6353	establishment of mitotic spindle orientation	YNL271C|YKR054C
40001	0.024676	0.1713	2	12	132	6353	establishment of mitotic spindle localization	YNL271C|YKR054C
71265	0.024676	0.1713	2	12	132	6353	L-methionine biosynthetic process	YLR303W|YGL184C
51294	0.024676	0.1713	2	12	132	6353	establishment of spindle orientation	YNL271C|YKR054C
31145	0.024676	0.1713	2	12	132	6353	anaphase-promoting complex-dependent proteasomal ubiquitin-dependent protein catabolic process	YBL084C|YLR127C
31324	0.026462	0.18252	12	309	132	6353	negative regulation of cellular metabolic process	YNL236W|YMR075W|YDR227W|YDR181C|YAR003W|YOR025W|YBR279W|YNL021W|YAL019W|YJR017C|YPL015C|YDR451C
45859	0.026853	0.18312	4	55	132	6353	regulation of protein kinase activity	YDL179W|YGR086C|YBL056W|YJL187C
9203	0.027399	0.18312	5	82	132	6353	ribonucleoside triphosphate catabolic process	YDR135C|YKL188C|YKL209C|YCR027C|YKR054C
9207	0.027399	0.18312	5	82	132	6353	purine ribonucleoside triphosphate catabolic process	YDR135C|YKL188C|YKL209C|YCR027C|YKR054C
9154	0.027399	0.18312	5	82	132	6353	purine ribonucleotide catabolic process	YDR135C|YKL188C|YKL209C|YCR027C|YKR054C
9261	0.027399	0.18312	5	82	132	6353	ribonucleotide catabolic process	YDR135C|YKL188C|YKL209C|YCR027C|YKR054C
30258	0.028038	0.18425	3	32	132	6353	lipid modification	YOR109W|YKL212W|YLR240W
7165	0.028643	0.18425	11	277	132	6353	signal transduction	YPL242C|YKR055W|YFR014C|YLR240W|YOR233W|YBL088C|YHR182W|YGR188C|YBL056W|YCR027C|YJL187C
9146	0.028686	0.18425	5	83	132	6353	purine nucleoside triphosphate catabolic process	YDR135C|YKL188C|YKL209C|YCR027C|YKR054C
8064	0.028771	0.18425	2	13	132	6353	regulation of actin polymerization or depolymerization	YIL159W|YNL271C
30832	0.028771	0.18425	2	13	132	6353	regulation of actin filament length	YIL159W|YNL271C
30833	0.028771	0.18425	2	13	132	6353	regulation of actin filament polymerization	YIL159W|YNL271C
65008	0.029135	0.18425	15	424	132	6353	regulation of biological quality	YNL271C|YBL088C|YGL095C|YCL027W|YDR534C|YHR026W|YIL159W|YDL013W|YAR003W|YER145C|YGR188C|YLR369W|YDR518W|YJL187C|YHR064C
23060	0.029308	0.18425	11	278	132	6353	signal transmission	YPL242C|YKR055W|YFR014C|YLR240W|YOR233W|YBL088C|YHR182W|YGR188C|YBL056W|YCR027C|YJL187C
9892	0.029496	0.18425	12	314	132	6353	negative regulation of metabolic process	YNL236W|YMR075W|YDR227W|YDR181C|YAR003W|YOR025W|YBR279W|YNL021W|YAL019W|YJR017C|YPL015C|YDR451C
8104	0.029922	0.18425	20	619	132	6353	protein localization	YGR086C|YGL104C|YCL027W|YGL095C|YGL206C|YIL149C|YNL021W|YDR170C|YDR189W|YOR109W|YLR240W|YBL104C|YGR261C|YER166W|YOR266W|YGR188C|YAL026C|YBL037W|YLR148W|YNR016C
6195	0.03001	0.18425	5	84	132	6353	purine nucleotide catabolic process	YDR135C|YKL188C|YKL209C|YCR027C|YKR054C
9143	0.03001	0.18425	5	84	132	6353	nucleoside triphosphate catabolic process	YDR135C|YKL188C|YKL209C|YCR027C|YKR054C
6348	0.030138	0.18425	4	57	132	6353	chromatin silencing at telomere	YDR181C|YAR003W|YOR025W|YAL019W
51049	0.030138	0.18425	4	57	132	6353	regulation of transport	YBR059C|YGL095C|YLR148W|YDR189W
10639	0.030138	0.18425	4	57	132	6353	negative regulation of organelle organization	YIL159W|YNL271C|YGR188C|YJR017C
43620	0.030385	0.18471	3	33	132	6353	regulation of transcription in response to stress	YBR279W|YOR162C|YNL021W
51174	0.031372	0.18754	5	85	132	6353	regulation of phosphorus metabolic process	YDL179W|YGR086C|YBL056W|YJL187C|YJR017C
19220	0.031372	0.18754	5	85	132	6353	regulation of phosphate metabolic process	YDL179W|YGR086C|YBL056W|YJL187C|YJR017C
30384	0.031866	0.18754	4	58	132	6353	phosphoinositide metabolic process	YOR109W|YKL212W|YLR240W|YHR188C
43549	0.031866	0.18754	4	58	132	6353	regulation of kinase activity	YDL179W|YGR086C|YBL056W|YJL187C
48284	0.031866	0.18754	4	58	132	6353	organelle fusion	YGL173C|YGL095C|YKR054C|YDR189W
23046	0.032799	0.18754	11	283	132	6353	signaling process	YPL242C|YKR055W|YFR014C|YLR240W|YOR233W|YBL088C|YHR182W|YGR188C|YBL056W|YCR027C|YJL187C
147	0.033116	0.18754	2	14	132	6353	actin cortical patch assembly	YBR108W|YIR006C
45910	0.033116	0.18754	2	14	132	6353	negative regulation of DNA recombination	YBR279W|YPL015C
51653	0.033116	0.18754	2	14	132	6353	spindle localization	YNL271C|YKR054C
46834	0.033116	0.18754	2	14	132	6353	lipid phosphorylation	YOR109W|YLR240W
46854	0.033116	0.18754	2	14	132	6353	phosphoinositide phosphorylation	YOR109W|YLR240W
51293	0.033116	0.18754	2	14	132	6353	establishment of spindle localization	YNL271C|YKR054C
31056	0.033116	0.18754	2	14	132	6353	regulation of histone modification	YBR279W|YJR017C
46034	0.033651	0.18957	4	59	132	6353	ATP metabolic process	YDR135C|YKL188C|YKL209C|YKR054C
9166	0.034211	0.19173	5	87	132	6353	nucleotide catabolic process	YDR135C|YKL188C|YKL209C|YCR027C|YKR054C
51338	0.035493	0.19581	4	60	132	6353	regulation of transferase activity	YDL179W|YGR086C|YBL056W|YJL187C
46700	0.0357	0.19581	6	118	132	6353	heterocycle catabolic process	YDR135C|YKL188C|YKL209C|YIR029W|YCR027C|YKR054C
9056	0.036539	0.19581	24	795	132	6353	catabolic process	YBL084C|YBR020W|YDR306C|YGR192C|YGL141W|YLR127C|YCR027C|YAL019W|YIL030C|YDR170C|YOR157C|YLR240W|YGL173C|YDR135C|YDR181C|YKL188C|YFR052W|YKL209C|YIR029W|YDL168W|YKR054C|YJL124C|YPR189W|YFR044C
51129	0.037393	0.19581	4	61	132	6353	negative regulation of cellular component organization	YIL159W|YNL271C|YGR188C|YJR017C
6469	0.0377	0.19581	2	15	132	6353	negative regulation of protein kinase activity	YGR086C|YBL056W
32271	0.0377	0.19581	2	15	132	6353	regulation of protein polymerization	YIL159W|YNL271C
51254	0.038022	0.19581	10	254	132	6353	positive regulation of RNA metabolic process	YIL036W|YNL236W|YLR240W|YBR020W|YDR227W|YBR279W|YOR162C|YNL021W|YJR017C|YPL015C
9086	0.038026	0.19581	3	36	132	6353	methionine biosynthetic process	YER091C|YLR303W|YGL184C
51130	0.039351	0.19581	4	62	132	6353	positive regulation of cellular component organization	YKR055W|YGL095C|YJR017C|YDR189W
44237	0.039601	0.19581	89	3792	132	6353	cellular metabolic process	YBL084C|YER091C|YFL036W|YLR278C|YGL141W|YOR233W|YBR059C|YBL088C|YHR188C|YLR127C|YCR027C|YNL021W|YAL019W|YKL212W|YGR274C|YOR138C|YNL236W|YGL173C|YGR103W|YDR181C|YMR108W|YDL013W|YER081W|YKL209C|YOR025W|YIR029W|YKR054C|YKL216W|YPR144C|YPR093C|YBR061C|YBR020W
226	0.040357	0.19581	5	91	132	6353	microtubule cytoskeleton organization	YNL271C|YBL034C|YIL149C|YGR188C|YKR054C
35304	0.041127	0.19581	1	2	132	6353	regulation of protein amino acid dephosphorylation	YJR017C
33215	0.041127	0.19581	1	2	132	6353	iron assimilation by reduction and transport	YER145C
6266	0.041127	0.19581	1	2	132	6353	DNA ligation	YDL164C
7091	0.041127	0.19581	1	2	132	6353	mitotic metaphase/anaphase transition	YLR127C
51103	0.041127	0.19581	1	2	132	6353	DNA ligation involved in DNA repair	YDL164C
32065	0.041127	0.19581	1	2	132	6353	cortical protein anchoring	YCL027W
6975	0.041127	0.19581	1	2	132	6353	DNA damage induced protein phosphorylation	YBL088C
10697	0.041127	0.19581	1	2	132	6353	negative regulation of spindle pole body separation	YJL187C
35336	0.041127	0.19581	1	2	132	6353	long-chain fatty-acyl-CoA metabolic process	YMR246W
35337	0.041127	0.19581	1	2	132	6353	fatty-acyl-CoA metabolic process	YMR246W
16572	0.041127	0.19581	1	2	132	6353	histone phosphorylation	YBL088C
46835	0.041127	0.19581	1	2	132	6353	carbohydrate phosphorylation	YBR020W
33859	0.041127	0.19581	1	2	132	6353	furaldehyde metabolic process	YDL168W
10037	0.041127	0.19581	1	2	132	6353	response to carbon dioxide	YIL036W
71244	0.041127	0.19581	1	2	132	6353	cellular response to carbon dioxide	YIL036W
15819	0.041127	0.19581	1	2	132	6353	lysine transport	YCR027C
15723	0.041127	0.19581	1	2	132	6353	bilirubin transport	YDR135C
46294	0.041127	0.19581	1	2	132	6353	formaldehyde catabolic process	YDL168W
46292	0.041127	0.19581	1	2	132	6353	formaldehyde metabolic process	YDL168W
46459	0.041127	0.19581	1	2	132	6353	short-chain fatty acid metabolic process	YOR025W
70869	0.041127	0.19581	1	2	132	6353	heterochromatin formation involved in chromatin silencing	YAL019W
70870	0.041127	0.19581	1	2	132	6353	heterochromatin maintenance involved in chromatin silencing	YAL019W
70829	0.041127	0.19581	1	2	132	6353	heterochromatin maintenance	YAL019W
51301	0.041506	0.19631	11	294	132	6353	cell division	YPL242C|YBL084C|YDL179W|YNL271C|YIR006C|YBL034C|YDL164C|YDR364C|YLR127C|YBL085W|YJL187C
32268	0.042001	0.19631	7	155	132	6353	regulation of cellular protein metabolic process	YGL195W|YDR194C|YFL007W|YBR279W|YGR271W|YJR017C|YHR064C
6534	0.04251	0.19631	2	16	132	6353	cysteine metabolic process	YLR303W|YGL184C
51050	0.04251	0.19631	2	16	132	6353	positive regulation of transport	YGL095C|YDR189W
33673	0.04251	0.19631	2	16	132	6353	negative regulation of kinase activity	YGR086C|YBL056W
30866	0.04251	0.19631	2	16	132	6353	cortical actin cytoskeleton organization	YBR108W|YIR006C
30865	0.04251	0.19631	2	16	132	6353	cortical cytoskeleton organization	YBR108W|YIR006C
[truncated: 86 more columns]

## Sheet: PheNetic_allreac_min2and6
File created with BiNGO (c) on Feb 18, 2015 at 3:09:32 PM
ontology: namespace
curator: bingo
Selected ontology file : jar:file:/home/driesdm/.cytoscape/2.8/plugins/BiNGO-2.44/BiNGO.jar!/GO_Biological_Process
Selected annotation file : /home/driesdm/gene_ontologies/gene_association.sgd
Discarded evidence codes :
Overrepresentation
Selected statistical test : Hypergeometric test
Selected correction : Benjamini & Hochberg False Discovery Rate (FDR) correction
Selected significance level : 0.2
Testing option : Use whole annotation as reference set
The selected cluster :
YPL060W	YLR373C	YBR225W	YDR047W	YMR276W	YJR031C	YDR191W	YOL081W	YLR191W	YOL034W	YFR031C	YPL069C	YFL033C	YDR054C	YML075C	YNR043W	YAL026C	YKL189W	YGR052W	YPL215W	YLR131C	YDL132W	YGL197W	YDL155W	YOR272W	YDR325W	YMR065W	YMR246W	YCL061C	YKL104C	YJL070C	YIL152W	YPR052C	YGL087C	YOR278W	YPL116W	YDL102W	YLR293C	YMR125W	YJR042W	YCR030C	YGR109C	YOR057W	YBL105C	YIL026C	YNR016C	YPL153C	YJR126C	YDL205C	YOR051C
No annotations were retrieved for the following entities:
GO-ID	p-value	corr p-value	x	n	X	N	Description	Genes in test set
7049	2.1469e-09	1.5758e-06	23	589	62	6353	cell cycle	YPL153C|YLR131C|YPL116W|YDL102W|YMR276W|YLR079W|YGR109C|YCR030C|YOR057W|YDL132W|YBL105C|YGL238W|YGL197W|YDL155W|YOL034W|YFR031C|YDR325W|YFL033C|YDR054C|YBL023C|YCL061C|YIL026C|YJR068W
22402	1.2785e-07	3.6059e-05	19	499	62	6353	cell cycle process	YLR131C|YPL116W|YDL102W|YMR276W|YLR079W|YGR109C|YDL132W|YGL238W|YGL197W|YDL155W|YOL034W|YFR031C|YDR325W|YFL033C|YDR054C|YBL023C|YCL061C|YIL026C|YJR068W
51329	2.6916e-07	3.6059e-05	9	95	62	6353	interphase of mitotic cell cycle	YLR131C|YPL116W|YDL155W|YDL102W|YDR054C|YBL023C|YLR079W|YGR109C|YDL132W
46501	2.8166e-07	3.6059e-05	4	7	62	6353	protoporphyrinogen IX metabolic process	YOR278W|YDR047W|YDL205C|YDR044W
6782	2.8166e-07	3.6059e-05	4	7	62	6353	protoporphyrinogen IX biosynthetic process	YOR278W|YDR047W|YDL205C|YDR044W
51325	2.9476e-07	3.6059e-05	9	96	62	6353	interphase	YLR131C|YPL116W|YDL155W|YDL102W|YDR054C|YBL023C|YLR079W|YGR109C|YDL132W
278	5.6766e-07	5.9523e-05	14	293	62	6353	mitotic cell cycle	YLR131C|YPL116W|YDL102W|YLR079W|YGR109C|YDL132W|YGL238W|YDL155W|YFR031C|YDR325W|YDR054C|YBL023C|YCL061C|YIL026C
22403	1.0329e-06	9.4767e-05	16	406	62	6353	cell cycle phase	YLR131C|YPL116W|YDL102W|YLR079W|YGR109C|YDL132W|YGL238W|YGL197W|YDL155W|YFR031C|YDR325W|YFL033C|YDR054C|YBL023C|YCL061C|YIL026C
46148	4.2227e-06	0.00034439	5	26	62	6353	pigment biosynthetic process	YOR278W|YDR047W|YPL069C|YDL205C|YDR044W
42440	5.1437e-06	0.00037755	5	27	62	6353	pigment metabolic process	YOR278W|YDR047W|YPL069C|YDL205C|YDR044W
33014	1.036e-05	0.00058492	4	15	62	6353	tetrapyrrole biosynthetic process	YOR278W|YDR047W|YDL205C|YDR044W
6779	1.036e-05	0.00058492	4	15	62	6353	porphyrin biosynthetic process	YOR278W|YDR047W|YDL205C|YDR044W
6783	1.036e-05	0.00058492	4	15	62	6353	heme biosynthetic process	YOR278W|YDR047W|YDL205C|YDR044W
33013	1.3712e-05	0.00062904	4	16	62	6353	tetrapyrrole metabolic process	YOR278W|YDR047W|YDL205C|YDR044W
42168	1.3712e-05	0.00062904	4	16	62	6353	heme metabolic process	YOR278W|YDR047W|YDL205C|YDR044W
6778	1.3712e-05	0.00062904	4	16	62	6353	porphyrin metabolic process	YOR278W|YDR047W|YDL205C|YDR044W
82	2.9451e-05	0.0012716	5	38	62	6353	G1/S transition of mitotic cell cycle	YPL116W|YDR054C|YLR079W|YGR109C|YDL132W
51726	0.00013573	0.0055349	9	203	62	6353	regulation of cell cycle	YPL153C|YDL155W|YDL102W|YFL033C|YCL061C|YLR079W|YGR109C|YJR068W|YOR057W
6996	0.0001621	0.0062621	25	1262	62	6353	organelle organization	YPL116W|YLR293C|YJR031C|YMR276W|YDR191W|YJR042W|YCR030C|YOR057W|YBL105C|YLR191W|YFR031C|YAL026C|YIL026C|YNR016C|YPL215W|YGR239C|YDL155W|YGL238W|YOR272W|YDR325W|YMR065W|YKL021C|YCL061C|YPR052C|YJR068W
84	0.00029847	0.0099579	3	14	62	6353	S phase of mitotic cell cycle	YDL155W|YDL102W|YBL023C
8299	0.00029847	0.0099579	3	14	62	6353	isoprenoid biosynthetic process	YPL069C|YML075C|YNR043W
6720	0.00029847	0.0099579	3	14	62	6353	isoprenoid metabolic process	YPL069C|YML075C|YNR043W
6260	0.00035566	0.011331	7	138	62	6353	DNA replication	YPL153C|YDL102W|YDR054C|YBL023C|YCL061C|YGR109C|YJR068W
51320	0.00037049	0.011331	3	15	62	6353	S phase	YDL155W|YDL102W|YBL023C
9240	0.00055526	0.015095	2	4	62	6353	isopentenyl diphosphate biosynthetic process	YML075C|YNR043W
19287	0.00055526	0.015095	2	4	62	6353	isopentenyl diphosphate biosynthetic process, mevalonate pathway	YML075C|YNR043W
46490	0.00055526	0.015095	2	4	62	6353	isopentenyl diphosphate metabolic process	YML075C|YNR043W
1676	0.00091961	0.024107	2	5	62	6353	long-chain fatty acid metabolic process	YMR246W|YNR016C
6281	0.0011988	0.030342	9	273	62	6353	DNA repair	YGL087C|YPL153C|YDL102W|YFR031C|YOL034W|YBL023C|YCL061C|YPR052C|YJR068W
7062	0.0013539	0.033126	4	50	62	6353	sister chromatid cohesion	YFR031C|YCL061C|YIL026C|YJR068W
50794	0.0015927	0.03771	24	1373	62	6353	regulation of cellular process	YPL215W|YGL087C|YPL153C|YLR131C|YPL116W|YDL102W|YLR293C|YJR031C|YOR051C|YLR079W|YJR042W|YDR191W|YGR109C|YOR057W|YBL105C|YOL081W|YIL130W|YGL197W|YDL155W|YFL033C|YKL189W|YCL061C|YPR052C|YJR068W
70058	0.001907	0.043742	2	7	62	6353	tRNA gene clustering	YDR325W|YFR031C
51301	0.0020083	0.04467	9	294	62	6353	cell division	YGL238W|YDL155W|YDR325W|YFR031C|YDR054C|YKL189W|YIL026C|YGR109C|YDL132W
79	0.0021912	0.047303	3	27	62	6353	regulation of cyclin-dependent protein kinase activity	YDL155W|YLR079W|YGR109C
16043	0.0024031	0.04972	28	1763	62	6353	cellular component organization	YGL087C|YPL116W|YLR293C|YJR031C|YMR276W|YDR191W|YJR042W|YCR030C|YOR057W|YBL105C|YLR191W|YFR031C|YAL026C|YIL026C|YNR016C|YPL215W|YOR051C|YGR239C|YGL238W|YDL155W|YOR272W|YDR325W|YMR065W|YKL021C|YBL023C|YCL061C|YPR052C|YJR068W
23034	0.0024864	0.04972	7	192	62	6353	intracellular signaling pathway	YBL105C|YPL153C|YGL197W|YLR293C|YFL033C|YCL061C|YOR057W
6997	0.0025063	0.04972	4	59	62	6353	nucleus organization	YLR293C|YMR065W|YJR042W|YNR016C
50789	0.0026284	0.050769	24	1422	62	6353	regulation of biological process	YPL215W|YGL087C|YPL153C|YLR131C|YPL116W|YDL102W|YLR293C|YJR031C|YOR051C|YLR079W|YJR042W|YDR191W|YGR109C|YOR057W|YBL105C|YOL081W|YIL130W|YGL197W|YDL155W|YFL033C|YKL189W|YCL061C|YPR052C|YJR068W
86	0.0032752	0.060002	3	31	62	6353	G2/M transition of mitotic cell cycle	YDL155W|YDR054C|YDL132W
6974	0.0032776	0.060002	9	316	62	6353	response to DNA damage stimulus	YGL087C|YPL153C|YDL102W|YFR031C|YOL034W|YBL023C|YCL061C|YPR052C|YJR068W
7059	0.0033516	0.060002	6	151	62	6353	chromosome segregation	YDR325W|YFR031C|YOL034W|YCL061C|YIL026C|YJR068W
6261	0.0034364	0.060055	5	105	62	6353	DNA-dependent DNA replication	YPL153C|YDL102W|YBL023C|YCL061C|YJR068W
6271	0.0042706	0.072898	3	34	62	6353	DNA strand elongation involved in DNA replication	YDL102W|YBL023C|YJR068W
51186	0.0046641	0.077806	7	215	62	6353	cofactor metabolic process	YOR278W|YDR047W|YDL205C|YML075C|YMR246W|YNR043W|YDR044W
22616	0.0050256	0.080833	3	36	62	6353	DNA strand elongation	YDL102W|YBL023C|YJR068W
7165	0.0051506	0.080833	8	277	62	6353	signal transduction	YBL105C|YOL081W|YPL153C|YGL197W|YLR293C|YFL033C|YCL061C|YOR057W
23060	0.0052628	0.080833	8	278	62	6353	signal transmission	YBL105C|YOL081W|YPL153C|YGL197W|YLR293C|YFL033C|YCL061C|YOR057W
23033	0.0052861	0.080833	7	220	62	6353	signaling pathway	YBL105C|YPL153C|YGL197W|YLR293C|YFL033C|YCL061C|YOR057W
6259	0.0056299	0.083438	11	475	62	6353	DNA metabolic process	YGL087C|YPL153C|YDL102W|YFR031C|YOL034W|YDR054C|YBL023C|YCL061C|YGR109C|YPR052C|YJR068W
70	0.0056838	0.083438	4	74	62	6353	mitotic sister chromatid segregation	YDR325W|YFR031C|YCL061C|YIL026C
23046	0.0058527	0.084233	8	283	62	6353	signaling process	YBL105C|YOL081W|YPL153C|YGL197W|YLR293C|YFL033C|YCL061C|YOR057W
43687	0.0059935	0.084601	11	479	62	6353	post-translational protein modification	YBL105C|YGL087C|YPL153C|YPL116W|YDL205C|YFL033C|YDR054C|YGR052W|YDR191W|YOR057W|YDL132W
819	0.0071585	0.098126	4	79	62	6353	sister chromatid segregation	YDR325W|YFR031C|YCL061C|YIL026C
45005	0.0079081	0.098126	2	14	62	6353	maintenance of fidelity involved in DNA-dependent DNA replication	YDL102W|YCL061C
7067	0.0080655	0.098126	6	181	62	6353	mitosis	YGL238W|YDL155W|YDR325W|YFR031C|YCL061C|YIL026C
51276	0.0081211	0.098126	10	430	62	6353	chromosome organization	YPL116W|YOR272W|YDR325W|YFR031C|YCL061C|YIL026C|YDR191W|YPR052C|YJR068W|YOR057W
280	0.0084944	0.098126	6	183	62	6353	nuclear division	YGL238W|YDL155W|YDR325W|YFR031C|YCL061C|YIL026C
6950	0.0085408	0.098126	14	723	62	6353	response to stress	YGL087C|YOL081W|YIL130W|YPL153C|YDL102W|YFR031C|YOL034W|YFL033C|YJR031C|YMR125W|YBL023C|YCL061C|YPR052C|YJR068W
65007	0.0089815	0.098126	25	1647	62	6353	biological regulation	YPL215W|YGL087C|YPL153C|YLR131C|YPL116W|YDL102W|YLR293C|YJR031C|YOR051C|YLR079W|YJR042W|YDR191W|YGR109C|YGR239C|YOR057W|YBL105C|YOL081W|YIL130W|YGL197W|YDL155W|YFL033C|YKL189W|YCL061C|YPR052C|YJR068W
7076	0.0090677	0.098126	2	15	62	6353	mitotic chromosome condensation	YDR325W|YFR031C
23052	0.0090709	0.098126	8	305	62	6353	signaling	YBL105C|YOL081W|YPL153C|YGL197W|YLR293C|YFL033C|YCL061C|YOR057W
87	0.0094013	0.098126	6	187	62	6353	M phase of mitotic cell cycle	YGL238W|YDL155W|YDR325W|YFR031C|YCL061C|YIL026C
42759	0.0097592	0.098126	1	1	62	6353	long-chain fatty acid biosynthetic process	YNR016C
6287	0.0097592	0.098126	1	1	62	6353	base-excision repair, gap-filling	YDL102W
16117	0.0097592	0.098126	1	1	62	6353	carotenoid biosynthetic process	YPL069C
16116	0.0097592	0.098126	1	1	62	6353	carotenoid metabolic process	YPL069C
16108	0.0097592	0.098126	1	1	62	6353	tetraterpenoid metabolic process	YPL069C
16109	0.0097592	0.098126	1	1	62	6353	tetraterpenoid biosynthetic process	YPL069C
18160	0.0097592	0.098126	1	1	62	6353	peptidyl-pyrromethane cofactor linkage	YDL205C
32092	0.0097592	0.098126	1	1	62	6353	positive regulation of protein binding	YGR239C
33386	0.0097592	0.098126	1	1	62	6353	geranylgeranyl diphosphate biosynthetic process	YPL069C
33385	0.0097592	0.098126	1	1	62	6353	geranylgeranyl diphosphate metabolic process	YPL069C
18198	0.0097592	0.098126	1	1	62	6353	peptidyl-cysteine modification	YDL205C
18130	0.01001	0.099288	4	87	62	6353	heterocycle biosynthetic process	YOR278W|YDR047W|YDL205C|YDR044W
48285	0.010889	0.10657	6	193	62	6353	organelle fission	YGL238W|YDL155W|YDR325W|YFR031C|YCL061C|YIL026C
34622	0.011857	0.11452	9	386	62	6353	cellular macromolecular complex assembly	YBL105C|YGL087C|YPL215W|YLR191W|YKL021C|YBL023C|YAL026C|YPR052C|YOR057W
30261	0.012967	0.12202	2	18	62	6353	chromosome condensation	YDR325W|YFR031C
31146	0.012967	0.12202	2	18	62	6353	SCF-dependent proteasomal ubiquitin-dependent protein catabolic process	YDR054C|YDL132W
9987	0.013837	0.12617	57	5142	62	6353	cellular process	YPL060W|YLR373C|YDR047W|YMR276W|YJR031C|YDR191W|YLR191W|YOL034W|YFR031C|YPL069C|YFL033C|YML075C|YDR054C|YAL026C|YNR043W|YKL189W|YGR052W|YPL215W|YLR131C|YDL132W|YDL155W|YGL197W|YOR272W|YDR325W|YMR065W|YMR246W|YCL061C|YKL104C|YPR052C|YGL087C|YOR278W|YPL116W
279	0.014417	0.12617	8	331	62	6353	M phase	YGL238W|YDL155W|YGL197W|YDR325W|YFR031C|YFL033C|YCL061C|YIL026C
16567	0.015007	0.12617	4	98	62	6353	protein ubiquitination	YGL087C|YDR054C|YOR057W|YDL132W
6631	0.015423	0.12617	3	54	62	6353	fatty acid metabolic process	YMR246W|YDR191W|YNR016C
6725	0.015527	0.12617	4	99	62	6353	cellular aromatic compound metabolic process	YOR278W|YDR047W|YDL205C|YDR044W
31323	0.015768	0.12617	17	1021	62	6353	regulation of cellular metabolic process	YPL215W|YLR131C|YPL116W|YLR293C|YOR051C|YLR079W|YDR191W|YJR042W|YGR109C|YBL105C|YOL081W|YIL130W|YDL155W|YFL033C|YKL189W|YCL061C|YPR052C
35556	0.015895	0.12617	5	152	62	6353	intracellular signal transduction	YBL105C|YGL197W|YLR293C|YFL033C|YOR057W
45859	0.016201	0.12617	3	55	62	6353	regulation of protein kinase activity	YDL155W|YLR079W|YGR109C
16575	0.017468	0.12617	2	21	62	6353	histone deacetylation	YPL116W|YDR191W
43549	0.018667	0.12617	3	58	62	6353	regulation of kinase activity	YDL155W|YLR079W|YGR109C
6886	0.018689	0.12617	8	347	62	6353	intracellular protein transport	YGL238W|YLR191W|YJR126C|YLR293C|YAL026C|YJR042W|YGR239C|YNR016C
19222	0.018888	0.12617	17	1041	62	6353	regulation of metabolic process	YPL215W|YLR131C|YPL116W|YLR293C|YOR051C|YLR079W|YDR191W|YJR042W|YGR109C|YBL105C|YOL081W|YIL130W|YDL155W|YFL033C|YKL189W|YCL061C|YPR052C
16558	0.019095	0.12617	2	22	62	6353	protein import into peroxisome matrix	YLR191W|YGR239C
209	0.019095	0.12617	2	22	62	6353	protein polyubiquitination	YGL087C|YDR054C
22603	0.019095	0.12617	2	22	62	6353	regulation of anatomical structure morphogenesis	YGL197W|YKL189W
43939	0.019425	0.12617	1	2	62	6353	negative regulation of sporulation	YGL197W
45596	0.019425	0.12617	1	2	62	6353	negative regulation of cell differentiation	YGL197W
45004	0.019425	0.12617	1	2	62	6353	DNA replication proofreading	YDL102W
45016	0.019425	0.12617	1	2	62	6353	mitochondrial magnesium ion transport	YPL060W
10032	0.019425	0.12617	1	2	62	6353	meiotic chromosome condensation	YDR325W
6297	0.019425	0.12617	1	2	62	6353	nucleotide-excision repair, DNA gap filling	YDL102W
43393	0.019425	0.12617	1	2	62	6353	regulation of protein binding	YGR239C
51093	0.019425	0.12617	1	2	62	6353	negative regulation of developmental process	YGL197W
71139	0.019425	0.12617	1	2	62	6353	resolution of recombination intermediates	YOL034W
30818	0.019425	0.12617	1	2	62	6353	negative regulation of cAMP biosynthetic process	YOL081W
30803	0.019425	0.12617	1	2	62	6353	negative regulation of cyclic nucleotide biosynthetic process	YOL081W
30800	0.019425	0.12617	1	2	62	6353	negative regulation of cyclic nucleotide metabolic process	YOL081W
30809	0.019425	0.12617	1	2	62	6353	negative regulation of nucleotide biosynthetic process	YOL081W
30815	0.019425	0.12617	1	2	62	6353	negative regulation of cAMP metabolic process	YOL081W
33384	0.019425	0.12617	1	2	62	6353	geranyl diphosphate biosynthetic process	YPL069C
33383	0.019425	0.12617	1	2	62	6353	geranyl diphosphate metabolic process	YPL069C
46459	0.019425	0.12617	1	2	62	6353	short-chain fatty acid metabolic process	YDR191W
35336	0.019425	0.12617	1	2	62	6353	long-chain fatty-acyl-CoA metabolic process	YMR246W
35337	0.019425	0.12617	1	2	62	6353	fatty-acyl-CoA metabolic process	YMR246W
42174	0.019425	0.12617	1	2	62	6353	negative regulation of sporulation resulting in formation of a cellular spore	YGL197W
34621	0.019923	0.12828	10	493	62	6353	cellular macromolecular complex subunit organization	YBL105C|YGL087C|YPL215W|YLR191W|YKL021C|YBL023C|YAL026C|YOR051C|YPR052C|YOR057W
51338	0.020421	0.13034	3	60	62	6353	regulation of transferase activity	YDL155W|YLR079W|YGR109C
6476	0.020784	0.13039	2	23	62	6353	protein amino acid deacetylation	YPL116W|YDR191W
6298	0.020784	0.13039	2	23	62	6353	mismatch repair	YPR052C|YJR068W
6625	0.022533	0.13813	2	24	62	6353	protein targeting to peroxisome	YLR191W|YGR239C
43574	0.022533	0.13813	2	24	62	6353	peroxisomal transport	YLR191W|YGR239C
65003	0.022582	0.13813	9	430	62	6353	macromolecular complex assembly	YBL105C|YGL087C|YPL215W|YLR191W|YKL021C|YBL023C|YAL026C|YPR052C|YOR057W
33036	0.023671	0.14359	13	738	62	6353	macromolecule localization	YPL153C|YLR373C|YGL238W|YLR191W|YJR126C|YLR293C|YPL069C|YMR125W|YMR246W|YAL026C|YJR042W|YGR239C|YNR016C
44255	0.025315	0.15029	6	233	62	6353	cellular lipid metabolic process	YPL069C|YML075C|YMR246W|YNR043W|YDR191W|YNR016C
65009	0.025647	0.15029	5	172	62	6353	regulation of molecular function	YOL081W|YDL155W|YLR079W|YGR109C|YGR239C
42787	0.026205	0.15029	2	26	62	6353	protein ubiquitination involved in ubiquitin-dependent protein catabolic process	YDR054C|YDL132W
42770	0.026205	0.15029	2	26	62	6353	DNA damage response, signal transduction	YPL153C|YCL061C
77	0.026205	0.15029	2	26	62	6353	DNA damage checkpoint	YPL153C|YCL061C
10648	0.026205	0.15029	2	26	62	6353	negative regulation of cell communication	YOL081W|YLR079W
42325	0.026209	0.15029	3	66	62	6353	regulation of phosphorylation	YDL155W|YLR079W|YGR109C
10994	0.028997	0.15965	1	3	62	6353	free ubiquitin chain polymerization	YGL087C
6637	0.028997	0.15965	1	3	62	6353	acyl-CoA metabolic process	YMR246W
9847	0.028997	0.15965	1	3	62	6353	spore germination	YIL026C
9202	0.028997	0.15965	1	3	62	6353	deoxyribonucleoside triphosphate biosynthetic process	YPL153C
35383	0.028997	0.15965	1	3	62	6353	thioester metabolic process	YMR246W
51188	0.029146	0.15965	4	120	62	6353	cofactor biosynthetic process	YOR278W|YDR047W|YDL205C|YDR044W
32446	0.029928	0.16272	4	121	62	6353	protein modification by small protein conjugation	YGL087C|YDR054C|YOR057W|YDL132W
7031	0.030508	0.16466	3	70	62	6353	peroxisome organization	YBL105C|YLR191W|YGR239C
50793	0.032132	0.17215	2	29	62	6353	regulation of developmental process	YGL197W|YKL189W
43933	0.032925	0.17512	10	535	62	6353	macromolecular complex subunit organization	YBL105C|YGL087C|YPL215W|YLR191W|YKL021C|YBL023C|YAL026C|YOR051C|YPR052C|YOR057W
15031	0.033294	0.17581	10	536	62	6353	protein transport	YLR373C|YGL238W|YLR191W|YJR126C|YLR293C|YPL069C|YAL026C|YJR042W|YGR239C|YNR016C
33554	0.034801	0.18157	10	540	62	6353	cellular response to stress	YGL087C|YPL153C|YDL102W|YFR031C|YOL034W|YJR031C|YBL023C|YCL061C|YPR052C|YJR068W
17038	0.034879	0.18157	4	127	62	6353	protein import	YLR191W|YJR042W|YGR239C|YNR016C
8104	0.035249	0.1822	11	619	62	6353	protein localization	YPL153C|YLR373C|YGL238W|YLR191W|YJR126C|YLR293C|YPL069C|YAL026C|YJR042W|YGR239C|YNR016C
6464	0.036342	0.18459	11	622	62	6353	protein modification process	YBL105C|YGL087C|YPL153C|YPL116W|YDL205C|YFL033C|YDR054C|YGR052W|YDR191W|YOR057W|YDL132W
31570	0.036348	0.18459	2	31	62	6353	DNA integrity checkpoint	YPL153C|YCL061C
22607	0.036711	0.18459	11	623	62	6353	cellular component assembly	YBL105C|YGL087C|YPL215W|YLR191W|YMR276W|YKL021C|YBL023C|YAL026C|YCR030C|YPR052C|YOR057W
34641	0.036747	0.18459	27	2034	62	6353	cellular nitrogen compound metabolic process	YGL087C|YPL153C|YOR278W|YLR131C|YPL116W|YDL102W|YDR047W|YLR293C|YDL205C|YMR125W|YOR051C|YDR191W|YGR109C|YOR341W|YIL130W|YOR272W|YOL034W|YFR031C|YKL021C|YDR054C|YML075C|YBL023C|YCL061C|YKL104C|YDR044W|YPR052C|YJR068W
45184	0.037553	0.18459	10	547	62	6353	establishment of protein localization	YLR373C|YGL238W|YLR191W|YJR126C|YLR293C|YPL069C|YAL026C|YJR042W|YGR239C|YNR016C
16114	0.038478	0.18459	1	4	62	6353	terpenoid biosynthetic process	YPL069C
45980	0.038478	0.18459	1	4	62	6353	negative regulation of nucleotide metabolic process	YOL081W
15693	0.038478	0.18459	1	4	62	6353	magnesium ion transport	YPL060W
51865	0.038478	0.18459	1	4	62	6353	protein autoubiquitination	YDR054C
42173	0.038478	0.18459	1	4	62	6353	regulation of sporulation resulting in formation of a cellular spore	YGL197W
6721	0.038478	0.18459	1	4	62	6353	terpenoid metabolic process	YPL069C
16126	0.040765	0.1918	2	33	62	6353	sterol biosynthetic process	YML075C|YNR043W
6270	0.040765	0.1918	2	33	62	6353	DNA-dependent DNA replication initiation	YPL153C|YBL023C
6694	0.040765	0.1918	2	33	62	6353	steroid biosynthetic process	YML075C|YNR043W
34613	0.041853	0.19261	8	405	62	6353	cellular protein localization	YGL238W|YLR191W|YJR126C|YLR293C|YAL026C|YJR042W|YGR239C|YNR016C
70925	0.044124	0.19261	3	81	62	6353	organelle assembly	YKL021C|YAL026C|YOR057W
19219	0.044512	0.19261	13	806	62	6353	regulation of nucleobase, nucleoside, nucleotide and nucleic acid metabolic process	YLR131C|YPL116W|YLR293C|YOR051C|YDR191W|YJR042W|YOL081W|YBL105C|YIL130W|YFL033C|YKL189W|YCL061C|YPR052C
6807	0.044884	0.19261	27	2068	62	6353	nitrogen compound metabolic process	YGL087C|YPL153C|YOR278W|YLR131C|YPL116W|YDL102W|YDR047W|YLR293C|YDL205C|YMR125W|YOR051C|YDR191W|YGR109C|YOR341W|YIL130W|YOR272W|YOL034W|YFR031C|YKL021C|YDR054C|YML075C|YBL023C|YCL061C|YKL104C|YDR044W|YPR052C|YJR068W
51171	0.045663	0.19261	13	809	62	6353	regulation of nitrogen compound metabolic process	YLR131C|YPL116W|YLR293C|YOR051C|YDR191W|YJR042W|YOL081W|YBL105C|YIL130W|YFL033C|YKL189W|YCL061C|YPR052C
10993	0.047867	0.19261	1	5	62	6353	regulation of ubiquitin homeostasis	YGL087C
16560	0.047867	0.19261	1	5	62	6353	protein import into peroxisome matrix, docking	YLR191W
60211	0.047867	0.19261	1	5	62	6353	regulation of nuclear-transcribed mRNA poly(A) tail shortening	YBL105C
16242	0.047867	0.19261	1	5	62	6353	negative regulation of macroautophagy	YLR079W
15909	0.047867	0.19261	1	5	62	6353	long-chain fatty acid transport	YMR246W
32105	0.047867	0.19261	1	5	62	6353	negative regulation of response to extracellular stimulus	YLR079W
32108	0.047867	0.19261	1	5	62	6353	negative regulation of response to nutrient levels	YLR079W
32102	0.047867	0.19261	1	5	62	6353	negative regulation of response to external stimulus	YLR079W
51099	0.047867	0.19261	1	5	62	6353	positive regulation of binding	YGR239C
70933	0.047867	0.19261	1	5	62	6353	histone H4 deacetylation	YPL116W
70932	0.047867	0.19261	1	5	62	6353	histone H3 deacetylation	YPL116W
6047	0.047867	0.19261	1	5	62	6353	UDP-N-acetylglucosamine metabolic process	YKL104C
6045	0.047867	0.19261	1	5	62	6353	N-acetylglucosamine biosynthetic process	YKL104C
6044	0.047867	0.19261	1	5	62	6353	N-acetylglucosamine metabolic process	YKL104C
6042	0.047867	0.19261	1	5	62	6353	glucosamine biosynthetic process	YKL104C
6041	0.047867	0.19261	1	5	62	6353	glucosamine metabolic process	YKL104C
6040	0.047867	0.19261	1	5	62	6353	amino sugar metabolic process	YKL104C
6048	0.047867	0.19261	1	5	62	6353	UDP-N-acetylglucosamine biosynthetic process	YKL104C
46349	0.047867	0.19261	1	5	62	6353	amino sugar biosynthetic process	YKL104C
45337	0.047867	0.19261	1	5	62	6353	farnesyl diphosphate biosynthetic process	YPL069C
45338	0.047867	0.19261	1	5	62	6353	farnesyl diphosphate metabolic process	YPL069C
75	0.048284	0.19261	3	84	62	6353	cell cycle checkpoint	YPL153C|YCL061C|YJR068W
8654	0.048284	0.19261	3	84	62	6353	phospholipid biosynthetic process	YPL069C|YML075C|YNR043W
51174	0.049713	0.19513	3	85	62	6353	regulation of phosphorus metabolic process	YDL155W|YLR079W|YGR109C
71103	0.049713	0.19513	3	85	62	6353	DNA conformation change	YDR325W|YFR031C|YBL023C
19220	0.049713	0.19513	3	85	62	6353	regulation of phosphate metabolic process	YDL155W|YLR079W|YGR109C
6605	0.050508	0.1972	6	275	62	6353	protein targeting	YGL238W|YLR191W|YJR126C|YJR042W|YGR239C|YNR016C
6629	0.051248	0.19825	6	276	62	6353	lipid metabolic process	YPL069C|YML075C|YMR246W|YNR043W|YDR191W|YNR016C
10468	0.051318	0.19825	13	823	62	6353	regulation of gene expression	YPL215W|YLR131C|YPL116W|YLR293C|YOR051C|YDR191W|YJR042W|YBL105C|YIL130W|YFL033C|YKL189W|YCL061C|YPR052C
7064	0.052626	0.19981	2	38	62	6353	mitotic sister chromatid cohesion	YCL061C|YIL026C
6468	0.053547	0.19981	4	146	62	6353	protein amino acid phosphorylation	YBL105C|YPL153C|YFL033C|YGR052W
70727	0.053639	0.19981	8	426	62	6353	cellular macromolecule localization	YGL238W|YLR191W|YJR126C|YLR293C|YAL026C|YJR042W|YGR239C|YNR016C
70647	0.05691	0.19981	4	149	62	6353	protein modification by small protein conjugation or removal	YGL087C|YDR054C|YOR057W|YDL132W
43937	0.057167	0.19981	1	6	62	6353	regulation of sporulation	YGL197W
160	0.057167	0.19981	1	6	62	6353	two-component signal transduction system (phosphorelay)	YFL033C
6279	0.057167	0.19981	1	6	62	6353	premeiotic DNA synthesis	YGR109C
61013	0.057167	0.19981	1	6	62	6353	regulation of mRNA catabolic process	YBL105C
1323	0.057167	0.19981	1	6	62	6353	age-dependent general metabolic decline involved in chronological cell aging	YFL033C
1324	0.057167	0.19981	1	6	62	6353	age-dependent response to oxidative stress involved in chronological cell aging	YFL033C
9200	0.057167	0.19981	1	6	62	6353	deoxyribonucleoside triphosphate metabolic process	YPL153C
51382	0.057167	0.19981	1	6	62	6353	kinetochore assembly	YOR057W
6998	0.057167	0.19981	1	6	62	6353	nuclear envelope organization	YNR016C
30817	0.057167	0.19981	1	6	62	6353	regulation of cAMP biosynthetic process	YOL081W
30802	0.057167	0.19981	1	6	62	6353	regulation of cyclic nucleotide biosynthetic process	YOL081W
30808	0.057167	0.19981	1	6	62	6353	regulation of nucleotide biosynthetic process	YOL081W
30814	0.057167	0.19981	1	6	62	6353	regulation of cAMP metabolic process	YOL081W
30799	0.057167	0.19981	1	6	62	6353	regulation of cyclic nucleotide metabolic process	YOL081W
70898	0.057167	0.19981	1	6	62	6353	RNA polymerase III transcriptional preinitiation complex assembly	YPR052C
48478	0.057167	0.19981	1	6	62	6353	replication fork protection	YCL061C
[truncated: 12 more columns]
